# Supplementary material for: Pd(ii)-catalyzed hydroarylations/hydroalkenylations of terminal alkynes: regioselective synthesis of allylic, homoallylic, and 1,3-diene systems
Source: Royal Society of Chemistry journal article supplement (doi:10.1039/d4cc00049h), 2024-01-01

# Supporting Information

## **Pd(II)-Catalyzed hydroarylations/hydroalkenylations of terminal alkynes: regioselective synthesis of allylic, homoallylic and 1,3-diene systems**

Jivan Shinde, Sundaram Suresh, Veerababurao Kavala, and Ching-Fa Yao\*

Department of Chemistry, National Taiwan Normal University, 88, Sec. 4, Ting-Zhou Road, Taipei-11677,

Taiwan R.O.C.

\* E-mail: cheyaocf@ntnu.edu.tw

### Table of Contents

|             |                                         |     |
|-------------|-----------------------------------------|-----|
| <b>I</b>    | General Remarks                         | S2  |
| <b>II</b>   | Optimization of the Reaction Conditions | S3  |
| <b>III</b>  | Experimental procedures                 | S3  |
| <b>IV</b>   | Control Experiments                     | S10 |
| <b>V</b>    | Single Crystal X-ray Analytical Data    | S15 |
| <b>VI</b>   | Spectral Data                           | S18 |
| <b>VII</b>  | References                              | S32 |
| <b>VIII</b> | Spectra Copies                          | S34 |

## I. General Remarks:

Unless otherwise stated, all reagents were purchased from commercial suppliers and were used directly without any further purification. All solvents were dried according to known methods and distilled prior to use. All reactions were conducted under a nitrogen atmosphere on a dual-manifold Schlenk line unless otherwise mentioned and in oven-dried glassware. All reactions that require anhydrous conditions were conducted under an argon atmosphere. For reactions that required heating, an oil bath was used as the heat source. (Flash column chromatography was performed on 63-200 mesh silica gel using n-hexane (distilled) and ethyl acetate as eluents.  $^1\text{H}$  and  $^{13}\text{C}$  NMR spectra were recorded on a Bruker Ascend spectrometer at 400 and 100 MHz, respectively. Chemical shifts are reported in parts per million (ppm) on the  $\delta$  scale by using  $\text{CDCl}_3$ , as an internal standard. Multiplicities were indicated by using abbreviations s=singlet; d=doublet; t=triplet; q=quartet; and m=multiplet. Coupling constants are expressed in Hertz (Hz). High-Resolution Mass Spectra (HRMS) were recorded in JEOL JMS-700 M Station and ESI-TOF mode. The melting points (mp) were obtained on an Electro-Thermal FARGO MP-2D capillary melting point apparatus. The X-ray diffraction measurements were carried out at 200 K on either a Bruker D8 Venture or a Bruker KAPPA APEX II CCD area detector system equipped with a graphite monochromator and a Mo- $K\alpha$  fine-focus sealed tube ( $k = 0.71073 \text{ \AA}$ ).

## II. Table 1. Optimization of the Reaction Conditions.

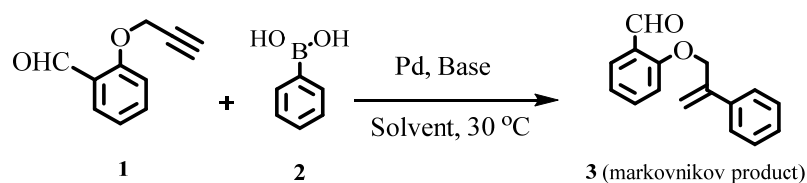

| Entry <sup>a</sup> | Cat.<br>(3 mol%)                                     | Base<br>(equiv.)               | Solvent<br>2 mL   | T(°C)<br>/t (h) | Yield (%) <sup>b</sup> |
|--------------------|------------------------------------------------------|--------------------------------|-------------------|-----------------|------------------------|
| 01                 | -                                                    | KOAc                           | DCM               | 30/2.5          | ND                     |
| 02                 | PdCl <sub>2</sub> (PPh <sub>3</sub> ) <sub>2</sub>   | KOAc                           | DCM               | 30/2.5          | 66                     |
| 03                 | PdCl <sub>2</sub> (PPh <sub>3</sub> ) <sub>2</sub>   | KOAc                           | DMSO              | 30/2.5          | ND                     |
| 04                 | PdCl <sub>2</sub> (PPh <sub>3</sub> ) <sub>2</sub>   | KOAc                           | DMF               | 30/2.5          | ND                     |
| 05                 | PdCl <sub>2</sub> (PPh <sub>3</sub> ) <sub>2</sub>   | KOAc                           | THF               | 30/2.5          | 14                     |
| 06                 | PdCl <sub>2</sub> (PPh <sub>3</sub> ) <sub>2</sub>   | KOAc                           | ACN               | 30/2.5          | ND                     |
| 07                 | PdCl <sub>2</sub> (PPh <sub>3</sub> ) <sub>2</sub>   | KOAc                           | CHCl <sub>3</sub> | 30/2.5          | 58                     |
| <b>08</b>          | <b>PdCl<sub>2</sub>(PPh<sub>3</sub>)<sub>2</sub></b> | <b>KOAc</b>                    | <b>DCE</b>        | <b>30/2.5</b>   | <b>98</b>              |
| 09 <sup>c</sup>    | PdCl <sub>2</sub> (PPh <sub>3</sub> ) <sub>2</sub>   | KOAc                           | DCE               | 30/2.5          | 54                     |
| 10                 | PdCl <sub>2</sub> (PPh <sub>3</sub> ) <sub>2</sub>   | NaOAc                          | DCE               | 30/4.5          | 65                     |
| 11                 | PdCl <sub>2</sub> (PPh <sub>3</sub> ) <sub>2</sub>   | K <sub>2</sub> CO <sub>3</sub> | DCE               | 30/2.5          | ND                     |
| 12                 | PdCl <sub>2</sub> (PPh <sub>3</sub> ) <sub>2</sub>   | K <sub>3</sub> PO <sub>4</sub> | DCE               | 30/2.5          | ND                     |
| 13                 | PdCl <sub>2</sub>                                    | KOAc                           | DCE               | 30/2.5          | 06                     |
| 14                 | Pd(OAc) <sub>2</sub>                                 | KOAc                           | DCE               | 30/2.5          | ND                     |

<sup>[a]</sup> **1** (0.4 mmol), **2** (0.6 mmol), catalyst (3 mol%), KOAc (0.8 mmol), solvent (2 mL) at 30 °C for 2.5 h. <sup>[b]</sup> Yields were calculated from the crude reaction mixtures by <sup>1</sup>H NMR using CH<sub>2</sub>Br<sub>2</sub> as the internal standard. <sup>[c]</sup> 1 mol% of catalyst was used. The biphenyl compound was formed only in traces. ND-not detected.

## III. Experimental Procedures

Synthesis of starting materials: -

a) General procedure for the synthesis of propargyl aryl ethers <sup>1</sup>

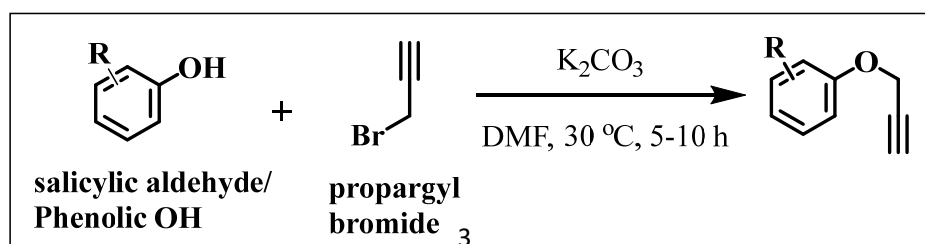

A 50 mL round bottom flask was charged with salicylic aldehyde (1220 mg, 10 mmol) in DMF (25 mL) then  $K_2CO_3$  (2760 mg, 20 mmol) was added. Then, a propargyl bromide (1309 mg, 11 mmol) was added dropwise at 0 °C over 5 min. After completion of the addition, the reaction mixture was stirred at 30 °C for 5 h and quenched with crushed ice. The reaction mixture was extracted with EtOAc (30 mL  $\times$  3) and the organic phase was dried over anhydrous  $MgSO_4$ . The solvent was then removed under reduced pressure and the crude product was purified by flash chromatography with the eluent hexane-ethyl acetate.

**List of Isolated molecules-**

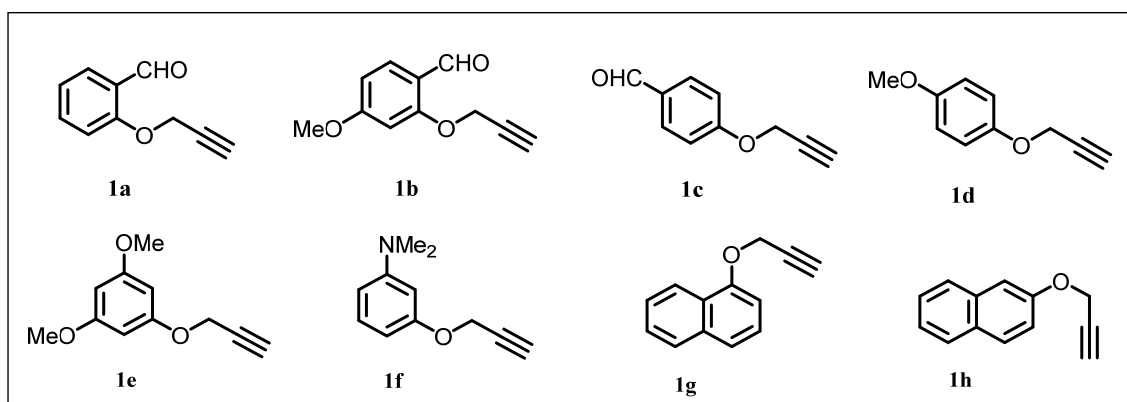

**b) General procedure for propargyl aryl ethers/amine synthesis<sup>2</sup>**

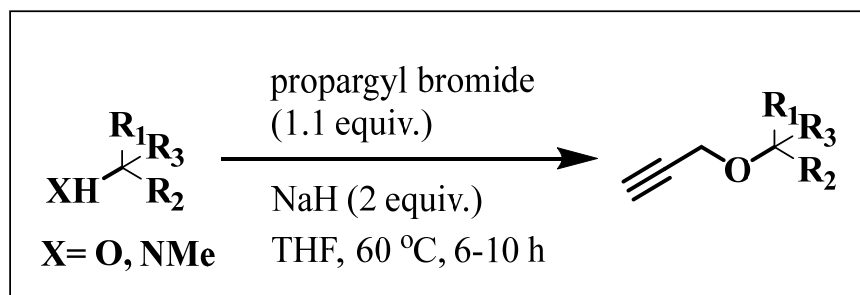

In a dried 50 mL flask containing alcohol/amine (3 mmol) in THF (25 mL), NaH (0.144 g, 6 mmol) was added. Then a solution of propargyl bromide (0.392 g, 3.3 mmol) in THF (5 mL) was added dropwise over 10 minutes. The reaction mixture was stirred at 60 °C for 6-10h, after completion of the reaction,  $NH_4Cl$  solution was added and the reaction mixture was dissolved

in ethyl acetate further organic layer was separated and dried over anhydrous  $\text{MgSO}_4$ . The solvent was removed under reduced pressure, and the crude residue was subjected to flash column chromatography on silica gel (eluent hexane-ethyl acetate) to obtain the pure terminal alkynes.

**List of Isolated molecules-**

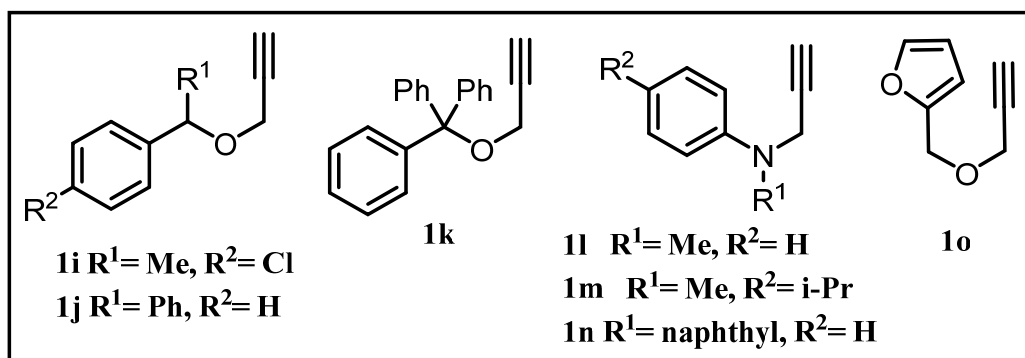

**c) General procedure for But-3-yn-1-yl benzoate synthesis<sup>3</sup>**

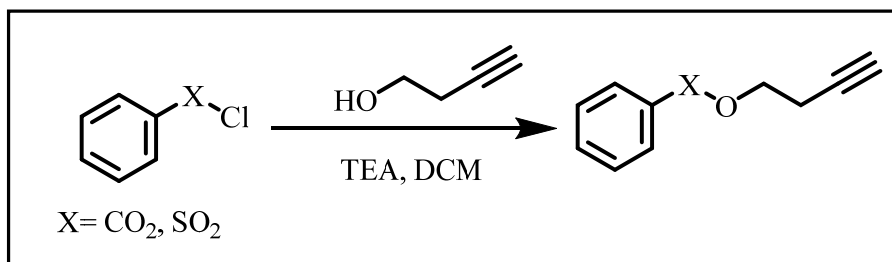

In a dried 50 mL flask containing but-3-yn-1-ol (0.77 g, 5.5 mmol) in DCM (25 mL) at 0 °C, TEA (2 mL, 15 mmol) was added. Then a solution of benzoyl chloride/sulfonyl chloride (5 mmol) was added. The reaction mixture was stirred at room temperature for 6 hours, after completion of the reaction crushed ice was added and the reaction mixture was washed by DCM. The organic layer was separated by a separatory funnel and further dried over anhydrous  $\text{MgSO}_4$ . The solvent was removed under reduced pressure, and the crude residue was subjected to flash column chromatography on silica gel (eluent hexane-ethyl acetate) to obtain the pure but-3-yn-1-yl benzoate.

List of Isolated molecules-

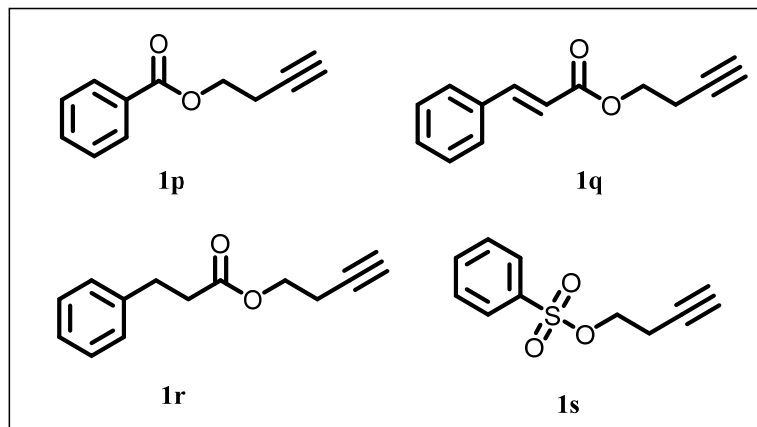

d) Synthesis of 1-methoxy-4-(3-(4-methoxyphenoxy)prop-1-yn-1-yl)benzene<sup>4</sup>

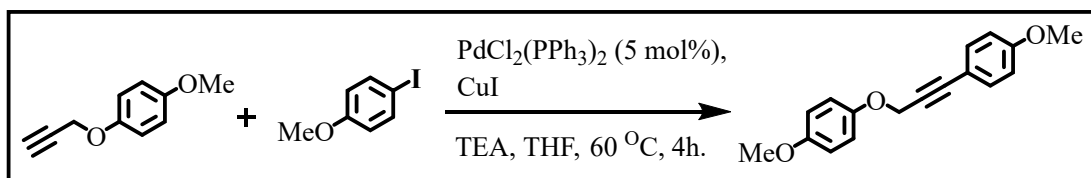

To a 50 mL round bottom flask was added 1-methoxy-4-(prop-2-yn-1-yloxy)benzene (0.648 g, 4 mmol,) and 1-iodo-4-methoxybenzene (1.1 g, 4.8 mmol). Later Triethyl amine (0.808 g, 8 mmol) and THF solvent (30 mL) were added to system then reaction mixture degassed by using nitrogen gas. Then CuI (0.038 g, 0.2 mmol). and PdCl<sub>2</sub>(PPh<sub>3</sub>)<sub>2</sub> (0.140 g 5 mol%) were added. The resulting mixture was heated for 4 h at 60 °C. After completion of the reaction, the reaction mixture extracted with ethyl acetate-water system, and the organic layer was separated and evaporated under reduced pressure. The crude residue was then subjected to flash column chromatography on silica gel (eluent hexane-ethyl acetate) to obtain the pure internal alkyne compound.

e) Synthesis of homoallylic alcohol

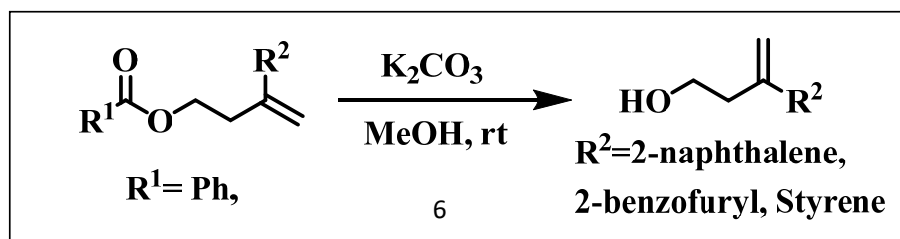

To a 25 mL round bottom flask was added 3-(naphthalen-2-yl)but-3-en-1-yl benzoate (0.060 g, 0.2 mmol),  $K_2CO_3$  (0.055 g, 0.4 mmol) and MeOH 5 mL. The resulting mixture was stirred at room temperature. After completion of the reaction, the reaction mixture was evaporated on a rotatory evaporator and then extracted with ethyl acetate-water system, and the organic layer was separated and evaporated under reduced pressure. The crude residue was then subjected to flash column chromatography on silica gel (eluent hexane-ethyl acetate) to obtain the pure homoallylic alcohol.

**f) Synthesis of (2-((2-Phenylallyl)oxy)phenyl)methanol**

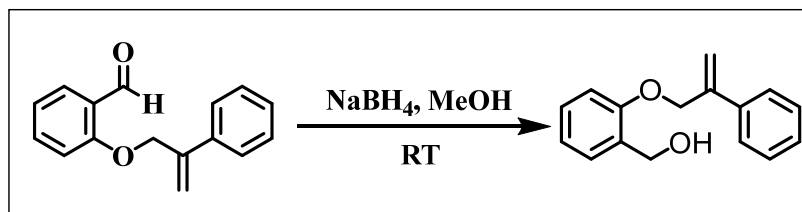

To a 25 mL round bottom flask **3a** (0.095 g, 0.4 mmol) and 2 mL MeOH were added. Next,  $NaBH_4$  (0.030 g, 0.8 mmol) was added, and the resulting solution was stirred at room temperature for 1 h. The reaction mixture was quenched with ammonium chloride solution, and the organic layer was separated and evaporated under reduced pressure. The crude product was subjected to flash column chromatography on silica gel (eluent hexane-ethyl acetate) to obtain the pure target compound.

**g) Synthesis of 2-((2-Phenylallyl)oxy)benzonitrile**

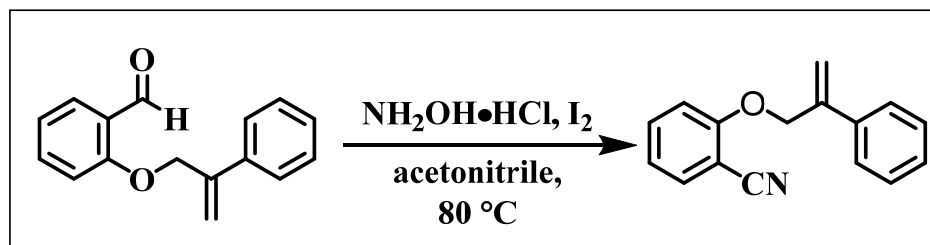

To a 25 mL round bottom flask **3a** (0.095 g, 0.4 mmol), and 5 mL acetonitrile were added. Next,  $NH_2OH.HCl$  (0.083 g, 1.2 mmol) and Iodine (0.030 g, 0.12 mmol) were added, and the

resulting solution was refluxed for 6 h. The resulting reaction mixture was quenched with cold water, and the organic layer was separated and evaporated under reduced pressure. The crude product was subjected to flash column chromatography on silica gel (eluent hexane-ethyl acetate) to obtain the pure target compound.

#### h) Synthesis of 1-((2-Phenylallyl)oxy)-2-vinylbenzene

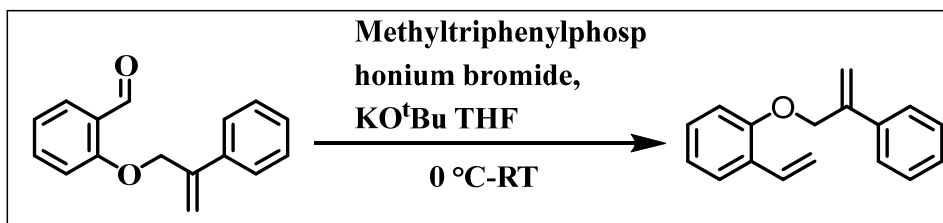

To a 25 mL round bottom flask Methyltriphenylphosphonium bromide (0.171 g, 0.48 mmol) and dry THF 5 mL were added under an inert atmosphere further Potassium tert-butoxide (0.089 g, 0.8 mmol) was added and reaction mixture was allowed to stir 1 h. Next, **3a** (0.095 g, 0.4 mmol) was added, and the resulting mixture was stirred at room temperature for 6 h. The reaction mixture was quenched with crushed ice, and the organic layer was separated and evaporated under reduced pressure. The crude product was subjected to flash column chromatography on silica gel (100 % hexane) to obtain the pure product.

#### i) Synthesis of (*E*)-1-(2-Nitrovinyl)-2-((2-phenylallyl)oxy)benzene

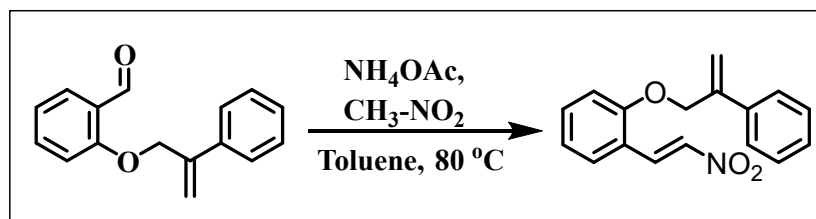

To a 25 mL round bottom flask **3a** (0.095 g, 0.4 mmol) and toluene 5 mL were added. Then NH<sub>4</sub>OAc (0.062 g, 0.8 mmol) and nitromethane (0.037 g, 0.6 mmol) were added, and the reaction mixture was refluxed for 4 h. Next, the resulting mixture was quenched with water, and the organic layer was separated and evaporated under reduced pressure. The crude product was subjected to flash column chromatography on silica gel (eluent hexane-ethyl acetate) to obtain the pure product.



## j) Synthesis of deuterated Phenylboronic acid<sup>5</sup>

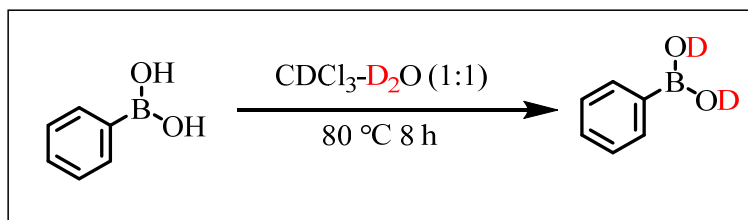

To a 25 mL round bottom flask was added Phenyl boronic Acid (0.610 g, 5.0 mmol,) and CDCl<sub>3</sub>-D<sub>2</sub>O (1:1) 3 mL. Then resulting solution was refluxed at 80 °C for 8 h in an oil bath. The reaction mixture was cooled and deuterated phenyl boronic acid was obtained. After filtration, the white solid was dried by using a high vacuum for 5 h. Deuterated phenylboronic acid (0.390 g, 63%, >85% D) was obtained. <sup>1</sup>H NMR (400 MHz, DMSO-d<sub>6</sub>) δ 7.90 – 7.78 (m, 2H), 7.42 – 7.30 (m, 3H), 8.02 (s, 0.30).

## General Procedures-

### [A] Palladium (II)-Catalyzed regioselective hydroarylation of terminal alkyne:

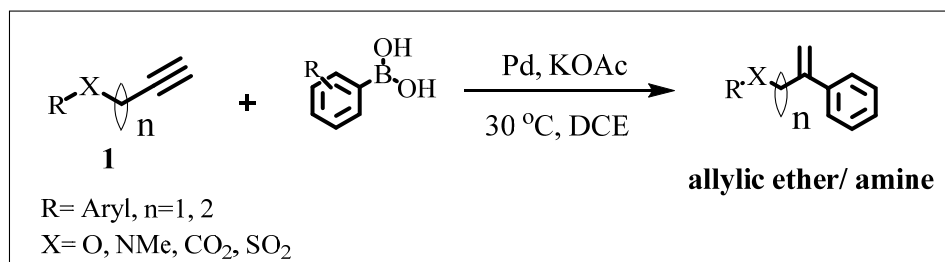

A 10 mL round bottom flask fitted with a septum containing alkyne substrate **1** (0.4 mmol), phenylboronic acid **2a** (0.073 g, 0.6 mmol) and KOAc (0.078 g, 0.8 mmol, 2 equiv), finally the catalyst PdCl<sub>2</sub>(PPh<sub>3</sub>)<sub>2</sub> (0.0084 g, 3 mol %) was added. Then DCE (2.0 mL) solvent was added to the system and the reaction mixture was stirred at 30 °C for 2-5 h. At the end of the reaction, the reaction mixture was filtered on a celite pad with CH<sub>2</sub>Cl<sub>2</sub> (10 mL) solvent. The crude products were purified by silica gel column chromatography using n-hexane/EtOAc as eluent to afford the desired product.

## IV Control Experiments:

### a) without heteroatom

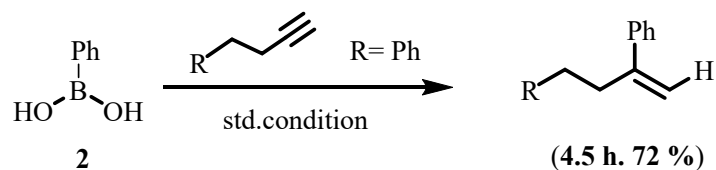

### b) with internal alkyne

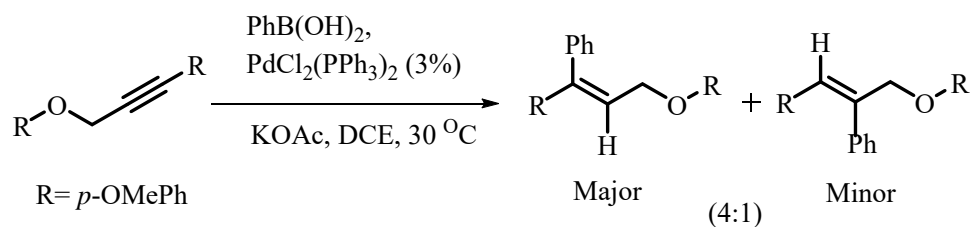

### c) with D<sub>2</sub>O

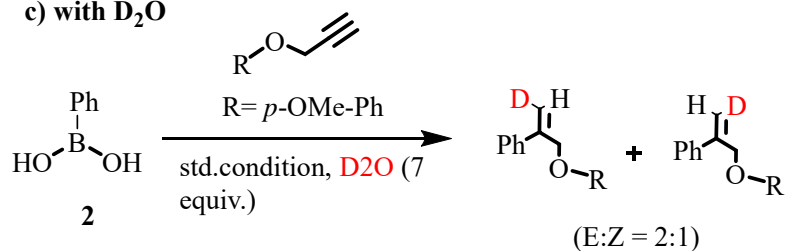

### d) with PhB(OD)<sub>2</sub>

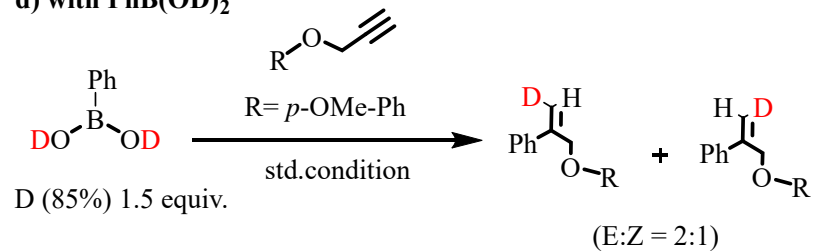

a) Studies with D<sub>2</sub>O-<sup>6</sup>

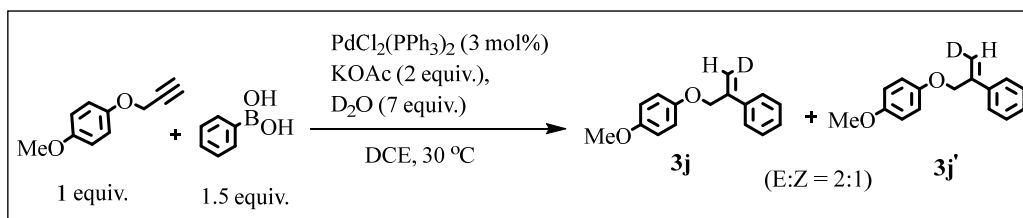

A 10 mL round bottom flask fitted with a septum containing 1-methoxy-4-(prop-2-yn-1-yloxy)benzene (0.065 g, 0.4 mmol), phenylboronic acid **2** (0.073 g, 0.6 mmol), KOAc (0.078 g, 0.8 mmol, 2 equiv) and D<sub>2</sub>O (7 equiv., 2.8 mmol) finally catalyst PdCl<sub>2</sub>(PPh<sub>3</sub>)<sub>2</sub> (0.0084, 3 mol %) was added, then DCE (2.0 mL) solvent was added to the system, and the reaction mixture was stirred at 30 °C for 1.5 h. At the end of the reaction, the reaction mixture was filtered on a celite pad with CH<sub>2</sub>Cl<sub>2</sub> (10 mL) solvent. The crude products were purified by silica gel column chromatography using n-hexane/ EtOAc as eluent to afford desired products **3j** and **3j'** (E:Z= 2:1).

b) Studies with PhB(OD)<sub>2</sub>-<sup>6</sup>

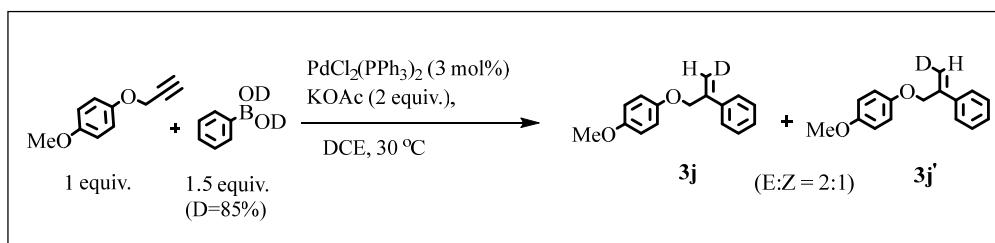

A 10 mL round bottom flask fitted with a septum containing 1-methoxy-4-(prop-2-yn-1-yloxy)benzene (0.065 g, 0.4 mmol), phenylboronic acid-*d*<sub>2</sub> (D=85%) (0.087 g, 0.6 mmol) and KOAc (0.078 g, 0.8 mmol, 2 equiv), finally catalyst PdCl<sub>2</sub>(PPh<sub>3</sub>)<sub>2</sub> (3 mol %) was added to the system then DCE (2.0 mL) solvent was added and the reaction mixture was stirred at 30 °C for 1.5 h. At the end of the reaction, the reaction mixture was filtered on a celite pad with CH<sub>2</sub>Cl<sub>2</sub> (10 mL) solvent. The crude products were purified by silica gel column chromatography using n-hexane/ EtOAc as eluent to afford desired products **3j** and **3j'** (E:Z= 2:1).

**Deuteration % calculation-<sup>7</sup>**

The equation below was used to determine the % of deuterium incorporation in allylic ether.

$$\% \text{ deuteration} = 100 - \left[ \left( \frac{\text{residual integral}}{\text{no. labelling sites}} \right) \times 100 \right]$$

This experiment concluded boronic acid has more percentage of proton donor than water.

### Studies with D<sub>2</sub>O and PhB(OD)<sub>2</sub>

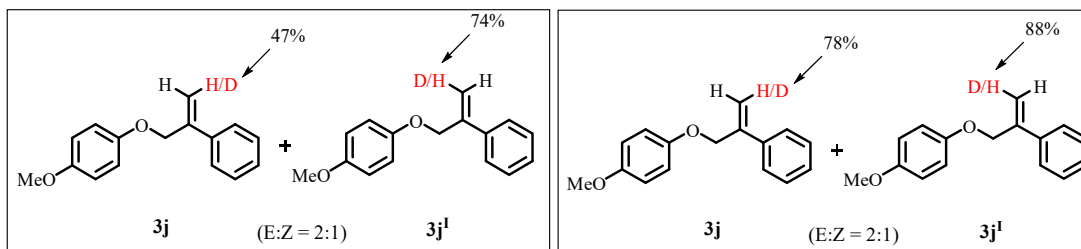

### c) Studies with D<sub>2</sub>O-

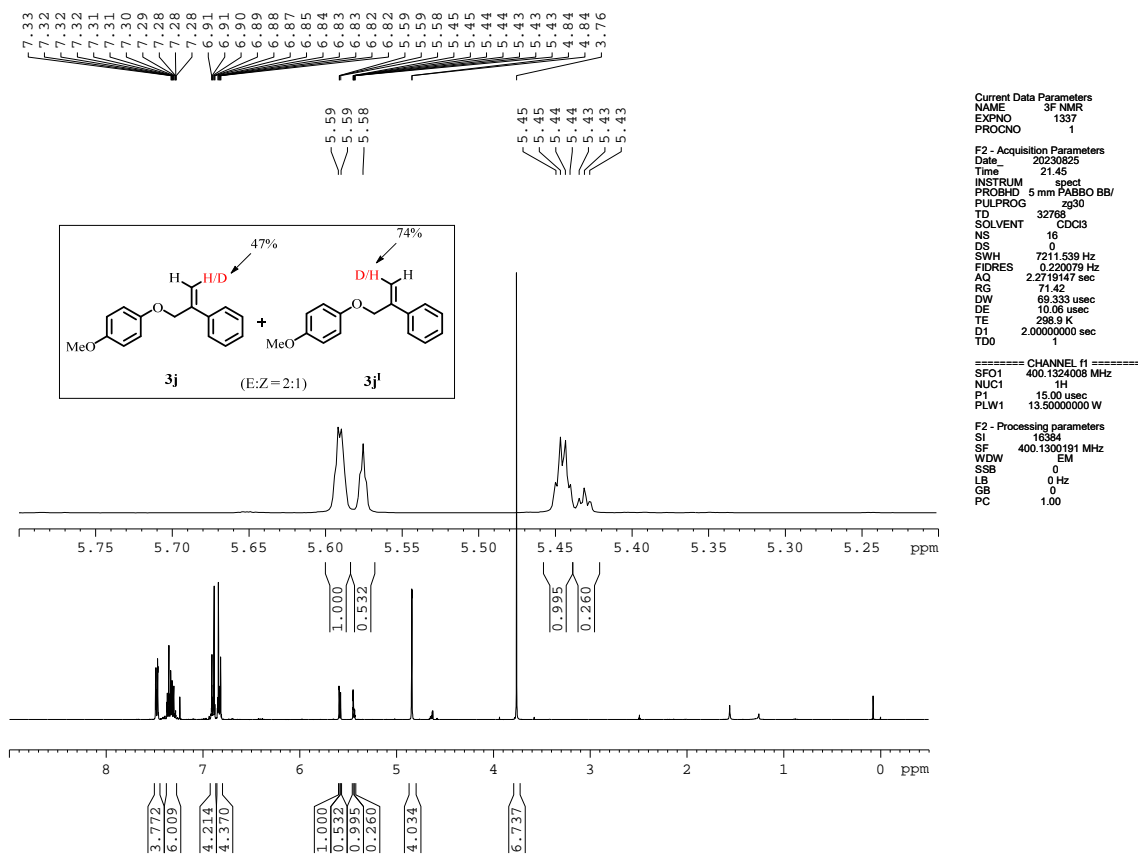

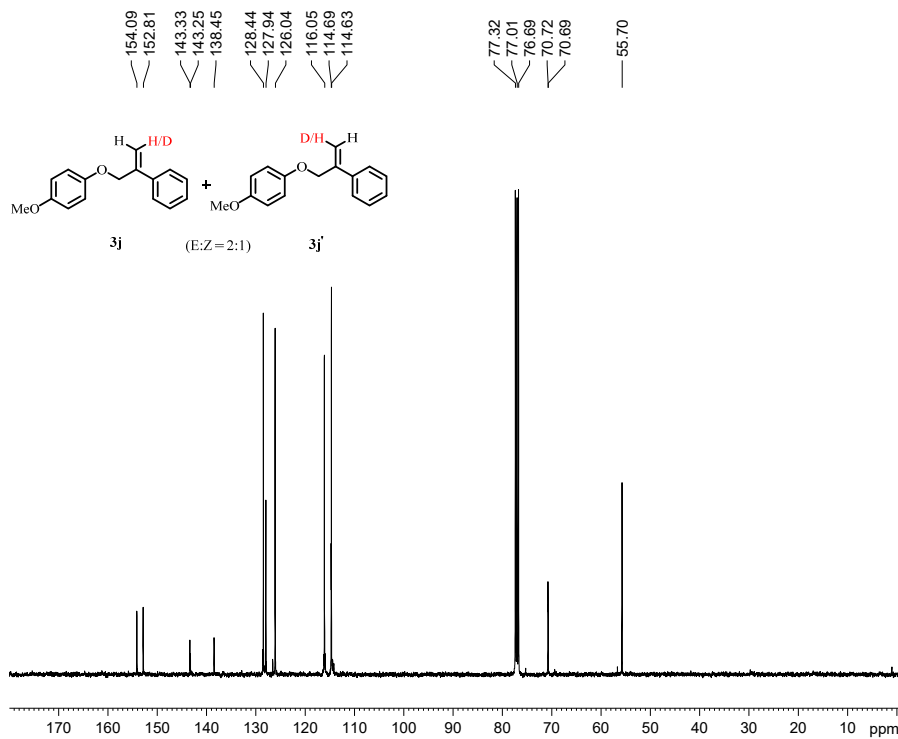

Current Data Parameters  
 NAME 3F NMR  
 EXPNO 1338  
 PROCNO 1

F2 - Acquisition Parameters  
 Date\_ 20230825  
 Time 21.49  
 INSTRUM spect  
 PROBHD 5 mm PABBO BB/  
 PULPROG zgpg30  
 TD 32768  
 SOLVENT CDCl3  
 NS 673  
 DS 0  
 SWH 24038.461 Hz  
 FIDRES 0.733596 Hz  
 AQ 0.6815744 sec  
 RG 198.09  
 DW 20.800 usec  
 DE 6.50 usec  
 TE 299.1 K  
 D1 2.0000000 sec  
 D11 0.0300000 sec  
 TDO 1

===== CHANNEL f1 =====  
 SFO1 100.6228298 MHz  
 NUC1 13C  
 P1 10.00 usec  
 PLW1 49.5000000 W

===== CHANNEL f2 =====  
 SFO2 400.1316005 MHz  
 NUC2 1H  
 CPDPRG2 waltz16  
 PCPD2 90.00 usec  
 PLW2 12.5000000 W  
 PLW12 0.34722000 W  
 PLW13 0.28125000 W

F2 - Processing parameters  
 SI 32768  
 SF 100.6127718 MHz  
 WDW EM  
 SSB 0  
 LB 2.00 Hz  
 GB 0  
 PC 1.00

d) Studies with PhB(OD)<sub>2</sub>-

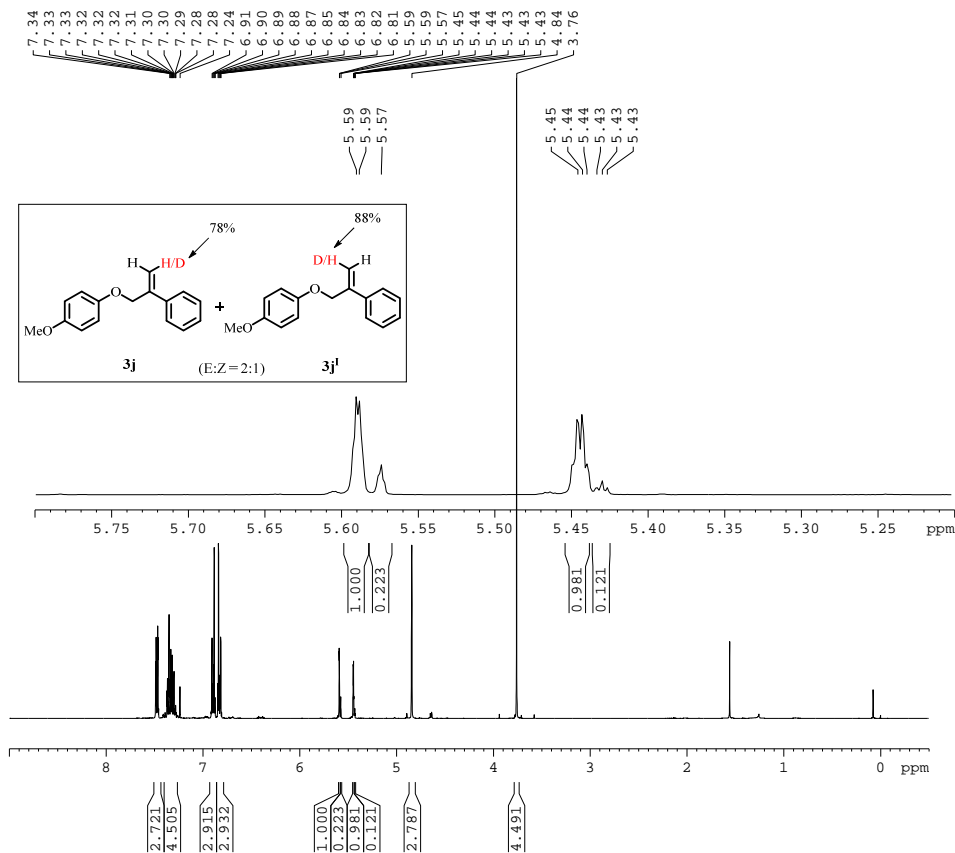

Current Data Parameters  
 NAME 3F NMR  
 EXPNO 1339  
 PROCNO 1

F2 - Acquisition Parameters  
 Date\_ 20230825  
 Time 22.24  
 INSTRUM spect  
 PROBHD 5 mm PABBO BB/  
 PULPROG zg30  
 TD 32768  
 SOLVENT CDCl3  
 NS 16  
 DS 0  
 SWH 7211.539 Hz  
 FIDRES 0.220079 Hz  
 AQ 2.2719147 sec  
 RG 78.51  
 DW 69.333 usec  
 DE 10.06 usec  
 TE 299.2 K  
 D1 2.0000000 sec  
 TDO 1

===== CHANNEL f1 =====  
 SFO1 400.1324008 MHz  
 NUC1 1H  
 P1 15.00 usec  
 PLW1 13.5000000 W

F2 - Processing parameters  
 SI 16384  
 SF 400.1300193 MHz  
 WDW EM  
 SSB 0  
 LB 0 Hz  
 GB 0  
 PC 1.00

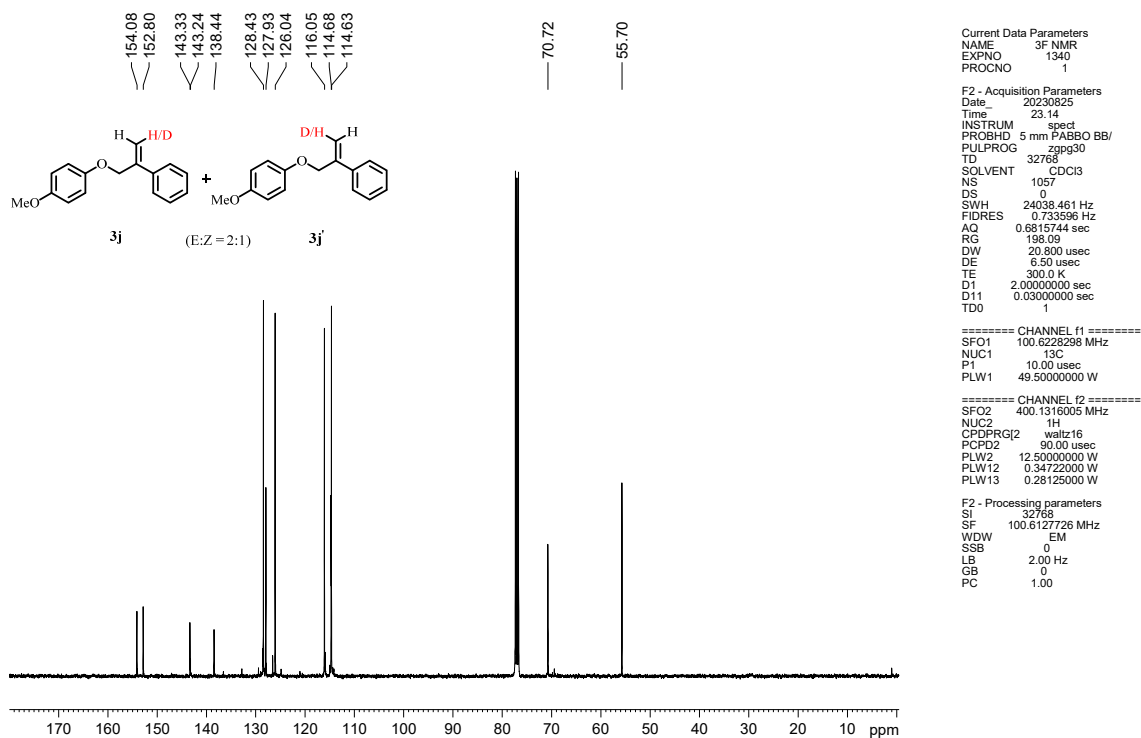

## Gram scale synthesis.

Optimized reaction conditions were applied for large scale and successfully achieved good to moderate yields.

### a) 10 mmol scale synthesis of allylic ether-

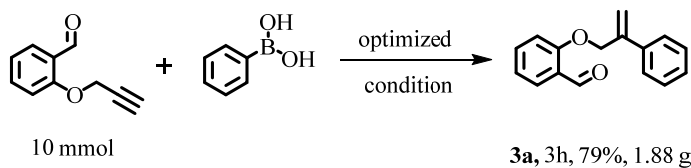

### b) 5 mmol scale synthesis of allylic amine-

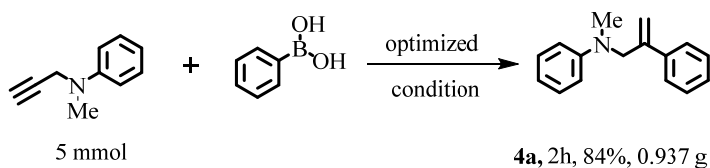

## Scale-up on 1 mmol.

### a) 1 mmol scale synthesis of allylic benzoate-

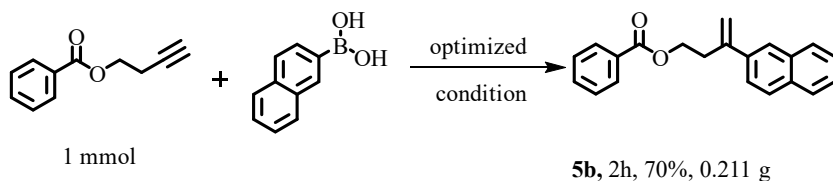

### b) 1 mmol scale synthesis of allylic benzoate-

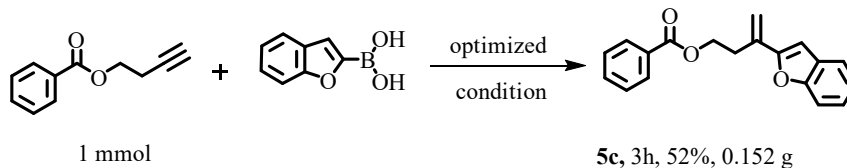

### c) 1 mmol scale synthesis of diene derivative-

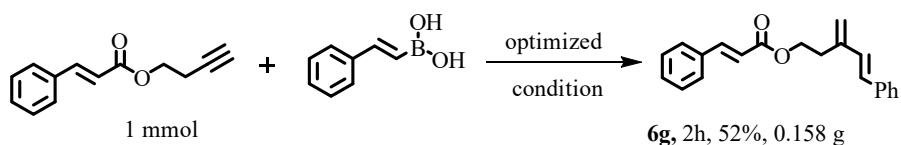

## V. Single crystal X-ray Analytical Data

The Single crystals of isolated compounds **3a** and **6f** were obtained by slow evaporation of dichloromethane: hexane (1:2) solution at room temperature. X-ray reflections were collected using Mo K $\alpha$  X-radiation ( $\lambda = 0.71073 \text{ \AA}$ ) on the single crystals at 200 K using a Bruker Kappa APEX-II diffractometer. All the crystal structures were solved and refined using SHELX-97.

- Crystal data and structure refinement for **3a** [CCDC number 2290697]. (ellipsoid counter 30% probability)

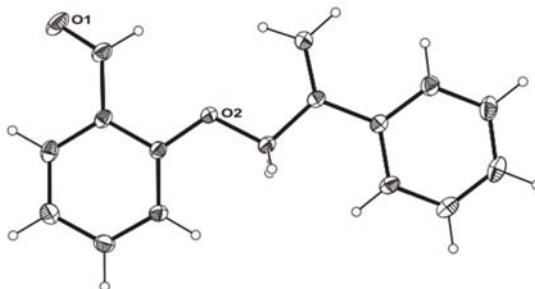

Table 1. Crystal data and structure refinement for d24491.

|                                   |                                                |          |
|-----------------------------------|------------------------------------------------|----------|
| Identification code               | d24491                                         |          |
| Empirical formula                 | C <sub>16</sub> H <sub>14</sub> O <sub>2</sub> |          |
| Formula weight                    | 238.27                                         |          |
| Temperature                       | 200(2) K                                       |          |
| Wavelength                        | 0.71073 Å                                      |          |
| Crystal system                    | Orthorhombic                                   |          |
| Space group                       | P n a 21                                       |          |
| Unit cell dimensions              | a = 16.5657(15) Å                              | α = 90°. |
|                                   | b = 5.4295(4) Å                                | β = 90°. |
|                                   | c = 14.0697(11) Å                              | γ = 90°. |
| Volume                            | 1265.48(18) Å <sup>3</sup>                     |          |
| Z                                 | 4                                              |          |
| Density (calculated)              | 1.251 Mg/m <sup>3</sup>                        |          |
| Absorption coefficient            | 0.081 mm <sup>-1</sup>                         |          |
| F(000)                            | 504                                            |          |
| Crystal size                      | 0.72 x 0.06 x 0.02 mm <sup>3</sup>             |          |
| Theta range for data collection   | 2.46 to 25.26°.                                |          |
| Index ranges                      | -19<=h<=19, -6<=k<=5, -16<=l<=13               |          |
| Reflections collected             | 6361                                           |          |
| Independent reflections           | 1825 [R(int) = 0.1282]                         |          |
| Completeness to theta = 25.26°    | 99.0 %                                         |          |
| Absorption correction             | multi-scan                                     |          |
| Max. and min. transmission        | 0.9984 and 0.9437                              |          |
| Refinement method                 | Full-matrix least-squares on F <sup>2</sup>    |          |
| Data / restraints / parameters    | 1825 / 1 / 164                                 |          |
| Goodness-of-fit on F <sup>2</sup> | 1.028                                          |          |
| Final R indices [I>2sigma(I)]     | R1 = 0.0528, wR2 = 0.1200                      |          |
| R indices (all data)              | R1 = 0.0701, wR2 = 0.1313                      |          |
| Absolute structure parameter      | -4(2)                                          |          |
| Extinction coefficient            | 0.034(8)                                       |          |
| Largest diff. peak and hole       | 0.171 and -0.155 e.Å <sup>-3</sup>             |          |

- Crystal data and structure refinement for **6f** [CCDC number 2290696]. (ellipsoid counter 30% probability)



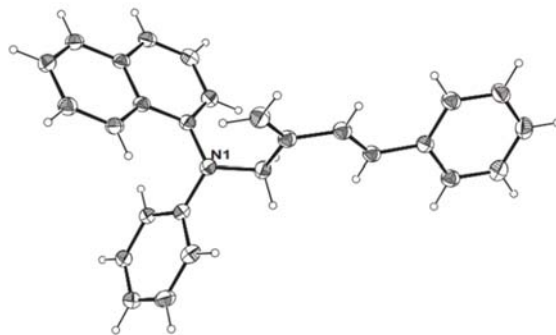

Table 1. Crystal data and structure refinement for d24673.

|                                   |                                                  |                   |
|-----------------------------------|--------------------------------------------------|-------------------|
| Identification code               | d24673                                           |                   |
| Empirical formula                 | C <sub>27</sub> H <sub>23</sub> N O <sub>0</sub> |                   |
| Formula weight                    | 361.46                                           |                   |
| Temperature                       | 200(2) K                                         |                   |
| Wavelength                        | 1.54178 Å                                        |                   |
| Crystal system                    | Monoclinic                                       |                   |
| Space group                       | P 21/n                                           |                   |
| Unit cell dimensions              | a = 9.4988(2) Å                                  | α = 90°.          |
|                                   | b = 11.9651(3) Å                                 | β = 97.1390(10)°. |
|                                   | c = 17.3667(4) Å                                 | γ = 90°.          |
| Volume                            | 1958.49(8) Å <sup>3</sup>                        |                   |
| Z                                 | 4                                                |                   |
| Density (calculated)              | 1.226 Mg/m <sup>3</sup>                          |                   |
| Absorption coefficient            | 0.534 mm <sup>-1</sup>                           |                   |
| F(000)                            | 768                                              |                   |
| Crystal size                      | 0.57 x 0.40 x 0.13 mm <sup>3</sup>               |                   |
| Theta range for data collection   | 5.98 to 66.74°.                                  |                   |
| Index ranges                      | -11 ≤ h ≤ 11, -14 ≤ k ≤ 14, -20 ≤ l ≤ 20         |                   |
| Reflections collected             | 14764                                            |                   |
| Independent reflections           | 3440 [R(int) = 0.0476]                           |                   |
| Completeness to theta = 66.74°    | 98.7 %                                           |                   |
| Absorption correction             | None                                             |                   |
| Max. and min. transmission        | 0.9338 and 0.7505                                |                   |
| Refinement method                 | Full-matrix least-squares on F <sup>2</sup>      |                   |
| Data / restraints / parameters    | 3440 / 0 / 253                                   |                   |
| Goodness-of-fit on F <sup>2</sup> | 1.041                                            |                   |
| Final R indices [I > 2σ(I)]       | R1 = 0.0492, wR2 = 0.1273                        |                   |
| R indices (all data)              | R1 = 0.0548, wR2 = 0.1342                        |                   |
| Largest diff. peak and hole       | 0.181 and -0.187 e.Å <sup>-3</sup>               |                   |

## VI. Spectral Data

### 2-(Prop-2-yn-1-yloxy)benzaldehyde (1a):<sup>1a</sup>

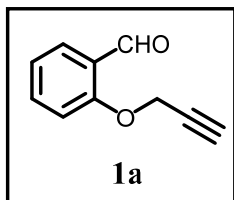

Eluent: n-hexane/ ethyl acetate (93/7); White solid; Yield: 1.21 g (76%); <sup>1</sup>H NMR (400 MHz, CDCl<sub>3</sub>): δ 10.49 (s, 1H), 7.87-7.85 (m, 1H), 7.59-7.55 (m, 1H), 7.13-7.07 (m, 2H), 4.83 (d, *J* = 4 Hz, 2H), 2.57 (t, *J* = 2 Hz, 1H).

### 4-Methoxy-2-(prop-2-yn-1-yloxy)benzaldehyde (1b):<sup>1b</sup>

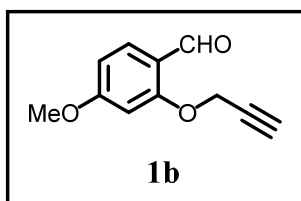

Eluent: n-hexane/ ethyl acetate (93/7); White solid; Yield: 1.36 g (72%); <sup>1</sup>H NMR (400 MHz, CDCl<sub>3</sub>): δ 10.30 (s, 1H), 7.84 (d, *J* = 8 Hz, 1H), 6.59 (d, *J* = 4 Hz, 2H), 4.80 (d, *J* = 2 Hz, 2H), 3.88 (s, 3H), 2.58 (t, *J* = 2 Hz, 1H).

### 4-(Prop-2-yn-1-yloxy)benzaldehyde (1c):<sup>1c</sup>

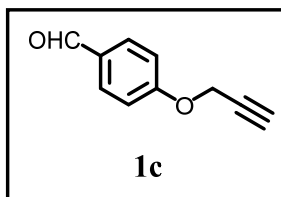

Eluent: n-hexane/ ethyl acetate (93/7); White solid; Yield: 1.02 g (64%); <sup>1</sup>H NMR (400 MHz, CDCl<sub>3</sub>): δ 9.90 (s, 1H), 7.86 (d, *J* = 8 Hz, 2H), 7.09 (d, *J* = 8 Hz, 2H), 4.78 (d, *J* = 2.4 Hz, 2H), 2.57 (t, *J* = 4 Hz 1H).

### 1-Methoxy-4-(prop-2-yn-1-yloxy)benzene (1d):<sup>1d</sup>

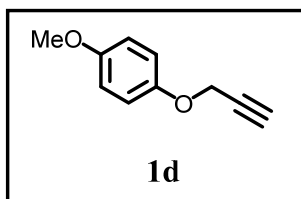

Eluent: n-hexane/ ethyl acetate (90/5); Yellow liquid; Yield: 1.36 g (84%); <sup>1</sup>H NMR (400 MHz, CDCl<sub>3</sub>): δ 6.93-6.90 (m, 2H), 6.86-6.83 (m, 2H), 4.63 (d, *J* = 2 Hz, 2H), 3.77 (s, 3H), 2.50 (t, *J* = 2 Hz 1H).

### 1,3-Dimethoxy-5-(prop-2-yn-1-yloxy)benzene (1e):<sup>1e</sup>

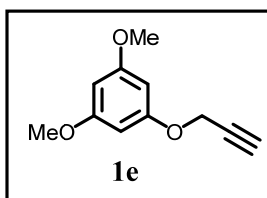

Eluent: n-hexane/ ethyl acetate (94/6); Gray solid; Yield: 1.11 g (58%); <sup>1</sup>H NMR (400 MHz, CDCl<sub>3</sub>): δ 6.15 (d, *J* = 8 Hz, 2H), 6.12 (d, *J* = 4 Hz, 1H), 4.64 (q, *J* = 1 Hz 2H), 3.76 (d, *J* = 1 Hz 6H), 2.52 (q, *J* = 4 Hz 1H).

**N,N-Dimethyl-3-(prop-2-yn-1-yloxy)aniline (1f):**<sup>1c</sup>

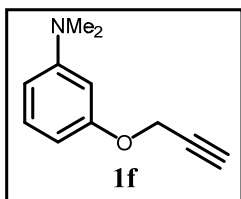

Eluent: n-hexane/ ethyl acetate (95/5); White solid; Yield: 1.15 g (66%); <sup>1</sup>H NMR (400 MHz, CDCl<sub>3</sub>): δ 7.17-7.13 (m, 1H), 6.40-6.28 (m, 3H), 4.67 (d, *J* = 2 Hz, 2H), 2.93 (s, 6H), 2.50 (t, *J* = 2 Hz 1H).

**1-(Prop-2-yn-1-yloxy)naphthalene (1g):**<sup>1c</sup>

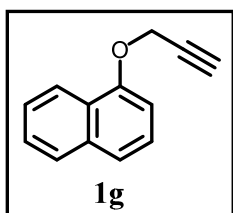

Eluent: n-hexane/ ethyl acetate (97/3); colorless liquid; Yield: 1.41 g (78%); <sup>1</sup>H NMR (400 MHz, CDCl<sub>3</sub>): δ 8.26 (t, *J* = 8 Hz, 1H), 7.80-7.78 (m, 1H), 7.50-7.45 (m, 3H), 7.37 (t, *J* = 8 Hz, 1H), 6.93 (d, *J* = 8 Hz, 1H), 4.88 (d, *J* = 2 Hz, 2H), 2.54 (t, *J* = 2 Hz 1H).

**2-(Prop-2-yn-1-yloxy)naphthalene (1h):**<sup>1f</sup>

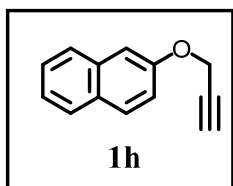

Eluent: n-hexane/ ethyl acetate (97/3); Gray solid; Yield: 1.25 g (69%); <sup>1</sup>H NMR (400 MHz, CDCl<sub>3</sub>): δ 7.78-7.74 (m, 3H), 7.46-7.42 (m, 1H), 7.37-7.33 (m, 1H), 7.23 (d, *J* = 4 Hz, 1H), 7.20-7.17 (m, 1H), 4.80 (d, *J* = 4 Hz, 2H), 2.55 (t, *J* = 2 Hz 1H).

**1-Chloro-4-(1-(prop-2-yn-1-yloxy)ethyl)benzene (1i):**

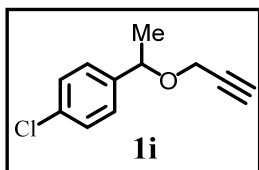

Eluent: n-hexane/ ethyl acetate (97/3); colorless liquid; Yield: 0.5 g (86%); <sup>1</sup>H NMR (400 MHz, CDCl<sub>3</sub>): δ 7.33-7.30 (m, 2H), 7.28-7.25 (m, 2H), 4.64 (q, *J* = 4 Hz, 1H), 4.07 (dd, *J* = 12 Hz, 4 Hz, 1H), 3.86 (dd, *J* = 12 Hz, 4 Hz, 1H), 2.40 (t, *J* = 4 Hz 1H), 1.44 (d, *J* = 4 Hz, 3H), <sup>13</sup>C NMR (100 MHz, CDCl<sub>3</sub>): δ 141.0, 133.4, 128.7, 127.8, 79.7, 75.9,

74.2, 55.5, 23.6; HRMS (EI) *m/z* calcd. For [M]<sup>+</sup> C<sub>11</sub>H<sub>11</sub>ClO 194.0498, found 194.0487.

**((Prop-2-yn-1-yloxy)methylene)dibenzene (1j):**<sup>2a</sup>

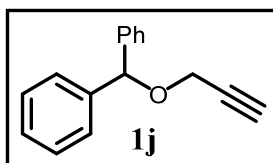

Eluent: n-hexane/ ethyl acetate (95/5); Yellow solid; Yield: 0.47 g (71%); <sup>1</sup>H NMR (400 MHz, CDCl<sub>3</sub>): δ 7.34-7.25 (m, 10H), 5.66 (s, 1H), 4.15 (s, 2H), 2.44 (s, 1H).

**((Prop-2-yn-1-yloxy)methanetriyl)tribenzene (1k):**<sup>2b</sup>

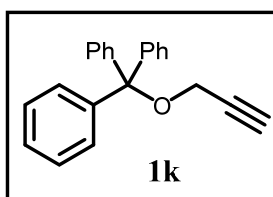

Eluent: n-hexane/ ethyl acetate (95/5); White solid; Yield: 0.46 g (52%); <sup>1</sup>H NMR (400 MHz, CDCl<sub>3</sub>): δ 7.47-7.44 (m, 5H), 7.33-7.28 (m, 5H), 7.26-7.22 (m, 5H), 3.74 (d, *J* = 2 Hz, 2H), 2.38 (t, *J* = 2 Hz 1H).

**N-methyl-N-(prop-2-yn-1-yl)aniline (1l):**<sup>2c</sup>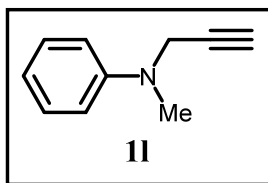

Eluent: n-hexane/ ethyl acetate (97/3); brownish liquid; Yield: 1.7 g (81%); <sup>1</sup>H NMR (400 MHz, CDCl<sub>3</sub>): δ 7.28-7.24 (m, 2H), 6.87-6.79 (m, 3H), 4.04 (d, *J* = 2 Hz, 2H), 2.97 (s, 3H), 2.16 (t, *J* = 2 Hz, 1H).

**4-Isopropyl-N-methyl-N-(prop-2-yn-1-yl)aniline (1m):**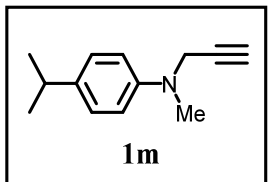

Eluent: n-hexane/ ethyl acetate (96/4); colorless liquid; Yield: 0.35 g (64%); <sup>1</sup>H NMR (400 MHz, CDCl<sub>3</sub>): δ 7.13 (d, *J* = 8 Hz, 2H), 6.82 (d, *J* = 8 Hz, 2H), 4.02 (d, *J* = 1 Hz, 2H), 2.94 (s, 3H), 2.87-2.80 (m, 1H), 2.17 (t, *J* = 2 Hz, 1H), 1.22 (d, *J* = 8 Hz, 6 H); <sup>13</sup>C NMR (100 MHz, CDCl<sub>3</sub>): δ 147.0, 139.0, 127.0, 114.7, 79.3, 72.1, 42.8, 38.8, 33.1, 24.1;

**HRMS (EI)** *m/z* calcd. For [M]<sup>+</sup> C<sub>13</sub>H<sub>17</sub>N 187.1361, found 187.1357.

**N-Phenyl-N-(prop-2-yn-1-yl)naphthalen-1-amine (1n):**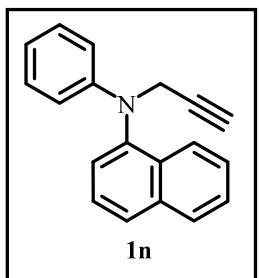

Eluent: n-hexane/ ethyl acetate (95/5); Brown liquid; Yield: 0.59 g (77%); <sup>1</sup>H NMR (400 MHz, CDCl<sub>3</sub>): δ 7.95 (d, *J* = 12 Hz, 1H), 7.90 (d, *J* = 12 Hz, 1H), 7.81 (d, *J* = 8 Hz, 1H), 7.53-7.41 (m, 4H), 7.20-7.15 (m, 2H), 6.78 (d, *J* = 8 Hz, 1H), 6.72 (d, *J* = 8 Hz, 2H), 4.45 (d, *J* = 2 Hz, 2H), 2.27 (t, *J* = 2 Hz, 1H); <sup>13</sup>C NMR (100 MHz, CDCl<sub>3</sub>): δ 148.29, 143.63, 135.02, 131.31, 128.88, 128.40, 127.17, 126.51, 126.33, 126.28, 125.99, 123.53, 118.32, 114.49, 80.11, 72.49, 41.77 ; **HRMS**

**(EI)** *m/z* calcd. For [M]<sup>+</sup> C<sub>19</sub>H<sub>15</sub>N 257.1204, found 257.1202.

**2-((Prop-2-yn-1-yloxy)methyl)furan (1o):**<sup>2d</sup>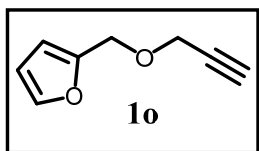

Eluent: n-hexane/ ethyl acetate (96/4); brownish liquid; Yield: 0.27 g (68%); <sup>1</sup>H NMR (400 MHz, CDCl<sub>3</sub>): δ 7.42 (s, 1H), 6.38-6.34 (m, 2H), 4.56 (s, 2H); 4.16 (d, *J* = 2 Hz, 2H), 2.46 (t, *J* = 2 Hz, 1H).

**But-3-yn-1-yl benzoate (1p):**<sup>1f</sup>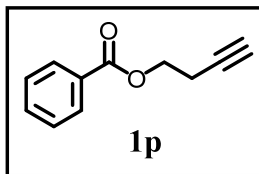

Eluent: n-hexane/ ethyl acetate (98/2); colorless liquid; Yield: 0.72 g (83%); <sup>1</sup>H NMR (400 MHz, CDCl<sub>3</sub>): δ 8.06 (d, *J* = 4 Hz, 2H), 7.57 (t, *J* = 8 Hz, 1H), 7.44 (d, *J* = 8 Hz, 2H), 4.43 (t, *J* = 8 Hz, 2H), 2.69-2.65 (m, 2H), 2.04-2.02 (m, 1H).

**But-3-yn-1-yl cinnamate (1q):**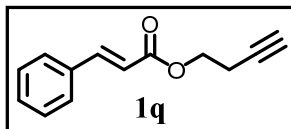

Eluent: n-hexane/ ethyl acetate (96/4); colorless liquid; Yield: 0.68 g (62%); <sup>1</sup>H NMR (400 MHz, CDCl<sub>3</sub>): δ 7.71(d, *J* = 16 Hz, 1H), 7.54-7.51 (m, 2H), 7.39-7.37 (m, 3H), 6.45 (d, *J* = 16 Hz, 1H), 4.32

(t,  $J = 4$  Hz, 2H), 2.63-2.59 (m, 2H), 2.03 (t,  $J = 4$  Hz, 1H);  $^{13}\text{C NMR}$  (100 MHz,  $\text{CDCl}_3$ ):  $\delta$  166.6, 145.2, 134.3, 130.3, 128.86, 128.09, 117.6, 80.1, 69.9, 62.1, 19.0; **HRMS (EI)**  $m/z$  calcd. For  $[\text{M}]^+$   $\text{C}_{13}\text{H}_{12}\text{O}_2$  200.0837, found 200.0838.

#### But-3-yn-1-yl 3-phenylpropanoate (**1r**):<sup>3</sup>

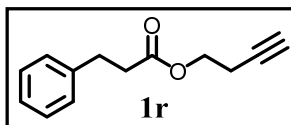

Eluent: n-hexane/ ethyl acetate (97/3); colorless liquid; Yield: 0.59 g (59%);  $^1\text{H NMR}$  (400 MHz,  $\text{CDCl}_3$ ):  $\delta$  7.31-7.25 (m, 2H), 7.21-7.17 (m, 3H), 4.18 (t,  $J = 8$  Hz, 2H), 2.96 (t,  $J = 8$  Hz, 2H), 2.67-2.64 (m, 2H), 2.51-2.47 (m, 2H), 1.98 (t,  $J = 4$  Hz, 1H).

#### But-3-yn-1-yl benzenesulfonate (**1s**):

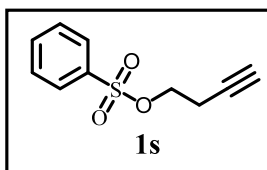

Eluent: n-hexane/ ethyl acetate (97/3); colorless liquid; Yield: 0.81 g (78%);  $^1\text{H NMR}$  (400 MHz,  $\text{CDCl}_3$ ):  $\delta$  7.95-7.92 (m, 2H), 7.69-7.65 (m, 1H), 7.59-7.55 (m, 2H), 4.14 (t,  $J = 8$  Hz, 1H), 2.59-2.55 (m, 2H), 1.96 (t,  $J = 4$  Hz, 1H);  $^{13}\text{C NMR}$  (100 MHz,  $\text{CDCl}_3$ ):  $\delta$  135.8, 133.8, 129.2, 127.8, 78.2, 70.7, 67.5, 19.3; **HRMS (EI)**  $m/z$  calcd. For  $[\text{M}]^+$

$\text{C}_{10}\text{H}_{10}\text{O}_3\text{S}$  210.0350, found 210.0346.

#### 1,3-Bis(prop-2-yn-1-yloxy)benzene (**1t**):<sup>8</sup>

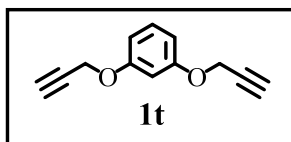

Eluent: n-hexane/ ethyl acetate (95/5); colorless liquid; Yield: 0.56 g (61%);  $^1\text{H NMR}$  (400 MHz,  $\text{CDCl}_3$ ):  $\delta$  7.23-7.19 (m, 1H), 7.63-7.61 (m, 3H), 4.67(d,  $J = 1$  Hz, 4H), 2.52 (t,  $J = 4$  Hz, 2H).

#### 1-methoxy-4-(3-(4-methoxyphenoxy)prop-1-yn-1-yl)benzene (**1u**):<sup>4</sup>

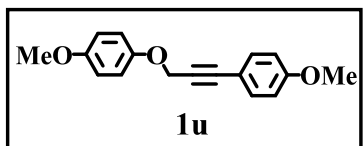

Eluent: n-hexane/ ethyl acetate (97/3); White solid; Yield: 0.73 g (69%);  $^1\text{H NMR}$  (400 MHz,  $\text{CDCl}_3$ ):  $\delta$  7.35-7.39 (m, 2H), 6.95-6.99 (m, 2H), 6.80-6.87 (m, 4H), 4.84 (s, 2H), 3.80 (s, 3H), 3.77 (s, 3H).

#### 2-((2-Phenylallyl)oxy)benzaldehyde (**3a**):<sup>9</sup>

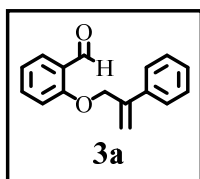

Eluent: n-hexane/ ethyl acetate (97/3); White solid; Yield: 90.4 mg (95%); M.p.: 55 °C;  $^1\text{H NMR}$  (400 MHz,  $\text{CDCl}_3$ ):  $\delta$  10.38 (s, 1H), 7.83 (dd,  $J = 8.2$  Hz, 2 Hz, 1H), 7.57-7.52 (m, 1H), 7.45-7.44 (m, 2H), 7.39-7.32 (m, 3H), 7.07-7.02 (m, 2H), 5.63 (s, 1H), 5.49 (s, 1H), 5.03 (s, 2H);  $^{13}\text{C NMR}$  (100 MHz,  $\text{CDCl}_3$ ):  $\delta$  189.7, 160.8, 142.6, 137.9, 135.8, 128.6, 128.4, 128.2,

126.0, 125.3, 121.1, 115.2, 113.1, 70.3; **HRMS (EI)**  $m/z$  calcd. For  $[\text{M}]^+$   $\text{C}_{16}\text{H}_{14}\text{O}_2$  238.0993, found 238.0992.

### 2-((2-(3-Chlorophenyl)allyl)oxy)benzaldehyde (3b):

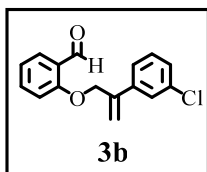

Eluent: n-hexane/ ethyl acetate (97/3); White solid; Yield: 82.6 mg (76%); M.p.:58 °C;  $^1\text{H NMR}$  (400 MHz,  $\text{CDCl}_3$ ):  $\delta$  10.40 (s, 1H), 7.83 (dd,  $J = 8$  Hz, 2 Hz, 1H), 7.57-7.53 (m, 1H), 7.44-7.43 (m, 1H), 7.34-7.29 (m, 3H), 7.06 (t,  $J = 12$  Hz, 2H), 5.64 (s, 1H), 5.53 (s, 1H), 4.99 (s, 2H);  $^{13}\text{C NMR}$  (100 MHz,  $\text{CDCl}_3$ ):  $\delta$  189.5, 160.6, 141.5, 139.8, 135.8, 134.6, 129.8, 128.5, 128.3, 126.2, 125.3, 124.2, 121.2, 116.5, 113.0, 70.0; **HRMS (EI)**  $m/z$  calcd. For  $[\text{M}]^+$   $\text{C}_{16}\text{H}_{13}\text{ClO}_2$  272.0604, found 272.0612.

### 2-((2-(Naphthalen-1-yl)allyl)oxy)benzaldehyde (3c):

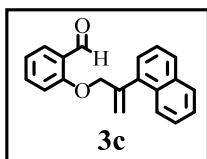

Eluent: n-hexane/ ethyl acetate (97/3); White solid; Yield: 110 mg (96%); M.p.:125 °C;  $^1\text{H NMR}$  (400 MHz,  $\text{CDCl}_3$ ):  $\delta$  10.40 (s, 1H), 8.06-8.02 (m, 1H), 7.89-7.85 (m, 1H), 7.84-7.80 (m, 2H), 7.52-7.46 (m, 4H), 7.37 (d,  $J = 8$  Hz, 1H), 7.03-6.97 (m, 2H), 5.86 (s, 1H), 5.42 (s, 1H), 4.94 (s, 2H);  $^{13}\text{C NMR}$  (100 MHz,  $\text{CDCl}_3$ ):  $\delta$  189.6, 160.7, 142.8, 137.2, 135.7, 133.6, 131.3, 128.4, 128.1, 126.2, 125.9, 125.8, 125.1, 125.1, 120.9, 117.8, 112.7, 71.5; **HRMS (EI)**  $m/z$  calcd. For  $[\text{M}]^+$   $\text{C}_{20}\text{H}_{16}\text{O}_2$  288.1150, found 288.1142.

### 4-Methoxy-2-((2-phenylallyl)oxy)benzaldehyde (3d):<sup>10</sup>

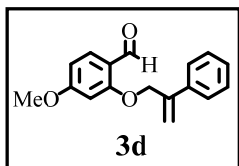

Eluent: n-hexane/ ethyl acetate (95/5); White solid; Yield: 84.6 mg (79%); M.p.:81 °C;  $^1\text{H NMR}$  (400 MHz,  $\text{CDCl}_3$ ):  $\delta$  10.22 (s, 1H), 7.81 (d,  $J = 8$  Hz, 1H), 7.46-7.43 (m, 2H), 7.38-7.29 (m, 3H), 6.5 (dd,  $J = 8$  Hz, 2H), 6.52 (d,  $J = 4$  Hz, 1H), 5.63 (s, 1H), 5.49 (s, 1H), 4.99 (s, 1H), 3.86 (s, 3H);  $^{13}\text{C NMR}$  (100 MHz,  $\text{CDCl}_3$ ):  $\delta$  188.1, 166.0, 162.5, 142.4, 137.9, 130.4, 128.5, 128.2, 126.0, 119.4, 115.2, 106.2, 99.2, 70.2, 55.6; **HRMS (EI)**  $m/z$  calcd. For  $[\text{M}]^+$   $\text{C}_{17}\text{H}_{16}\text{O}_3$  268.1099, found 268.1109.

### 4-((2-Phenylallyl)oxy)benzaldehyde (3e):

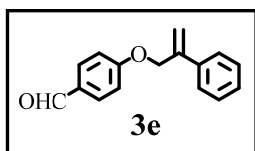

Eluent: n-hexane/ ethyl acetate (97/3); colorless liquid; Yield: 49.5 mg (52%);  $^1\text{H NMR}$  (400 MHz,  $\text{CDCl}_3$ ):  $\delta$  9.89 (s, 1H) 7.84 (d,  $J = 8$  Hz, 2H), 7.46 (d,  $J = 8$  Hz, 2H), 7.39-7.33 (m, 3H), 7.06 (d,  $J = 8$  Hz, 2H), 5.64 (s, 1H), 5.46 (s, 1H), 4.99 (s, 2H);  $^{13}\text{C NMR}$  (100 MHz,  $\text{CDCl}_3$ ):  $\delta$  190.7, 163.5, 142.2, 137.9, 131.9, 130.2, 128.5, 128.2, 126.0, 115.3, 115.1, 70.0; **HRMS (EI)**  $m/z$  calcd. For  $[\text{M}]^+$   $\text{C}_{16}\text{H}_{14}\text{O}_2$  238.0993, found 238.0991.

### 1,3-Dimethoxy-5-((2-phenylallyl)oxy)benzene (3f):

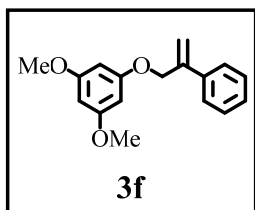

Eluent: n-hexane/ ethyl acetate (90/5); colorless liquid; Yield: 84.2 mg (78%);  $^1\text{H NMR}$  (400 MHz,  $\text{CDCl}_3$ ):  $\delta$  7.47 (d,  $J = 8$  Hz, 2H), 7.35-7.30 (m, 3H), 6.15-6.10 (m, 3H), 5.61 (s, 1H), 5.46 (s, 1H), 4.85 (s, 2H), 3.76 (s, 6H);  $^{13}\text{C NMR}$  (100 MHz,  $\text{CDCl}_3$ ):  $\delta$  161.5, 160.5, 142.9, 138.3, 128.0, 126.0, 115.0, 93.8, 93.3, 69.9, 55.3; **HRMS (EI)**  $m/z$  calcd. For  $[\text{M}]^+$   $\text{C}_{17}\text{H}_{18}\text{O}_3$  270.1255, found 270.1248.

### ***N,N*-Dimethyl-3-((2-phenylallyl)oxy)aniline (3g):**

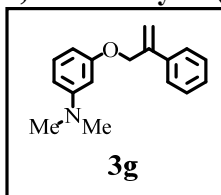

Eluent: n-hexane/ ethyl acetate (90/5); colorless liquid;; Yield: 76.9 mg (76%); M.p.:88 °C; <sup>1</sup>H NMR (400 MHz, CDCl<sub>3</sub>): δ 7.47 (d, *J* = 8 Hz, 2H), 7.36-7.27 (m, 3H), 7.14 (t, *J* = 8 Hz, 1H), 6.38-6.28 (m, 3H), 5.60 (s, 1H), 5.47 (s, 1H), 4.88 (s, 2H), 2.92 (s, 6H); <sup>13</sup>C NMR (100 MHz, CDCl<sub>3</sub>): δ 159.8, 152.0, 143.3, 138.5, 129.7, 128.4, 127.9, 126.0, 114.8, 106.0, 102.3, 100.2, 69.8, 40.6; **HRMS (EI)** m/z calcd. For [M]<sup>+</sup> C<sub>17</sub>H<sub>19</sub>NO 253.1466, found 253.1453.

### **1-((2-Phenylallyl)oxy)naphthalene (3h):**<sup>11</sup>

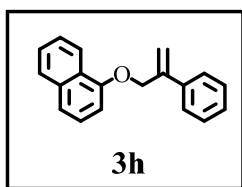

Eluent: n-hexane/ ethyl acetate (96/4); colorless liquid; Yield: 70.7 mg (68%); <sup>1</sup>H NMR (400 MHz, CDCl<sub>3</sub>): δ 8.23 (d, *J* = 8 Hz, 1H), 7.79 (d, *J* = 8 Hz, 1H), 7.53 (d, *J* = 8 Hz, 2H), 7.49-7.40 (m, 4H), 6.89 (d, *J* = 8 Hz, 1H), 5.66 (s, 1H), 5.59 (s, 1H), 5.06 (s, 2H); <sup>13</sup>C NMR (100 MHz, CDCl<sub>3</sub>): δ 154.3, 143.0, 138.4, 134.5, 128.4, 128.0, 127.4, 126.4, 126.0, 125.7, 125.2, 122.1, 120.5, 114.7, 105.1, 70.0; **HRMS (EI)** m/z calcd. For [M]<sup>+</sup> C<sub>19</sub>H<sub>16</sub>O 260.1201, found 260.1197.

### **2-((2-Phenylallyl)oxy)naphthalene (3i):**

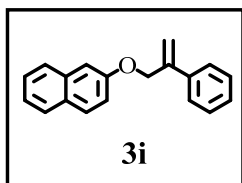

Eluent: n-hexane/ ethyl acetate (96/4); colorless liquid;; Yield: 56 mg (54%); <sup>1</sup>H NMR (400 MHz, CDCl<sub>3</sub>): δ 7.76-7.70 (m, 3H), 7.51-7.41 (m, 3H), 7.37-7.31 (m, 4H), 7.21 (s, 2H), 5.64 (s, 1H), 5.52 (s, 1H), 5.00 (s, 2H); <sup>13</sup>C NMR (100 MHz, CDCl<sub>3</sub>): δ 156.5, 142.9, 138.3, 134.4, 129.4, 129.1, 128.5, 128.0, 127.6, 126.7, 126.3, 126.0, 123.7, 119.0, 114.9, 107.3, 69.8; **HRMS (EI)** m/z calcd. For [M]<sup>+</sup> C<sub>19</sub>H<sub>16</sub>O 260.1201, found 260.1197.

### **1-Methoxy-4-((2-phenylallyl)oxy)benzene (3j):**<sup>12</sup>

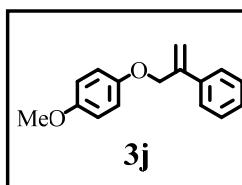

Eluent: n-hexane/ ethyl acetate (90/5); White solid; Yield: 72 mg (75%); M.p.:50 °C; <sup>1</sup>H NMR (400 MHz, CDCl<sub>3</sub>): δ 7.48-7.46 (m, 2H), 7.37-7.29 (m, 3H), 6.90-6.87 (m, 2H), 6.84-6.81 (m, 2H), 5.58 (s, 1H), 5.44 (d, *J* = 1.2 Hz, 1H), 4.48 (s, 2H), 3.75 (s, 3H); <sup>13</sup>C NMR (100 MHz, CDCl<sub>3</sub>): δ 154.0, 152.8, 143.3, 138.4, 128.4, 127.9, 126.0, 116.0, 114.75, 114.64, 70.72, 55.7; **HRMS (EI)** m/z calcd. For [M]<sup>+</sup> C<sub>16</sub>H<sub>16</sub>O<sub>2</sub> 240.1150, found 240.1152.

### **1-Methoxy-4-((2-(p-tolyl)allyl)oxy)benzene (3k):**

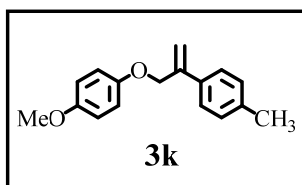

Eluent: n-hexane/ ethyl acetate (90/5); White solid; Yield: 59 mg (58%); M.p.:61 °C; <sup>1</sup>H NMR (400 MHz, CDCl<sub>3</sub>): δ 7.37 (d, *J* = 8 Hz, 2H), 7.16 (d, *J* = 8 Hz, 2H), 6.90-6.87 (m, 2H), 6.84-6.81 (m, 2H), 5.56 (s, 1H), 5.39 (s, 1H), 4.82 (s, 2H), 3.76 (s, 3H), 2.35 (s, 3H); <sup>13</sup>C NMR (100 MHz, CDCl<sub>3</sub>): δ 154.0, 152.8, 143.0, 137.7,

135.4, 129.1, 125.8, 116.0, 114.5, 113.8, 70.7, 55.6, 21.0; **HRMS (EI)**  $m/z$  calcd. For  $[M]^+$   $C_{17}H_{18}O_2$  254.1306, found 254.1316.

**1-(3-(4-Methoxyphenoxy)prop-1-en-2-yl)naphthalene (3l):**

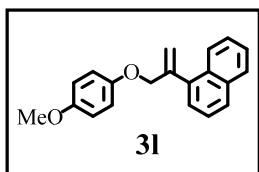

Eluent: n-hexane/ ethyl acetate (90/5); colorless liquid; Yield: 112.5 mg (97%);  $^1H$  NMR (400 MHz,  $CDCl_3$ ):  $\delta$  8.07-8.05 (m, 1H), 7.87-7.79 (m, 2H), 7.49-7.43 (m, 3H), 7.36 (d,  $J = 8$  Hz, 1H), 6.89-6.80 (m, 4H), 5.83 (s, 1H), 5.35 (s, 1H), 4.76 (s, 2H), 3.75 (s, 3H),  $^{13}C$  NMR (100 MHz,  $CDCl_3$ ):  $\delta$  154.0, 152.8, 147.7, 137.9, 133.7, 131.5, 128.3, 127.9, 126.1, 125.8, 125.4, 125.2, 116.7, 115.8, 114.6, 71.7, 55.7; **HRMS (EI)**  $m/z$  calcd. For  $[M]^+$   $C_{20}H_{18}O_2$  290.1306, found 290.1316.

**2-(3-(4-Methoxyphenoxy)prop-1-en-2-yl)benzofuran (3m):**

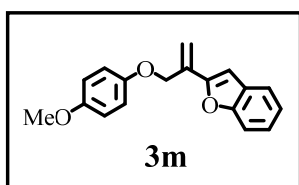

Eluent: n-hexane/ ethyl acetate (96/4); White solid; Yield: 65 mg (58%); M.p.: 57 °C;  $^1H$  NMR (400 MHz,  $CDCl_3$ ):  $\delta$  7.53 (d,  $J = 8$  Hz, 1H), 7.46 (d,  $J = 8$  Hz, 1H), 7.30-7.26 (m, 2H), 7.22-7.18 (m, 1H), 6.94-6.91 (m, 2H), 6.86-6.83 (m, 2H), 6.77 (s, 1H), 6.03 (s, 1H), 5.54 (s, 1H), 4.48 (s, 2H), 3.77 (s, 3H);  $^{13}C$  NMR (100 MHz,  $CDCl_3$ ):  $\delta$  154.6, 154.2, 153.9, 152.6, 133.5, 128.7, 124.7, 122.8, 121.1, 116.0, 115.2, 114.7, 111.0, 103.5, 69.1, 55.7; **HRMS (EI)**  $m/z$  calcd. For  $[M]^+$   $C_{18}H_{16}O_3$  280.1099, found 280.1116.

**1-Chloro-4-(1-((2-phenylallyl)oxy)ethyl)benzene (3n):**

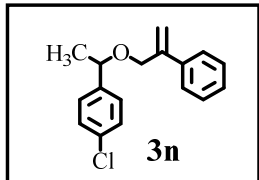

Eluent: n-hexane/ ethyl acetate (98/2); colorless liquid;; Yield: 99 mg (91%);  $^1H$  NMR (400 MHz,  $CDCl_3$ ):  $\delta$  7.41-7.39 (m, 2H), 7.32-7.24 (m, 7H), 5.50 (s, 1H), 5.31 (s, 1H), 4.50 (q,  $J = 6.4$  Hz, 1H), 4.28 (d,  $J = 12$  Hz, 1H), 4.11 (d,  $J = 12$  Hz, 1H), 1.40 (d,  $J = 6.4$  Hz, 3H);  $^{13}C$  NMR (100 MHz,  $CDCl_3$ ):  $\delta$  144.4, 142.1, 138.8, 133.0, 128.5, 128.2, 127.6, 126.0, 114.0, 76.4, 70.2, 23.9; **HRMS (EI)**  $m/z$  calcd. For  $[M]^+$   $C_{17}H_{17}ClO$  272.0967, found 272.0961.

**((2-Phenylallyl)oxy)methylene)dibenzene (3o):**

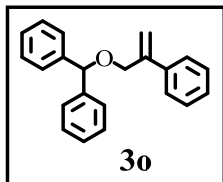

Eluent: n-hexane/ ethyl acetate (95/5); colorless liquid; Yield: 94.8 mg (79%);  $^1H$  NMR (400 MHz,  $CDCl_3$ ):  $\delta$  7.45-7.43 (m, 2H), 7.33-7.26 (m, 11H), 7.24-7.20 (m, 3H), 5.54 (s, 1H), 5.48 (s, 1H), 5.38 (s, 1H), 4.37 (s, 2H);  $^{13}C$  NMR (100 MHz,  $CDCl_3$ ):  $\delta$  144.3, 142.1, 139.0, 128.4, 128.3, 127.7, 127.5, 127.2, 126.2, 114.2, 82.5, 70.5; **HRMS (EI)**  $m/z$  calcd. For  $[M]^+$   $C_{22}H_{20}O$  300.1514, found 300.1507.



**(((2-Phenylallyl)oxy)methanetriyl)tribenzene (3p):**<sup>13</sup>

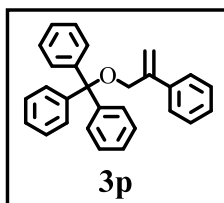

Eluent: n-hexane/ ethyl acetate (90/5); White solid; Yield: 63 mg (42%); M.p.:102 °C; <sup>1</sup>H NMR (400 MHz, CDCl<sub>3</sub>): δ 7.50-7.47 (m, 5H), 7.31-7.20 (m, 15H), 5.66 (s, 1H), 5.53 (s, 1H), 3.96 (s, 2H); <sup>13</sup>C NMR (100 MHz, CDCl<sub>3</sub>): δ 145.0, 144.1, 139.3, 128.6, 128.2, 127.8, 127.5, 127.0, 126.0, 112.5, 87.1, 65.5; **HRMS (EI)** m/z calcd. For [M]<sup>+</sup> C<sub>28</sub>H<sub>24</sub>O 376.1827, found 376.1813.

**2-(((2-Phenylallyl)oxy)methyl)furan (3q):**

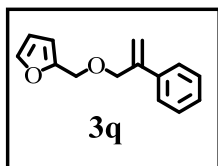

Eluent: n-hexane/ ethyl acetate (94/6); brownish liquid; Yield: 24 mg (28%); <sup>1</sup>H NMR (400 MHz, CDCl<sub>3</sub>): δ 7.46-7.45 (m, 1H), 7.44-7.43 (m, 1H), 7.41-7.40 (m, 1H), 7.34-7.25 (m, 3H), 6.34-6.33 (m, 1H), 6.30 (d, *J* = 4 Hz, 1H), 5.55 (s, 1H), 5.35 (d, *J* = 2 Hz, 1H), 4.50 (s, 2H), 4.39 (s, 2H); <sup>13</sup>C NMR (100 MHz, CDCl<sub>3</sub>): δ 151.7, 143.8, 142.7, 138.6, 128.3, 127.7, 126.0, 114.7, 110.2, 109.3, 71.6, 63.6; **HRMS (EI)** m/z calcd. For [M]<sup>+</sup> C<sub>14</sub>H<sub>14</sub>O<sub>2</sub> 214.0993, found 214.0990.

**N-Methyl-N-(2-phenylallyl)aniline (4a):**

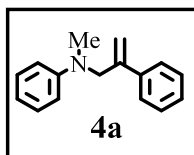

Eluent: n-hexane/ ethyl acetate (97/3); Yellow solid; Yield: 87 mg (98%); M.p.:57 °C; <sup>1</sup>H NMR (400 MHz, CDCl<sub>3</sub>): δ 7.44-7.42 (m, 2H), 7.36-7.27 (m, 3H), 7.23-7.19 (m, 2H), 6.72-6.68 (m, 3H), 5.41 (s, 1H), 5.09 (s, 1H), 4.27 (s, 2H), 3.00 (s, 3H); <sup>13</sup>C NMR (100 MHz, CDCl<sub>3</sub>): δ 149.4, 142.9, 139.7, 129.1, 128.4, 127.8, 126.0, 116.3, 112.4, 112.0, 56.7, 38.3; **HRMS (EI)** m/z calcd. For [M]<sup>+</sup> C<sub>16</sub>H<sub>17</sub>N 223.1361, found 223.1356.

**N-(2-(4-Chlorophenyl)allyl)-N-methylaniline (4b):**

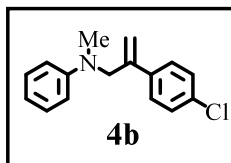

Eluent: n-hexane/ ethyl acetate (96/4); colorless liquid; Yield: 59.6 mg (58%); <sup>1</sup>H NMR (400 MHz, CDCl<sub>3</sub>): δ 7.37-7.29 (m, 4H), 7.24-7.20 (m, 2H), 6.73-6.69 (m, 3H), 5.41 (s, 1H), 5.13 (s, 1H), 4.23 (s, 2H), 2.99 (s, 3H); <sup>13</sup>C NMR (100 MHz, CDCl<sub>3</sub>): δ 149.3, 142.1, 136.0, 133.6, 129.1, 128.5, 127.3, 116.5, 113.2, 112.1, 56.6, 38.2; **HRMS (EI)** m/z calcd. For [M]<sup>+</sup> C<sub>16</sub>H<sub>16</sub>ClN 257.0971, found 257.0966.

**N-Methyl-N-(2-(naphthalen-2-yl)allyl)aniline (4c):**

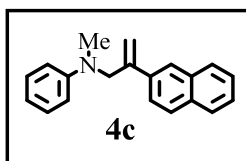

Eluent: n-hexane/ ethyl acetate (95/5); Yellow solid; Yield: 98 mg (90%); M.p.:67 °C; <sup>1</sup>H NMR (400 MHz, CDCl<sub>3</sub>): δ 7.83-7.80 (m, 4H), 7.63-7.60 (m, 1H), 7.49-7.44 (m, 2H), 7.25-7.21 (m, 2H), 6.76-6.69 (m, 3H), 5.57 (s, 1H), 5.21 (s, 1H), 4.40 (s, 2H), 3.05 (s, 3H); <sup>13</sup>C NMR (100 MHz, CDCl<sub>3</sub>): δ 149.4, 142.6, 136.8, 133.3, 132.9, 129.0, 128.1, 127.9, 127.5, 126.2, 125.9, 124.4, 116.3, 112.9, 112.0, 56.7, 38.3; **HRMS (EI)** m/z calcd. For [M]<sup>+</sup> C<sub>20</sub>H<sub>19</sub>N 273.1517, found 273.1506.

#### 4-Isopropyl-*N*-methyl-*N*-(2-phenylallyl)aniline (**4d**):

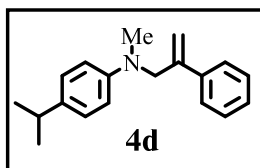

Eluent: n-hexane/ ethyl acetate (97/3); colorless liquid; Yield: 71 mg (67%);  $^1\text{H NMR}$  (400 MHz,  $\text{CDCl}_3$ ):  $\delta$  7.44 (d,  $J = 8$  Hz, 2H), 7.37-7.25 (m, 3H), 7.11-7.07 (m, 2H), 6.68 (d,  $J = 8$  Hz, 2H), 5.43 (s, 1H), 5.15 (s, 1H), 4.24 (s, 2H), 2.98 (s, 3H), 2.85-2.78 (m, 1H), 1.21 (d,  $J = 8$  Hz, 6H);  $^{13}\text{C NMR}$  (100 MHz,  $\text{CDCl}_3$ ):  $\delta$  147.7, 143.2, 139.7, 128.3, 127.7, 126.94, 126.03, 112.60, 112.21, 57.1, 38.3, 33.0, 24.2; **HRMS (ESI)**  $m/z$  calcd. For  $[\text{M}+\text{H}]^+$   $\text{C}_{19}\text{H}_{24}\text{N}$  266.1903, found 266.1913.

#### *N*-(2-(naphthalen-2-yl)allyl)-*N*-phenylnaphthalen-1-amine (**4e**):

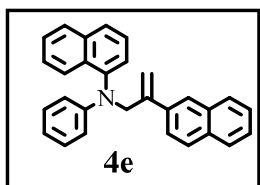

Eluent: n-hexane/ ethyl acetate (90/5); colorless liquid; Yield: 108 mg (70%);  $^1\text{H NMR}$  (400 MHz,  $\text{CDCl}_3$ ):  $\delta$  7.89 (d,  $J = 8$  Hz, 1H), 7.80-7.72 (m, 6H), 7.55-7.53 (m, 1H), 7.48-7.42 (m, 5H), 7.36-7.32 (m, 1H), 7.14-7.10 (m, 2H), 6.72 (t,  $J = 8$  Hz, 1H), 6.62 (d,  $J = 8$  Hz, 2H), 5.66 (s, 2H), 4.89 (s, 2H);  $^{13}\text{C NMR}$  (100 MHz,  $\text{CDCl}_3$ ):  $\delta$  149.3, 143.9, 143.2, 136.8, 135.3, 133.2, 132.9, 131.2, 128.8, 128.5, 128.1, 127.9, 127.5, 127.0, 126.4, 126.3, 126.2, 126.1, 126.0, 125.9, 124.7, 124.6, 123.9, 117.5, 114.0, 113.9, 57.1; **HRMS (EI)**  $m/z$  calcd. For  $[\text{M}]^+$   $\text{C}_{29}\text{H}_{23}\text{N}$  385.1830, found 385.1825.

#### 3-Phenylbut-3-en-1-yl benzoate (**5a**):

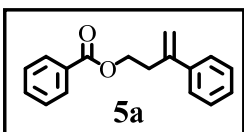

Eluent: n-hexane/ ethyl acetate (90/5); colorless liquid; Yield: 82.6 mg (82%);  $^1\text{H NMR}$  (400 MHz,  $\text{CDCl}_3$ ):  $\delta$  7.97-7.95 (m, 2H), 7.56-7.51 (m, 1H), 7.46-7.39 (m, 4H), 7.36-7.26 (m, 3H), 5.40 (d,  $J = 1$  Hz, 1H), 5.20 (q,  $J = 1$  Hz, 1H), 4.43 (t,  $J = 6.8$  Hz, 2H), 3.00 (m, 2H);  $^{13}\text{C NMR}$  (100 MHz,  $\text{CDCl}_3$ ):  $\delta$  166.5, 144.5, 140.6, 132.8, 130.3, 129.5, 128.4, 128.3, 127.6, 126.1, 114.5, 63.7, 43.6; **HRMS (EI)**  $m/z$  calcd. For  $[\text{M}]^+$   $\text{C}_{17}\text{H}_{16}\text{O}_2$  252.1150, found 252.1145.

#### 3-(Naphthalen-2-yl)but-3-en-1-yl benzoate (**5b**):

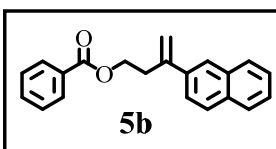

Eluent: n-hexane/ ethyl acetate (90/5); colorless liquid; Yield: 92 mg (76%);  $^1\text{H NMR}$  (400 MHz,  $\text{CDCl}_3$ ):  $\delta$  7.93 (d,  $J = 8$  Hz, 2H), 7.88 (s, 1H), 7.84-7.79 (m, 3H), 7.60 (dd,  $J = 12$  Hz, 4 Hz, 1H), 7.52-7.42 (m, 3H), 7.35 (t,  $J = 8$  Hz, 2H), 5.55 (s, 1H), 5.30 (s, 1H), 4.48 (t,  $J = 8$  Hz, 2H), 3.09 (t,  $J = 8$  Hz, 2H);  $^{13}\text{C NMR}$  (100 MHz,  $\text{CDCl}_3$ ):  $\delta$  166.4, 144.4, 137.8, 133.3, 132.87, 132.81, 130.2, 129.5, 128.23, 128.18, 128.03, 127.5, 126.2, 125.9, 124.7, 124.4, 115.0, 63.8, 34.6; **HRMS (EI)**  $m/z$  calcd. For  $[\text{M}]^+$   $\text{C}_{21}\text{H}_{18}\text{O}_2$  302.1306, found 302.1322.

#### 3-(Benzofuran-2-yl)but-3-en-1-yl benzoate (**5c**):

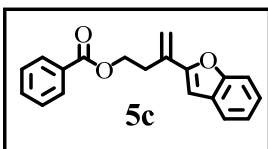

Eluent: n-hexane/ ethyl acetate (90/5); colorless liquid; Yield: 70 mg (60%);  $^1\text{H NMR}$  (400 MHz,  $\text{CDCl}_3$ ):  $\delta$  8.01 (t,  $J = 8$  Hz, 2H), 7.56-7.52 (m, 2H), 7.45-7.39 (m, 3H), 7.29-7.24 (m, 1H), 7.21-7.17 (m, 1H), 6.79 (s, 1H), 5.94 (s, 1H), 5.32 (s, 1H), 4.57 (t,  $J = 8$  Hz, 2H), 2.93 (q,  $J = 8$  Hz, 8 Hz, 2H);  $^{13}\text{C NMR}$  (100 MHz,  $\text{CDCl}_3$ ):  $\delta$  166.5, 155.7, 154.8, 133.5, 132.9,

130.2, 129.6, 128.87, 128.37, 124.7, 122.8, 121.0, 114.8, 111.0, 103.1, 63.7, 32.6; **HRMS (EI)**  $m/z$  calcd. For  $[M]^+$   $C_{19}H_{16}O_3$  292.1099, found 292.1114.

**3-Phenylbut-3-en-1-yl cinnamate (5d):**

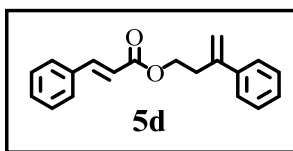

Eluent: n-hexane/ ethyl acetate (90/5); colorless liquid; Yield: 71 mg (64%);  **$^1H$  NMR** (400 MHz,  $CDCl_3$ ):  $\delta$  7.62 (d,  $J = 16$  Hz, 1H), 7.51-7.48 (m, 2H), 7.45-7.42 (m, 2H), 7.38-7.35 (m, 3H), 7.34-7.24 (m, 3H), 6.39 (d,  $J = 16$  Hz, 1H), 5.39 (d,  $J = 4$  Hz, 1H), 5.17 (d,  $J = 1$  Hz, 1H), 4.32 (t,  $J = 8$  Hz, 2H), 2.94 -2.90 (m, 2H);  **$^{13}C$  NMR** (100 MHz,  $CDCl_3$ ):  $\delta$  166.8, 144.72, 144.45, 140.5, 134.4, 130.2, 128.84, 128.40, 128.05, 127.6, 126.0, 118.0, 114.3, 63.3, 34.5; **HRMS (EI)**  $m/z$  calcd. For  $[M]^+$   $C_{19}H_{18}O_2$  278.1306, found 278.1316.

**3-(Naphthalen-2-yl)but-3-en-1-yl cinnamate (5e):**

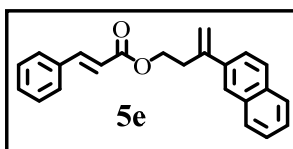

Eluent: n-hexane/ ethyl acetate (90/5); White solid; Yield: 101 mg (77%); M.p.:78 °C;  **$^1H$  NMR** (400 MHz,  $CDCl_3$ ):  $\delta$  7.87 (s, 1H), 7.84-7.79 (m, 3H), 7.61-7.55 (m, 2H), 7.48-7.41 (m, 4H), 7.36-7.33 (m, 3H), 6.37 (d,  $J = 16$  Hz, 1H), 5.55 (s, 1H), 5.28 (s, 1H), 4.40-4.37 (m, 2H), 3.03 (t,  $J = 8$  Hz, 2H);  **$^{13}C$  NMR** (100 MHz,  $CDCl_3$ ):  $\delta$  166.8, 144.7, 144.3, 137.7, 134.3, 133.3, 132.8, 130.2, 128.81, 128.20, 128.03, 127.5, 126.2, 125.9, 124.76, 124.43, 118.0, 114.9, 63.5, 34.5; **HRMS (EI)**  $m/z$  calcd. For  $[M]^+$   $C_{23}H_{20}O_2$  328.1463, found 328.1456.

**3-(Naphthalen-2-yl)but-3-en-1-yl benzenesulfonate (5f):**

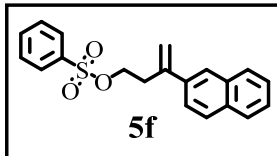

Eluent: n-hexane/ ethyl acetate (90/5); colorless liquid; Yield: 115 mg (85%);  **$^1H$  NMR** (400 MHz,  $CDCl_3$ ):  $\delta$  7.81-7.73 (m, 5H), 6.67 (d,  $J = 1.2$  Hz, 1H), 7.55-7.51 (m, 1H), 7.49-7.39 (m, 5H), 5.48 (s, 1H), 5.18 (d,  $J = 1$  Hz, 1H), 4.17 (t,  $J = 8$  Hz, 2H), 3.00-2.97 (m, 2H);  **$^{13}C$  NMR** (100 MHz,  $CDCl_3$ ):  $\delta$  142.5, 136.8, 135.9, 133.53, 133.19, 132.8, 129.0, 128.10, 128.05, 127.69, 127.46, 126.25, 126.06, 124.66, 124.12, 115.8, 68.8, 34.7; **HRMS (EI)**  $m/z$  calcd. For  $[M]^+$   $C_{20}H_{18}O_3S$  338.0976, found 338.0962.

**(E)-1-Methoxy-4-((2-methylene-4-phenylbut-3-en-1-yl)oxy)benzene (6a):**

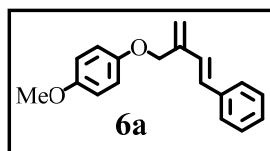

Eluent: n-hexane/ ethyl acetate (90/3); White solid; Yield: 89 mg (84%); M.p.:85 °C;  **$^1H$  NMR** (400 MHz,  $CDCl_3$ ):  $\delta$  7.43-7.41 (m, 2H), 7.33-7.29 (m, 2H), 7.25-7.21 (m, 2H), 6.93-6.89 (m, 2H), 6.87-6.82 (m, 3H), 6.67 (d,  $J = 16$  Hz, 1H), 5.41(s, 1H), 5.36 (s, 1H), 4.75 (s, 2H), 3.76 (s, 3H);  **$^{13}C$  NMR** (100 MHz,  $CDCl_3$ ):  $\delta$  154.0, 152.7, 141.2, 137.0, 129.1, 128.5, 128.1, 127.7, 126.4, 118.1, 115.9, 114.6, 68.9, 55.6; **HRMS (EI)**  $m/z$  calcd. For  $[M]^+$   $C_{18}H_{18}O_2$  266.1298, found 266.1306.

**(E)-1,3-Dimethoxy-5-((2-methylene-4-phenylbut-3-en-1-yl)oxy)benzene (6b):**

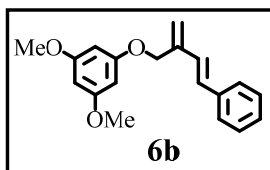

Eluent: n-hexane/ ethyl acetate (97/3); White solid; Yield: 107.7 mg (91%); M.p.:70 °C; <sup>1</sup>H NMR (400 MHz, CDCl<sub>3</sub>): δ 7.43-7.41 (m, 2H), 7.34-7.30 (m, 2H), 7.24-7.21 (m, 1H), 6.85 (d, *J* = 16 Hz, 1H), 6.65 (d, *J* = 16 Hz, 1H), 6.17 (d, *J* = 2 Hz, 2H), 6.11 (t, *J* = 4 Hz, 1H), 5.42 (s, 1H), 5.39 (s, 1H), 4.75 (s, 2H), 3.77 (s, 6H); <sup>13</sup>C NMR (100 MHz, CDCl<sub>3</sub>): δ 161.5, 160.5, 140.9, 137.0, 129.2, 128.6, 128.1, 127.7, 126.5, 118.3, 93.8, 93.2, 96.2, 55.3; **HRMS (EI)** *m/z* calcd. For [M]<sup>+</sup> C<sub>19</sub>H<sub>20</sub>O<sub>3</sub> 296.1412, found 296.1401.

**(E)-(((4-Phenylbuta-1,3-dien-2-yl)oxy)methanetriyl)tribenzene (6c):**

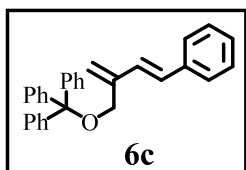

Eluent: n-hexane/ ethyl acetate (97/3); colorless liquid;; Yield: 101.3 mg (63%); <sup>1</sup>H NMR (400 MHz, CDCl<sub>3</sub>): δ 7.52-7.46 (m, 5H), 7.34-7.19 (m, 15H), 6.76 (d, *J* = 16 Hz, 1H), 6.28 (d, *J* = 16 Hz, 1H), 5.62 (d, *J* = 1.6 Hz, 1H), 5.34 (s, 1H), 3.87 (s, 2H); <sup>13</sup>C NMR (100 MHz, CDCl<sub>3</sub>): δ 144.1, 142.9, 137.2, 128.83, 128.70, 128.54, 128.37, 127.87, 127.48, 127.06, 126.3, 116.4, 87.0, 63.7; **HRMS (EI)** *m/z* calcd. For [M]<sup>+</sup> C<sub>30</sub>H<sub>26</sub>O 402.1983, found 402.1977.

**(E)-2-(((2-Methylene-4-phenylbut-3-en-1-yl)oxy)methyl)furan (6d):**

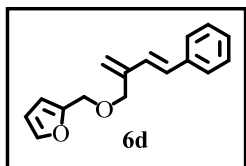

Eluent: n-hexane/ ethyl acetate (97/3); Yellowish liquid; Yield: 87.3 mg (91%); <sup>1</sup>H NMR (400 MHz, CDCl<sub>3</sub>): δ 7.43-7.39 (m, 3H), 7.33-7.29 (m, 2H), 7.25-7.20 (m, 1H), 6.79 (d, *J* = 16 Hz, 1H), 6.67 (d, *J* = 16 Hz, 1H), 6.36-6.34 (m, 2H), 5.32 (s, 2H), 4.50 (s, 2H), 4.29 (s, 2H); <sup>13</sup>C NMR (100 MHz, CDCl<sub>3</sub>): δ 151.8, 142.82, 142.01, 137.2, 129.3, 128.58, 128.37, 127.6, 126.5, 118.2, 110.3, 109.4, 70.0, 63.7; **HRMS (EI)** *m/z* calcd. For [M]<sup>+</sup> C<sub>16</sub>H<sub>16</sub>O<sub>2</sub> 240.1150, found 240.1136.

**(E)-N-Methyl-N-(2-methylene-4-phenylbut-3-en-1-yl)aniline (6e):**

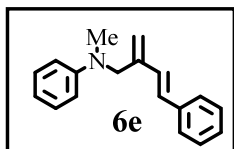

Eluent: n-hexane/ ethyl acetate (97/3); colorless liquid; Yield: 81.6 mg (82%); <sup>1</sup>H NMR (400 MHz, CDCl<sub>3</sub>): δ 7.42-7.40 (m, 2H), 7.34-7.30 (m, 2H), 7.25-7.20 (m, 3H), 6.90 (d, *J* = 16 Hz, 1H), 6.71-6.69 (m, 3H), 5.59 (d, *J* = 16 Hz, 1H), 5.24 (s, 1H), 5.09 (s, 1H), 4.19 (s, 2H), 3.02 (s, 3H); <sup>13</sup>C NMR (100 MHz, CDCl<sub>3</sub>): δ 149.5, 140.4, 137.1, 129.3, 129.1, 128.6, 128.1, 127.6, 126.4, 116.2, 116.2, 111.9, 54.4, 38.3; **HRMS (EI)** *m/z* calcd. For [M]<sup>+</sup> C<sub>18</sub>H<sub>19</sub>N 249.1517, found 249.1520.

**(E)-N-(2-Methylene-4-phenylbut-3-en-1-yl)-N-phenylnaphthalen-1-amine (6f):**

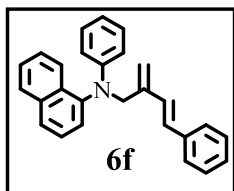

Eluent: n-hexane/ ethyl acetate (97/3); Brown solid; Yield: 131.4 mg (91%); M.p.:142 °C; <sup>1</sup>H NMR (400 MHz, CDCl<sub>3</sub>): δ 7.91 (d, *J* = 8 Hz, 1H), 7.86 (d, *J* = 8 Hz, 1H), 7.80 (dd, *J* = 8 Hz, 4 Hz 1H), 7.52-7.47 (m, 3H), 7.44-7.40 (m, 1H), 7.38-7.36 (m, 3H), 7.31-7.21 (m, 2H), 7.23-7.19 (m, 2H), 7.14-7.09 (m, 2H), 6.89 (d, *J* = 16 Hz, 1H), 6.73-6.69 (m, 1H),

6.58-6.54 (m, 3H), 5.57 (s, 1H), 5.38 (s, 1H), 4.67 (s, 2H);  $^{13}\text{C}$  NMR (100 MHz,  $\text{CDCl}_3$ ):  $\delta$  149.3, 144.0, 140.6, 137.0, 135.3, 131.1, 129.2, 128.7, 128.6, 128.5, 128.0, 127.5, 126.9, 126.36, 126.32, 126.29, 126.25, 126.0, 123.9, 117.4, 117.1, 113.9, 54.7; **HRMS (EI)**  $m/z$  calcd. For  $[\text{M}]^+$   $\text{C}_{27}\text{H}_{23}\text{N}$  361.1830, found 361.1822.

**(E)-3-Methylene-5-phenylpent-4-en-1-yl cinnamate (6g):**

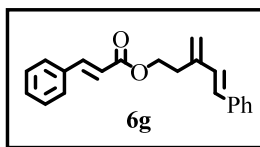

Eluent: n-hexane/ ethyl acetate (97/3); colorless liquid; Yield: 76 mg (63%);  $^1\text{H}$  NMR (400 MHz,  $\text{CDCl}_3$ ):  $\delta$  7.69 (d,  $J = 16$  Hz, 1H), 7.48-7.21 (m, 10H), 6.83 (d,  $J = 16$  Hz, 1H), 6.67 (d,  $J = 16$  Hz, 1H), 6.44 (d,  $J = 16$  Hz, 1H), 5.26 (s, 1H), 5.16 (s, 1H), 4.41 (t,  $J = 8$  Hz, 2H), 2.76 (t,  $J = 8$  Hz, 2H);  $^{13}\text{C}$  NMR (100 MHz,  $\text{CDCl}_3$ ):  $\delta$  166.9, 144.9, 142.1, 137.1, 134.4, 130.47, 130.28, 128.88, 128.71, 128.66, 128.10, 127.6, 126.5, 118.12, 118.05, 63.4, 31.4; **HRMS (EI)**  $m/z$  calcd. For  $[\text{M}]^+$   $\text{C}_{21}\text{H}_{20}\text{O}_2$  304.1463, found 304.1454.

**(E)-3-Methylene-5-phenylpent-4-en-1-yl 3-phenylpropanoate (6h):**

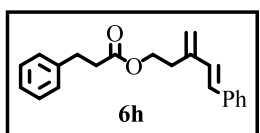

Eluent: n-hexane/ ethyl acetate (97/3); colorless liquid;; Yield: 111.3 mg (91%);  $^1\text{H}$  NMR (400 MHz,  $\text{CDCl}_3$ ):  $\delta$  7.48-7.46 (m, 2H), 7.39-7.22 (m, 8H), 6.85 (d,  $J = 16$  Hz, 1H), 6.66 (d,  $J = 16$  Hz, 1H), 5.26 (s, 1H), 5.13 (s, 1H), 4.32 (t,  $J = 8$  Hz, 2H), 3.0 (t,  $J = 8$  Hz, 2H), 2.71-2.26 (m, 4H);  $^{13}\text{C}$  NMR (100 MHz,  $\text{CDCl}_3$ ):  $\delta$  172.8, 142.0, 140.5, 137.1, 130.4, 128.66, 128.62, 128.51, 128.32, 127.6, 126.53, 126.27, 117.9, 63.2, 35.9, 31.3, 31.0; **HRMS (EI)**  $m/z$  calcd. For  $[\text{M}]^+$   $\text{C}_{21}\text{H}_{22}\text{O}_2$  306.1620, found 306.1607.

**(E)-3-Methylene-5-phenylpent-4-en-1-yl benzenesulfonate (6i):**

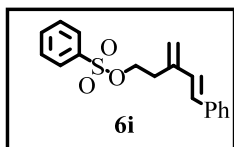

Eluent: n-hexane/ ethyl acetate (97/3); colorless liquid; Yield: 103 mg (82%);  $^1\text{H}$  NMR (400 MHz,  $\text{CDCl}_3$ ):  $\delta$  7.92-7.89 (m, 2H), 7.64-7.60 (m, 1H), 7.54-7.50 (m, 2H), 7.37-7.29 (m, 4H), 7.25-7.21 (m, 1H), 6.68 (d,  $J = 16$  Hz, 1H), 6.45 (d,  $J = 16$  Hz, 1H), 5.19 (s, 1H), 5.05 (s, 1H), 4.23 (t,  $J = 8$  Hz, 2H), 2.73-2.70 (m, 2H);  $^{13}\text{C}$  NMR (100 MHz,  $\text{CDCl}_3$ ):  $\delta$  140.4, 136.80, 136.23, 133.7, 129.78, 129.21, 128.6, 127.89, 127.80, 126.5, 118.7, 69.0, 31.7; **HRMS (EI)**  $m/z$  calcd. For  $[\text{M}]^+$   $\text{C}_{18}\text{H}_{18}\text{O}_3\text{S}$  314.0976, found 314.0968.

**1,3-Bis((2-phenylallyl)oxy)benzene (7a):**

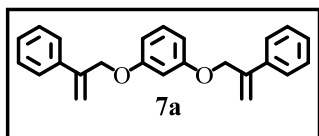

Eluent: n-hexane/ ethyl acetate (98/2); colorless liquid; Yield: 76 mg (56%);  $^1\text{H}$  NMR (400 MHz,  $\text{CDCl}_3$ ):  $\delta$  7.47 (d,  $J = 8$  Hz, 4H), 7.39-7.28 (m, 6H), 7.21-7.17 (m, 1H), 6.59 (d,  $J = 8$  Hz, 3H), 5.60 (s, 2H), 5.46 (s, 2H), 4.86 (s, 4H);  $^{13}\text{C}$  NMR (100 MHz,  $\text{CDCl}_3$ ):  $\delta$  159.8, 143.0, 138.3, 129.8, 128.48, 128.00, 126.05, 114.8, 107.5, 102.4, 69.9; **HRMS (EI)**  $m/z$  calcd. For  $[\text{M}]^+$   $\text{C}_{24}\text{H}_{22}\text{O}_2$  342.1619, found 342.1614.

### 1,3-Bis(((E)-2-methylene-4-phenylbut-3-en-1-yl)oxy)benzene (7b):

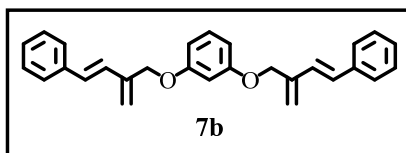

Eluent: n-hexane/ ethyl acetate (98/2); White solid; Yield: 56.7 mg (36%); M.p.:92 °C;  $^1\text{H NMR}$  (400 MHz,  $\text{CDCl}_3$ ):  $\delta$  7.43-7.41 (m, 4H), 7.33-7.29 (m, 4H), 7.25-7.19 (m, 3H), 6.85 (d,  $J$  = 16 Hz, 2H), 6.68-6.60 (m, 5H), 5.44 (s, 2H), 5.39 (s, 2H), 4.79 (s, 4H);  $^{13}\text{C NMR}$  (100 MHz,  $\text{CDCl}_3$ ):  $\delta$  159.9, 141.0, 137.0, 129.9, 129.2, 128.63, 128.15, 127.7, 126.5, 118.2, 107.5, 102.4, 68.2; **HRMS (EI)**  $m/z$  calcd. For  $[\text{M}]^+$   $\text{C}_{28}\text{H}_{26}\text{O}_2$  394.1932, found 394.1928.

### 3-(Naphthalen-2-yl)but-3-en-1-ol (8a):<sup>14</sup>

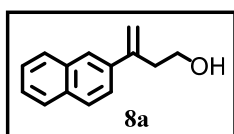

Eluent: n-hexane/ ethyl acetate (90/10); White solid; Yield: 36.4 mg (92%); M.p.:51 °C;  $^1\text{H NMR}$  (400 MHz,  $\text{CDCl}_3$ ):  $\delta$  7.83-7.79 (m, 4H), 7.57 (dd,  $J$  = 4 Hz, 4 Hz, 1H), 7.49-7.43 (m, 2H), 5.55 (d,  $J$  = 1.2 Hz, 1H), 5.26 (d,  $J$  = 1.2 Hz, 1H), 3.77 (t,  $J$  = 8 Hz, 2H), 2.92-2.88 (m, 2H), 1.50 (s, 1H);  $^{13}\text{C NMR}$  (100 MHz,  $\text{CDCl}_3$ ):  $\delta$  144.6, 137.6, 133.3, 132.9, 128.16, 128.03, 127.5, 126.25, 126.0, 124.83, 124.46, 115.0, 61.1, 38.6; **HRMS (ESI)**  $m/z$  calcd. For  $[\text{M}+\text{H}]^+$   $\text{C}_{14}\text{H}_{15}\text{O}$  199.1117, found 199.1125.

### 3-(Benzofuran-2-yl)but-3-en-1-ol (8b):<sup>15</sup>

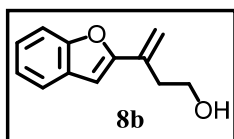

Eluent: n-hexane/ ethyl acetate (90/10); colorless liquid; Yield: 35.7 mg (95%);  $^1\text{H NMR}$  (400 MHz,  $\text{CDCl}_3$ ):  $\delta$  7.52 (d,  $J$  = 4 Hz, 1H), 7.45-7.43 (m, 1H), 7.29-7.25 (m, 1H), 7.21-7.17 (m, 1H), 6.69 (s, 1H), 5.93 (d,  $J$  = 1 Hz, 1H), 5.27 (d,  $J$  = 1 Hz, 1H), 3.37 (q,  $J$  = 1 Hz, 1H), 2.76-2.72 (m, 2H), 1.54 (t,  $J$  = 8 Hz, 1H);  $^{13}\text{C NMR}$  (100 MHz,  $\text{CDCl}_3$ ):  $\delta$  155.7, 154.7, 133.9, 128.7, 124.7, 122.8, 121.0, 114.7, 110.9, 103.0, 61.4, 36.5; **HRMS (EI)**  $m/z$  calcd. For  $[\text{M}]^+$   $\text{C}_{12}\text{H}_{12}\text{O}_2$  188.0837, found 188.0847.

### (E)-3-Methylene-5-phenylpent-4-en-1-ol (8c):<sup>16</sup>

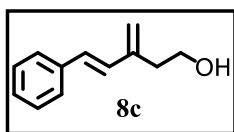

Eluent: n-hexane/ ethyl acetate (90/10); White solid; Yield: 32.3 mg (93%); M.p.:54 °C;  $^1\text{H NMR}$  (400 MHz,  $\text{CDCl}_3$ ):  $\delta$  7.43-7.41 (m, 2H), 7.34-7.30 (m, 2H), 7.25-7.21 (m, 1H), 6.81 (d,  $J$  = 16 Hz, 1H), 6.61 (d,  $J$  = 16 Hz, 1H), 5.26 (s, 1H), 5.14 (s, 1H), 3.82 (t,  $J$  = 8 Hz, 2H), 6.65-6.62 (m, 2H), 1.50 (s, 1H);  $^{13}\text{C NMR}$  (100 MHz,  $\text{CDCl}_3$ ):  $\delta$  142.4, 137.0, 130.3, 128.75, 128.64, 127.6, 126.4, 118.1, 61.2, 35.4; **HRMS (EI)**  $m/z$  calcd. For  $[\text{M}]^+$   $\text{C}_{12}\text{H}_{14}\text{O}$  174.1044, found 174.1025.

### (2-((2-Phenylallyl)oxy)phenyl)methanol (9a):

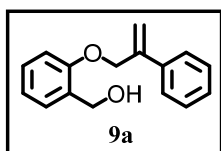

Eluent: n-hexane/ ethyl acetate (93/7); colorless liquid; Yield: 86 mg (90%);  $^1\text{H NMR}$  (400 MHz,  $\text{CDCl}_3$ ):  $\delta$  7.45 (d,  $J$  = 8 Hz, 2H), 7.38-7.25 (m, 5H), 6.96-6.93 (m, 2H), 5.60 (s, 1H), 5.45 (s, 1H), 4.96 (s, 2H), 4.57 (d,  $J$  = 8 Hz, 2H), 2.08 (q,  $J$  = 1.2 Hz, 1);  $^{13}\text{C NMR}$  (100 MHz,  $\text{CDCl}_3$ ):  $\delta$

156.3, 143.1, 138.1, 129.5, 128.89, 128.86, 128.58, 128.17, 126.0, 121.0, 114.9, 111.4, 69.8, 62.0; **HRMS (EI)**  $m/z$  calcd. For  $[M]^+$   $C_{16}H_{16}O_2$  240.1150, found 240.1136.

**2-((2-Phenylallyl)oxy)benzonitrile (9b):**

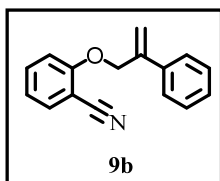

Eluent: n-hexane (94/6); colorless liquid; Yield: 63 mg (67%);  **$^1H$  NMR** (400 MHz,  $CDCl_3$ ):  $\delta$  7.56-7.44 (m, 4H), 7.39-7.30 (m, 3H), 7.02-6.98 (m, 2H), 5.61 (d,  $J = 1$  Hz, 1H), 5.54 (s, 1H), 5.00 (t,  $J = 4$  Hz, 2H);  **$^{13}C$  NMR** (100 MHz,  $CDCl_3$ ):  $\delta$  160.1, 147.7, 137.8, 134.1, 133.7, 128.52, 128.16, 125.9, 121.0, 116.2, 114.8, 112.8, 102.3, 70.1; **HRMS (EI)**  $m/z$  calcd. For  $[M+H]^+$   $C_{16}H_{14}NO$  236.1069, found 236.1072.

**1-((2-Phenylallyl)oxy)-2-vinylbenzene (9c):**

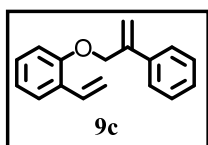

Eluent: n-hexane (100%); colorless liquid; Yield: 78 mg (83%);  **$^1H$  NMR** (400 MHz,  $CDCl_3$ ):  $\delta$  7.50-7.45 (m, 3H), 7.37-7.28 (m, 3H), 7.24-7.20 (m, 1H), 7.05-6.92 (m, 3H), 5.69 (dd,  $J = 8$  Hz, 1.6 Hz, 1H), 5.60 (d,  $J = 1$  Hz, 1H), 5.47 (q,  $J = 4$  Hz, 1H), 5.20 (dd,  $J = 1$  Hz, 4 Hz, 1H), 4.91 (s, 1H);  **$^{13}C$  NMR** (100 MHz,  $CDCl_3$ ):  $\delta$  155.6, 143.1, 138.4, 131.5, 128.69, 128.41, 127.92, 127.20, 126.48, 126.02, 120.9, 114.53, 114.39, 112.4, 70.1; **HRMS (EI)**  $m/z$  calcd. For  $[M]^+$   $C_{17}H_{16}O$  236.1201, found 236.1206.

**(E)-1-(2-Nitrovinyl)-2-((2-phenylallyl)oxy)benzene (9d):**

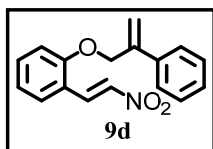

Eluent: n-hexane/ethyl acetate (95/5); colorless liquid; Yield: 86 mg (77%);  **$^1H$  NMR** (400 MHz,  $CDCl_3$ ):  $\delta$  8.01 (d,  $J = 12$  Hz, 1H), 7.62 (d,  $J = 12$  Hz, 1H), 7.46-7.32 (m, 7H), 7.02 (t,  $J = 8$  Hz, 1H), 5.62 (s, 1H), 7.02 (d,  $J = 1$  Hz, 1H), 5.05 (s, 2H);  **$^{13}C$  NMR** (100 MHz,  $CDCl_3$ ):  $\delta$  158.4, 142.7, 138.5, 137.9, 135.1, 133.2, 132.6, 128.71, 128.39, 126.1, 121.4, 119.7, 115.8, 112.8, 70.7; **HRMS (EI)**  $m/z$  calcd. For  $[M]^+$   $C_{17}H_{15}NO_3$  281.1051, found 281.1042.

**But-3-ene-1,3-diylidibenzene (3aa):<sup>17</sup>**

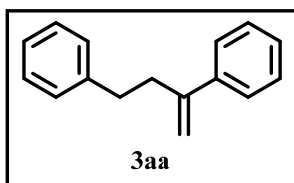

Eluent: n-hexane/ethyl acetate (97/3); colorless liquid; Yield: 60 mg (72%);  **$^1H$  NMR** (400 MHz,  $CDCl_3$ ):  $\delta$  7.44-7.41 (m, 2H), 7.36-7.31 (m, 2H), 7.29-7.23 (m, 3H), 7.20-7.16 (m, 3H), 5.29 (d,  $J = 1.2$  Hz, 1H), 5.06 (d,  $J = 1.2$  Hz, 1H), 2.83-2.74 (m, 4H);  **$^{13}C$  NMR** (100 MHz,  $CDCl_3$ ):  $\delta$  147.8, 141.9, 141.1, 128.4, 128.36, 128.31, 127.4, 126.1, 125.8, 112.6, 37.2, 34.7; **HRMS (EI)**  $m/z$  calcd. For  $[M]^+$   $C_{16}H_{16}$  208.1252, found 208.1238.

**(E)-1-methoxy-4-(3-(4-methoxyphenoxy)-1-phenylprop-1-en-1-yl)benzene (3bb) and (E)-1-methoxy-4-(3-(4-methoxyphenoxy)-2-phenylprop-1-en-1-yl)benzene (3bb')**

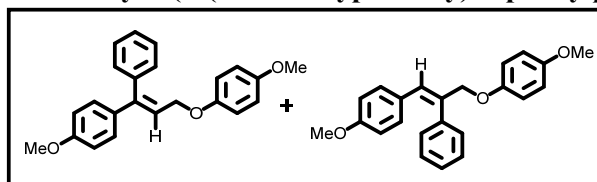

The products **3bb** and **3bb'** were isolated in a 4:1 ratio of inseparable mixture using eluent: *n*-hexane/ethyl acetate (96/4); White solid; Yield: 88 mg (64%); M.p.:85 °C; <sup>1</sup>H NMR (400 MHz, CDCl<sub>3</sub>): δ 7.58 (d, *J* = 4 Hz, 0.51H), 7.35 (t, *J* = 8 Hz, 1H), 7.29-7.23 (m, 5.2H), 7.13 (t, *J* = 8 Hz, 2.3H), 6.90 (d, *J* = 8 Hz, 2.8H), 6.86-6.82 (m, 0.87H), 6.78 (s, 4H), 6.24 (t, *J* = 4 Hz, 1H), 4.88 (s, 0.5H), 4.55 (d, *J* = 4 Hz, 2H), 3.82 (s, 3.0H), 3.79 (s, 0.88H), 3.77 (s, 0.82H), 3.74 (s, 3.0H); <sup>13</sup>C NMR (100 MHz, CDCl<sub>3</sub>): 159.1, 154.0, 153.8, 152.7, 145.1, 142.0, 141.2, 134.7, 132.9, 131.2, 130.9, 130.3, 129.3, 128.4, 128.0, 127.7, 127.6, 127.2, 126.1, 123.7, 115.8, 115.7, 114.6, 114.5, 113.8, 113.6, 66.8, 66.7, 55.6, 55.2. HRMS (MALDI) *m/z* calcd. For [M+H]<sup>+</sup> C<sub>23</sub>H<sub>22</sub>O<sub>3</sub> 347.1642, found 347.1646.

## VII. References-

- 1) a) K. C. M. Kurtz, R. P. Hsung, Y. Zhang, *Org. Lett.* **2006**, *8*, 231–234. b) S. A. I. Sharif, E. D. D. Calder, A. H. Harkiss, M. Maduro, A. Sutherland, *J. Org. Chem.* **2016**, *81*, 9810–9819. c) D. Lasányi, G. L. Tolnai, *Org. Lett.* **2019**, *21*, 10057–10062. d) I. Volchkov, D. Lee, *J. Am. Chem. Soc.* **2013**, *135*, 5324–5327. e) Y-Y. Chen, K-L. Chen, Y-C. Tyan, C-F. Liang, P-C. Lin, *Tetrahedron*, **2015**, *71*, 6210-6218. f) Y-S. Feng, C-Q. Xie, W-L. Qiao, H-J. Xu, *Org. Lett.* **2013**, *15*, 936–939.
- 2) a) N. Iwasaw, S. Watanabe, A. Ario, H. Sogo, *J. Am. Chem. Soc.* **2018**, *140*, 7769–7772. b) V. Druais, M. J. Hall, C. Corsi, S. Wendeborn, C. Meyer, J. Cossy, *Org. Lett.* **2009**, *11*, 935–938. c) B. Rajagopal, C-H. Chou, C-C. Chung, P-C. Lin, *Org. Lett.* **2014**, *16*, 3752–3755. d) B. Martín-Matute, C. Nevado, D. J. Cárdenas, A. M. Echavarren, *J. Am. Chem. Soc.* **2003**, *125*, 5757–5766.
- 3) T. Nanjo, N. Kato, Y. Takemoto, *Org. Lett.* **2018**, *20*, 5766–5769.
- 4) J. Xu, Y-L. Wang, T-J. Gong, B. Xiao, Y. Fu, *Chem. Commun.*, **2014**, *50*, 12915–12918.
- 5) J. Zhong, Y. Long, X. Yan, S. He, R. Ye, H. Xiang, X. Zhou, *Org. Lett.*, **2019**, *21*, 9790–9794.
- 6) D., Ma, S. Hu, S., Chen, J., Pan, S., Tu, Y., Yin, Y., Gao, Y., Zhao, *Org. Lett.* **2020**, *22*, 8156–8160.
- 7) W. J. Kerr, D. M. Lindsay, P. K. Owens, M. Reid, T. Tuttle, S. Campos *ACS Catal.* **2017**, *7*, 7182–7186.
- 8) M. Srinivasan, S. Sankararaman, H. Hopf, I. Dix, P. G. Jones, *J. Org. Chem.* **2001**, *66*, 4299–4303.
- 9) I. Piel, M. Steinmetz, K. Hirano, R. Fröhlich, S. Grimme, F. Glorius, *Angew. Chem. Int. Ed.* **2011**, *50*, 4983–4987.



- 10) A. M. Martí'nez-Gualda, P. Domingo-Legarda, T. Rigotti, S. Di'az-Tendero, A. Fraile, J. Alema'n, *Chem. Commun.*, **2021**, 57, 3046-3049.
- 11) J. Barluenga, F. J. Fan'ana's, R. Sanz, C. Marcos, J. M. Ignacio, *Chem. Commun.*, **2005**, 933-935.
- 12) X-F. Song, T-M. Ding, D. Zhu, J. Huang, Z-M. Chen, *Org. Lett.* **2020**, 22, 7052-7056.
- 13) W. Adam, M. Heil, *Eur JIC*, **1992**, 125, 235-241.
- 14) Q. Huang, A. Fazio, G. Dai, M. A. Campo, R. C. Larock, *J. Am. Chem. Soc.* **2004**, 126, 7460-7461.
- 15) C. Shu, R. S. Mega, B. J. Andreassen, A. Noble, V. K. Aggarwal, *Angew. Chem. Int. Ed.* **2018**, 57, 15430-15434.
- 16) S. M. Tan, A. C. Willis, M. N. Paddon-Row, M. S. Sherburn, *Angew. Chem. Int. Ed.* **2016**, 55, 3081-3085.
- 17) P. Lu, X. Ren, H. Xu, D. Lu, Y. Sun, Z. Lu, *J. Am. Chem. Soc.* **2021**, 143, 12433-12438.

## VIII. Spectra Copies

### <sup>1</sup>H and <sup>13</sup>C NMR spectra of compound **1i**.

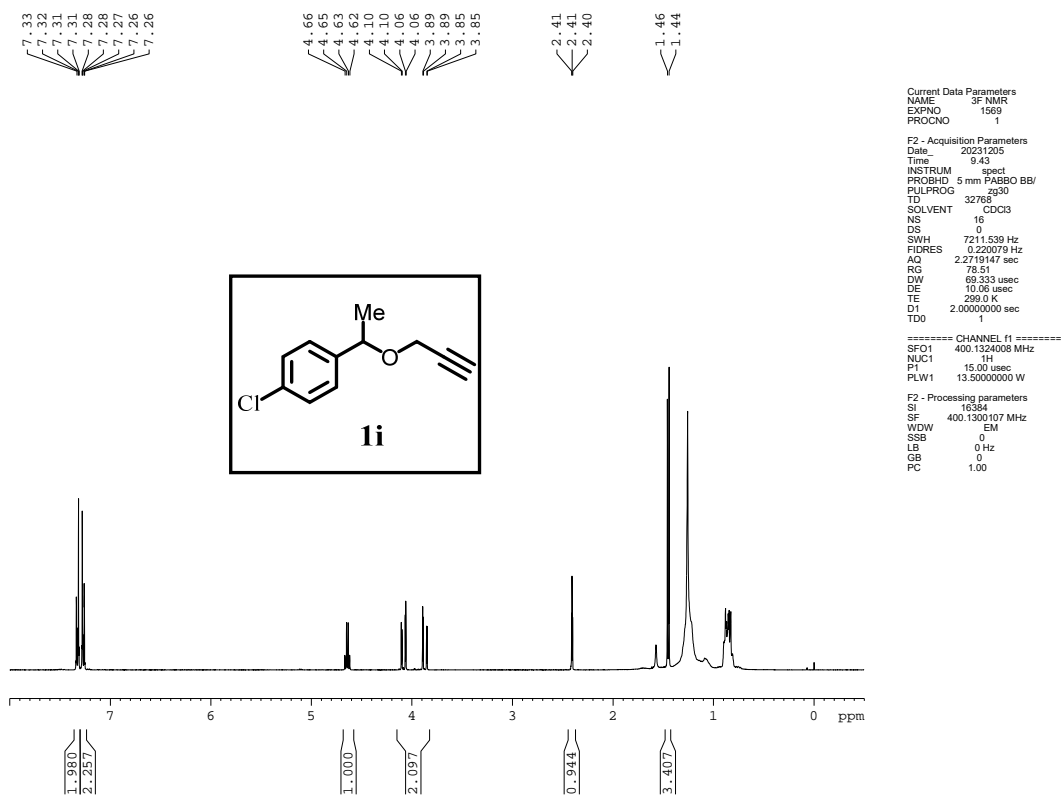

```

Current Data Parameters
NAME      3F NMR
EXPNO    1569
PROCNO   1

F2 - Acquisition Parameters
Date_    20231205
Time     9.43
INSTRUM  spect
PROBHD   5 mm PABBO BB/
PULPROG  zg30
TD        32768
SOLVENT  CDCl3
NS        16
DS        0
SWH       721.539 Hz
FIDRES    0.220079 Hz
AQ        2.2719147 sec
RG        78.51
DW        69.333 usec
DE        10.06 usec
TE        298.0 K
D1        2.0000000 sec
TD0       1

===== CHANNEL f1 =====
SFO1     400.132408 MHz
NUC1     1H
P1       15.00 usec
PLW1     13.5000000 W

F2 - Processing parameters
SI        16384
SF        400.1300107 MHz
WDW       EM
SSB       0
LB        0 Hz
GB        0
PC        1.00
    
```

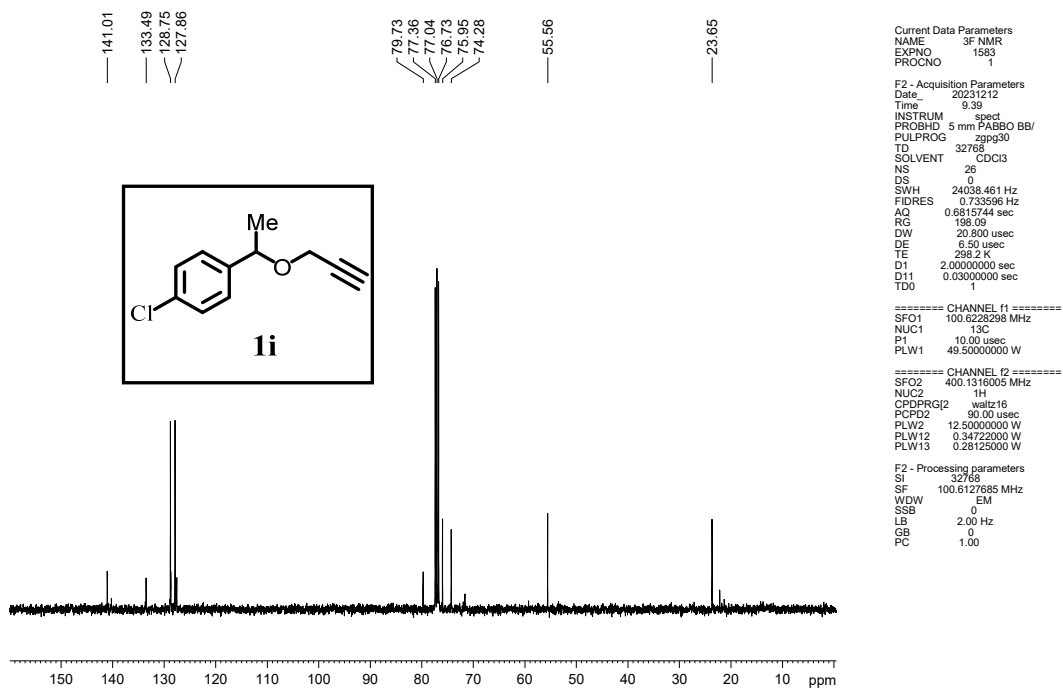

```

Current Data Parameters
NAME      3F NMR
EXPNO    1583
PROCNO   1

F2 - Acquisition Parameters
Date_    20231212
Time     9.39
INSTRUM  spect
PROBHD   5 mm PABBO BB/
PULPROG  zgpg30
TD        32768
SOLVENT  CDCl3
NS        26
DS        0
SWH       24038.461 Hz
FIDRES    0.733596 Hz
AQ        0.6815744 sec
RG        198.09
DW        20.800 usec
DE        6.50 usec
TE        298.2 K
D1        2.0000000 sec
D11      0.0300000 sec
TD0       1

===== CHANNEL f1 =====
SFO1     100.6228298 MHz
NUC1     13C
P1       10.00 usec
PLW1     49.5000000 W

===== CHANNEL f2 =====
SFO2     400.1316003 MHz
NUC2     1H
CPDPRG2  waltz16
PCPD2    90.00 usec
PLW2     12.5000000 W
PLW12    0.3472200 W
PLW13    0.2612500 W

F2 - Processing parameters
SI        32768
SF        100.6127685 MHz
WDW       EM
SSB       0
LB        2.00 Hz
GB        0
PC        1.00
    
```

# <sup>1</sup>H and <sup>13</sup>C NMR spectra of compound 1m.

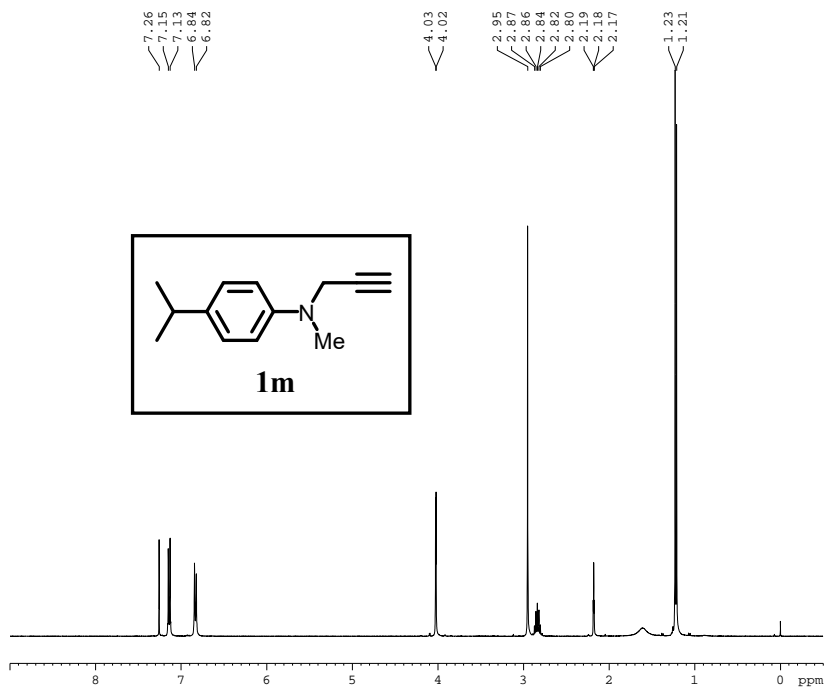

```
Current Data Parameters
NAME      3F NMR
EXPNO    1573
PROCNO   1

F2 - Acquisition Parameters
Date_    20231209
Time     21.06
INSTRUM  spect
PROBHD   5 mm PABBO BB/
PULPROG  zg30
TD        32768
SOLVENT  CDCl3
NS        16
DS        0
SWH      7211.539 Hz
FIDRES   0.220079 Hz
AQ        2.2719147 sec
RG        128.0
DW        69.333 usec
DE        10.06 usec
TE        297.4 K
D1        2.0000000 sec
TD0       1

===== CHANNEL f1 =====
SFO1     400.1324008 MHz
NUC1     1H
P1        15.00 usec
PLW1     13.50000000 W

F2 - Processing parameters
SI        16384
SF        400.1300113 MHz
WDW       EM
SSB       0
LB        0 Hz
GB        0
PC        1.00
```

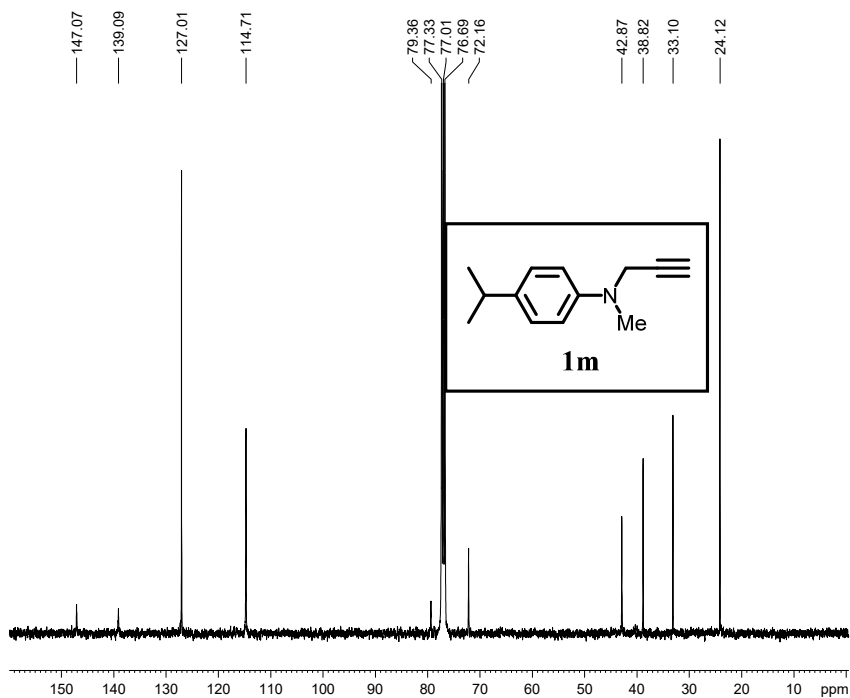

```
Current Data Parameters
NAME      3F NMR
EXPNO    1574
PROCNO   1

F2 - Acquisition Parameters
Date_    20231209
Time     21.11
INSTRUM  spect
PROBHD   5 mm PABBO BB/
PULPROG  zgpg30
TD        32768
SOLVENT  CDCl3
NS        3845
DS        0
SWH      24038.461 Hz
FIDRES   0.733598 Hz
AQ        0.6815744 sec
RG        198.09
DW        20.800 usec
DE        6.50 usec
TE        298.3 K
D1        2.0000000 sec
D11       0.0300000 sec
TD0       1

===== CHANNEL f1 =====
SFO1     100.6228298 MHz
NUC1     13C
P1        10.00 usec
PLW1     49.50000000 W

===== CHANNEL f2 =====
SFO2     400.1316005 MHz
NUC2     1H
CPDPRG2  waltz16
PCPD2    90.00 usec
PLW2     12.50000000 W
PLW12    0.34722000 W
PLW13    0.28125000 W

F2 - Processing parameters
SI        32768
SF        100.6127685 MHz
WDW       EM
SSB       0
LB        2.00 Hz
GB        0
PC        1.00
```

**<sup>1</sup>H and <sup>13</sup>C NMR spectra of compound 1n.**

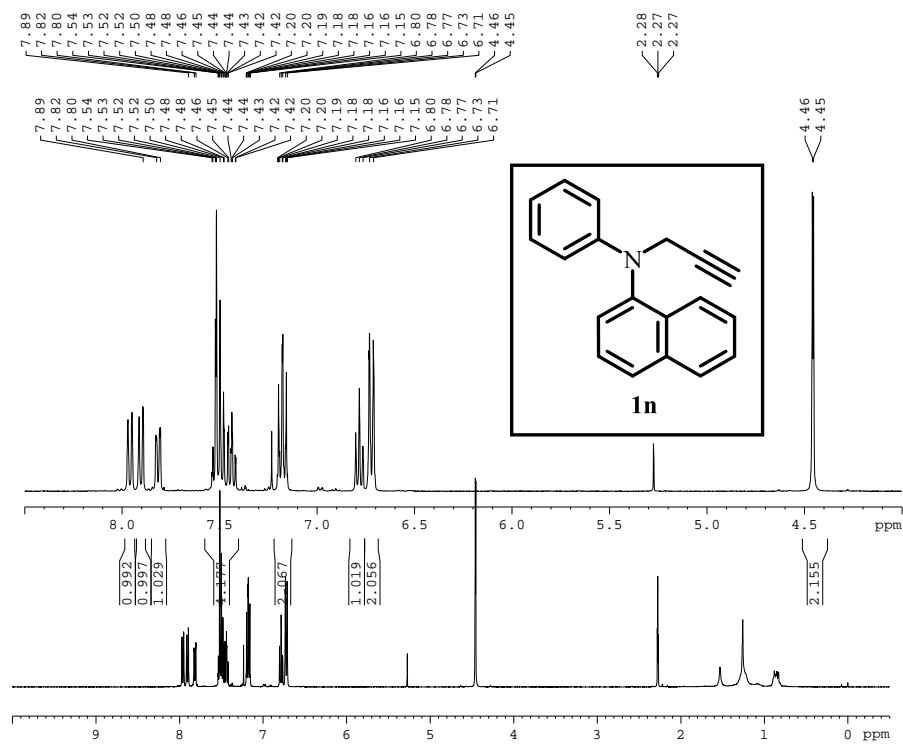

Current Data Parameters  
 NAME SF NMR  
 EXPNO 1328  
 PROCNO 1

F2 - Acquisition Parameters  
 Date\_ 20230818  
 Time 15.29  
 INSTRUM spect  
 PROBHD 5 mm F4BBO BB/  
 PULPROG zg30  
 TD 32768  
 SOLVENT CDCl3  
 NS 16  
 DS 0  
 SWH 7211.530 Hz  
 FIDRES 0.220079 Hz  
 AQ 2.2719147 sec  
 RG 88.08  
 DW 69.333 usec  
 DE 10.06 usec  
 TE 298.7 K  
 D1 2.0000000 sec  
 TD0 1

===== CHANNEL f1 =====  
 SFO1 400.1324038 MHz  
 NUC1 1H  
 P1 15.00 usec  
 PLW1 13.5000000 W

F2 - Processing parameters  
 SI 16384  
 SF 400.1300205 MHz  
 WDW EM  
 SSB 0  
 LB 0 Hz  
 GB 0  
 PC 1.00

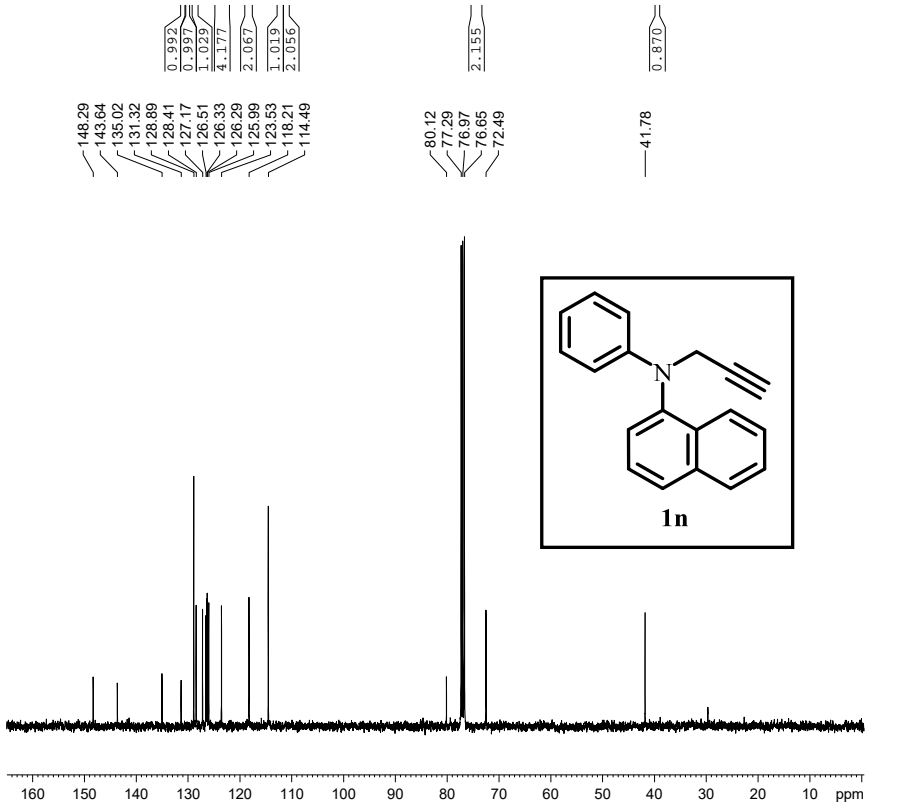

Current Data Parameters  
 NAME SF NMR  
 EXPNO 1329  
 PROCNO 1

F2 - Acquisition Parameters  
 Date\_ 20230818  
 Time 15.31  
 INSTRUM spect  
 PROBHD 5 mm F4BBO BB/  
 PULPROG zgpg30  
 TD 32768  
 SOLVENT CDCl3  
 NS 116  
 DS 0  
 SWH 24038.461 Hz  
 FIDRES 0.733596 Hz  
 AQ 0.6815744 sec  
 RG 192.09  
 DW 20.800 usec  
 DE 6.50 usec  
 TE 298.7 K  
 D1 2.0000000 sec  
 D11 0.0300000 sec  
 TD0 1

===== CHANNEL f1 =====  
 SFO1 100.6228298 MHz  
 NUC1 13C  
 P1 10.00 usec  
 PLW1 49.5000000 W

===== CHANNEL f2 =====  
 SFO2 400.1316005 MHz  
 NUC2 1H  
 CPDPRG2 waltz16  
 PCPD2 90.00 usec  
 PLW2 12.5000000 W  
 PLW12 0.3472200 W  
 PLW13 0.28125000 W

F2 - Processing parameters  
 SI 32768  
 SF 100.6127757 MHz  
 WDW EM  
 SSB 0  
 LB 2.00 Hz  
 GB 0  
 PC 1.00

# <sup>1</sup>H and <sup>13</sup>C NMR spectra of compound 1q.

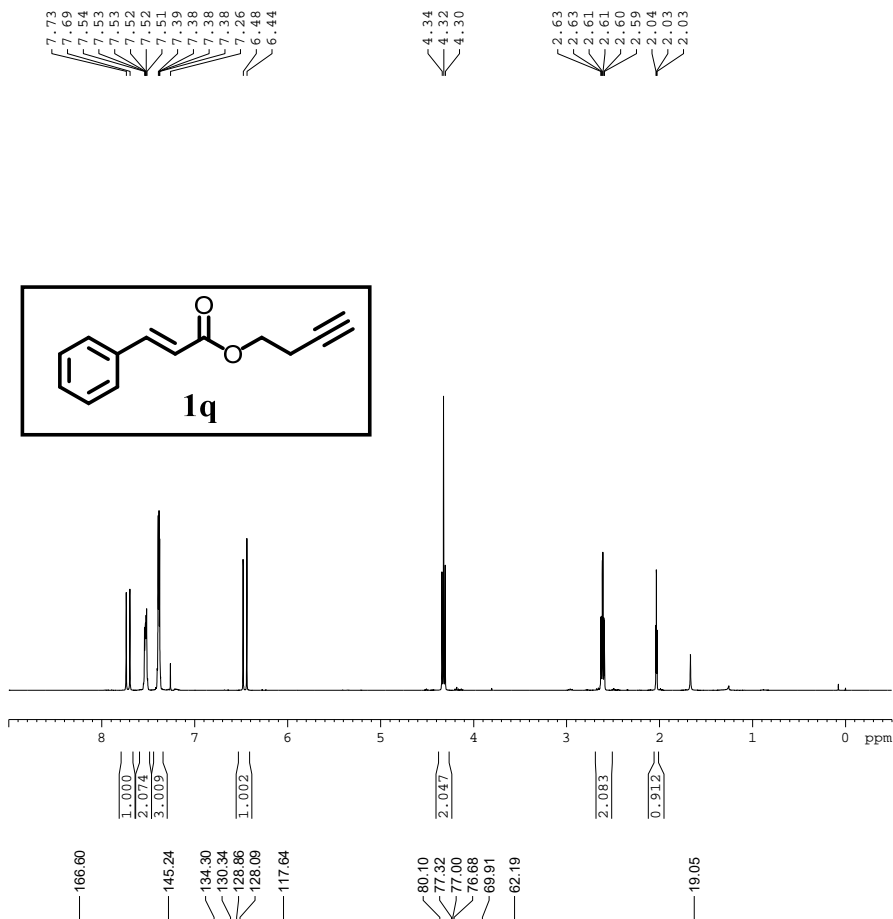

```

Current Data Parameters
NAME      3F NMR
EXPNO    1563
PROCNO   1

F2 - Acquisition Parameters
Date_    20231204
Time     13.16
INSTRUM  spect
PROBHD   5 mm PABBO BB/
PULPROG  zg30
TD       32768
SOLVENT  CDCl3
NS       16
DS       0
SWH      7211.539 Hz
FIDRES   0.220079 Hz
AQ       2.2719147 sec
RG       71.42
DW       69.333 usec
DE       10.06 usec
TE       298.4 K
D1       2.00000000 sec
TD0      1

===== CHANNEL f1 =====
SFO1    400.1324008 MHz
NUC1     1H
P1      15.00 usec
PLW1    13.50000000 W

F2 - Processing parameters
SI      16384
SF      400.1300102 MHz
WDW     EM
SSB     0
LB      0 Hz
GB      0
PC      1.00
    
```

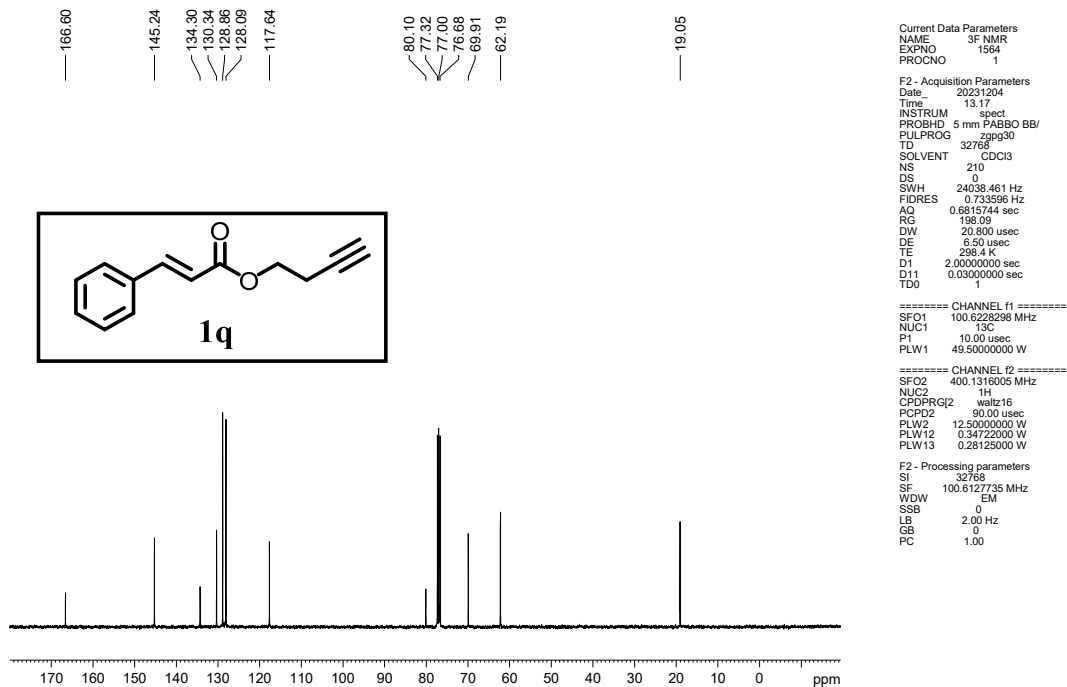

```

Current Data Parameters
NAME      3F NMR
EXPNO    1564
PROCNO   1

F2 - Acquisition Parameters
Date_    20231204
Time     13.17
INSTRUM  spect
PROBHD   5 mm PABBO BB/
PULPROG  zgpg30
TD       32768
SOLVENT  CDCl3
NS       210
DS       0
SWH      24038.461 Hz
FIDRES   0.733956 Hz
AQ       0.6815744 sec
RG       198.00
DW       20.800 usec
DE       6.50 usec
TE       298.4 K
D1       2.00000000 sec
D11     0.03000000 sec
TD0      1

===== CHANNEL f1 =====
SFO1    100.6228288 MHz
NUC1     13C
P1      10.00 usec
PLW1    49.50000000 W

===== CHANNEL f2 =====
SFO2    400.1316005 MHz
NUC2     1H
CPDPRG2  waltz16
PCPD2    90.00 usec
PLW2     12.50000000 W
PLW12    0.34722000 W
PLW13    0.28125000 W

F2 - Processing parameters
SI      32768
SF      100.6127735 MHz
WDW     EM
SSB     0
LB      2.00 Hz
GB      0
PC      1.00
    
```

<sup>1</sup>H and <sup>13</sup>C NMR spectra of compound 1s.

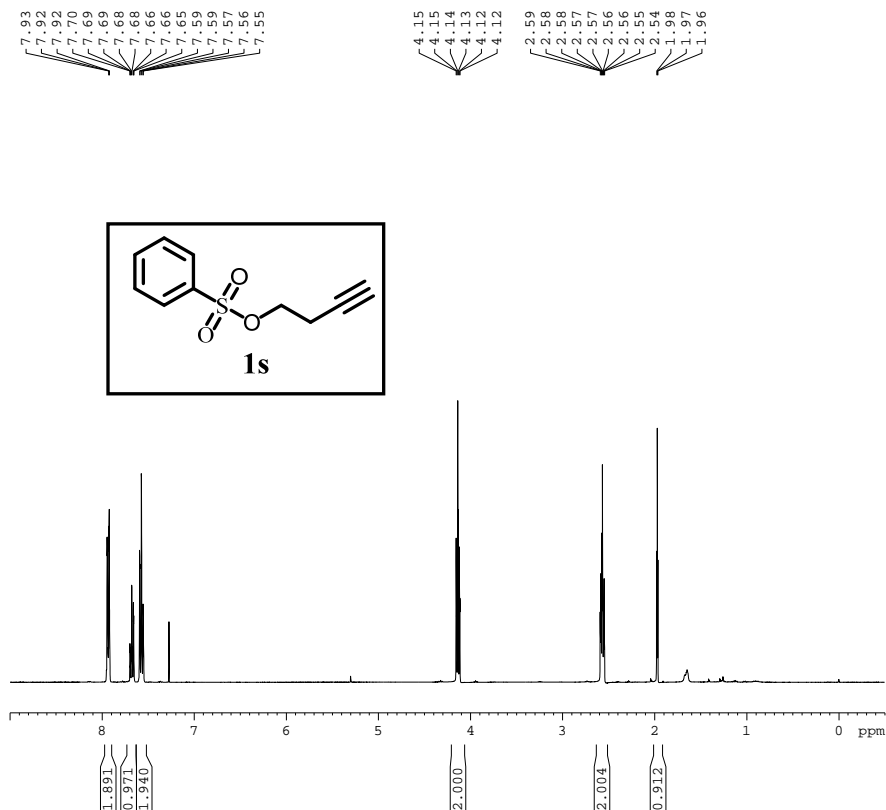

Current Data Parameters  
NAME 3F NMR  
EXPNO 1561  
PROCNO 1

F2 - Acquisition Parameters  
Date\_ 20231204  
Time 13.03  
INSTRUM spect  
PROBHD 5 mm PABBO BB/  
PULPROG zg30  
TD 32768  
SOLVENT CDCl3  
NS 16  
DS 0  
SWH 7211.539 Hz  
FIDRES 0.220079 Hz  
AQ 2.2719147 sec  
RG 71.42  
DW 69.333 usec  
DE 10.00 usec  
TE 298.1 K  
D1 2.0000000 sec  
TD0 1

===== CHANNEL f1 =====  
SFO1 400.132008 MHz  
NUC1 1H  
P1 15.00 usec  
PLW1 13.5000000 W

F2 - Processing parameters  
SI 16384  
SF 400.1300051 MHz  
WDW EM  
SSB 0  
LB 0 Hz  
GB 0  
PC 1.00

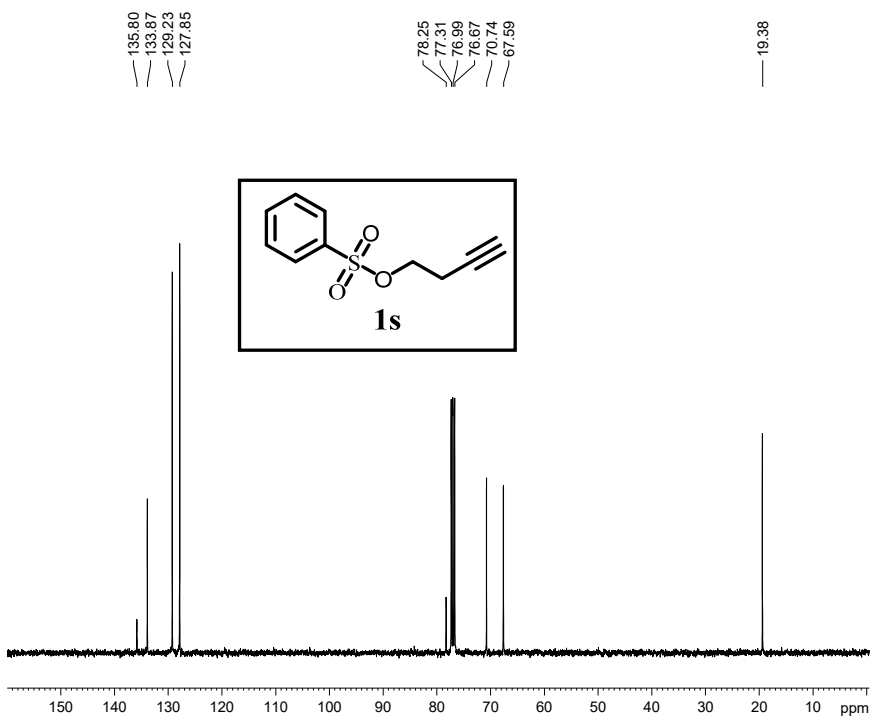

Current Data Parameters  
NAME 3F NMR  
EXPNO 1562  
PROCNO 1

F2 - Acquisition Parameters  
Date 20231204  
Time 13.05  
INSTRUM spect  
PROBHD 5 mm PABBO BB/  
PULPROG zgpg30  
TD 32768  
SOLVENT CDCl3  
NS 133  
DS 0  
SWH 24038.461 Hz  
FIDRES 0.733596 Hz  
AQ 0.6815744 sec  
RG 198.09  
DW 20.800 usec  
DE 6.50 usec  
TE 298.1 K  
D1 2.0000000 sec  
D11 0.0300000 sec  
TD0 1

===== CHANNEL f1 =====  
SFO1 100.6228298 MHz  
NUC1 13C  
P1 10.00 usec  
PLW1 49.5000000 W

===== CHANNEL f2 =====  
SFO2 400.1316005 MHz  
NUC2 1H  
CPDPRG2 waltz16  
PCPD2 90.00 usec  
PLW2 12.5000000 W  
PLW12 0.3472200 W  
PLW13 0.2812500 W

F2 - Processing parameters  
SI 32768  
SF 100.6127768 MHz  
WDW EM  
SSB 0  
LB 2.00 Hz  
GB 0  
PC 1.00

**<sup>1</sup>H and <sup>13</sup>C NMR spectra of compound 3a.**

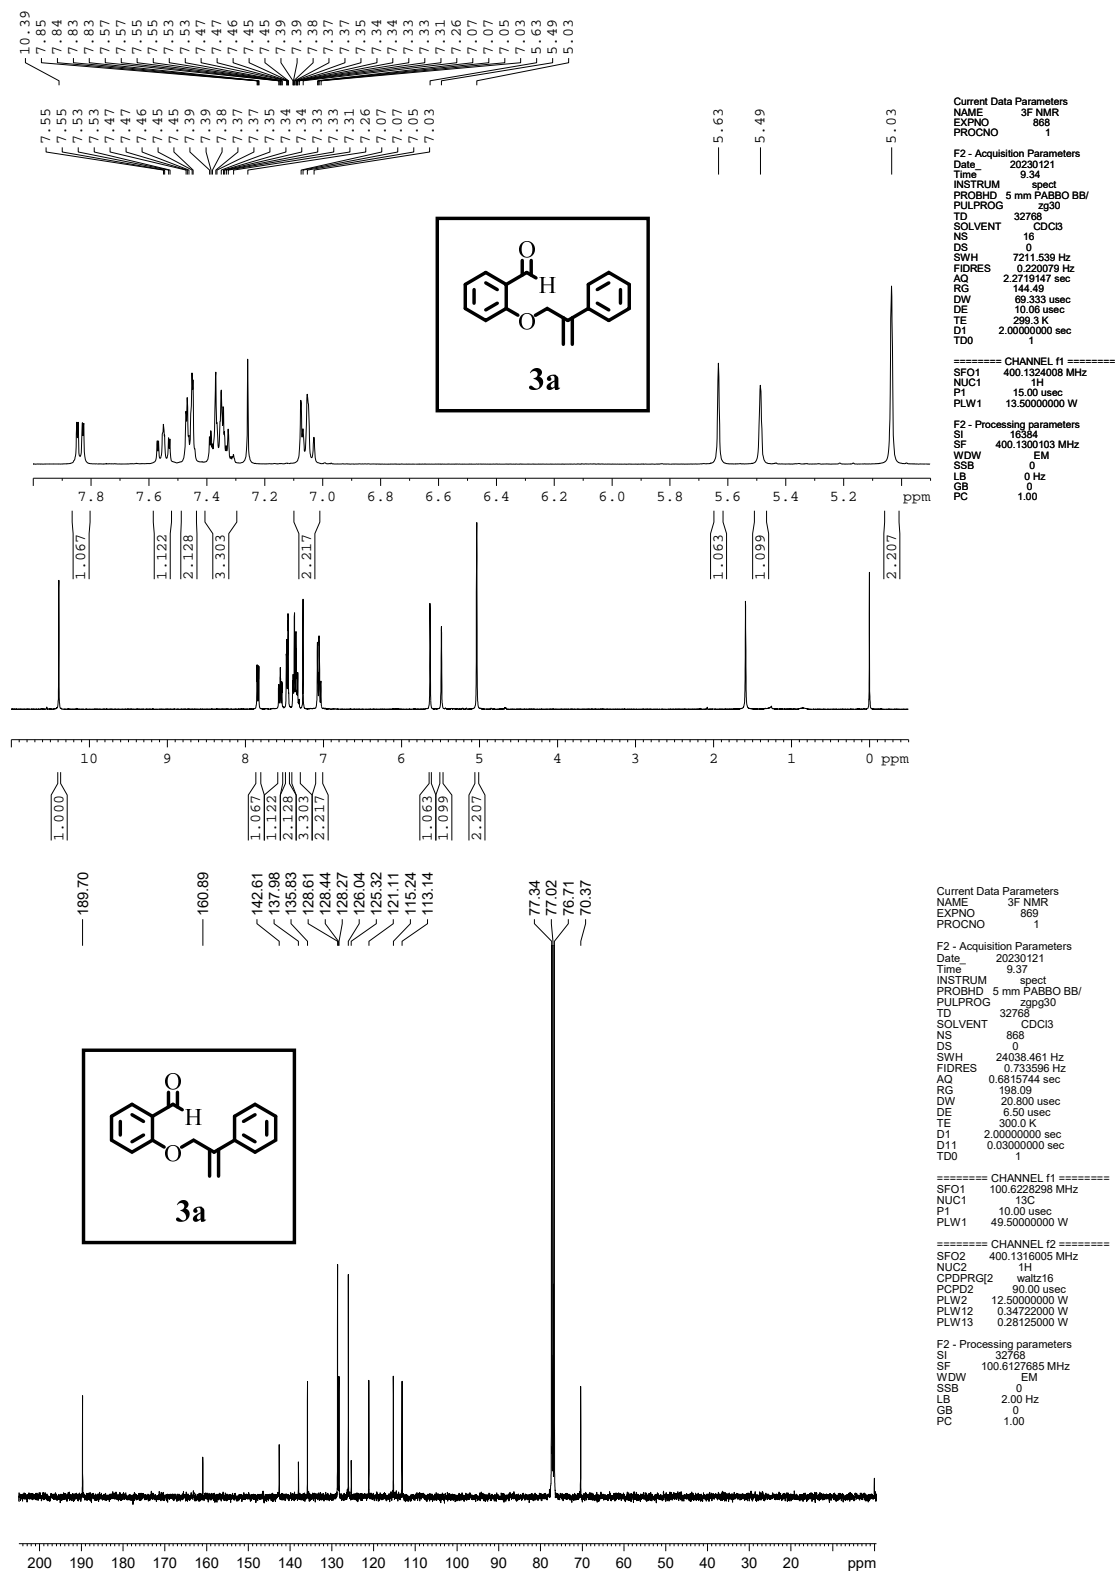

# <sup>1</sup>H and <sup>13</sup>C NMR spectra of compound 3b

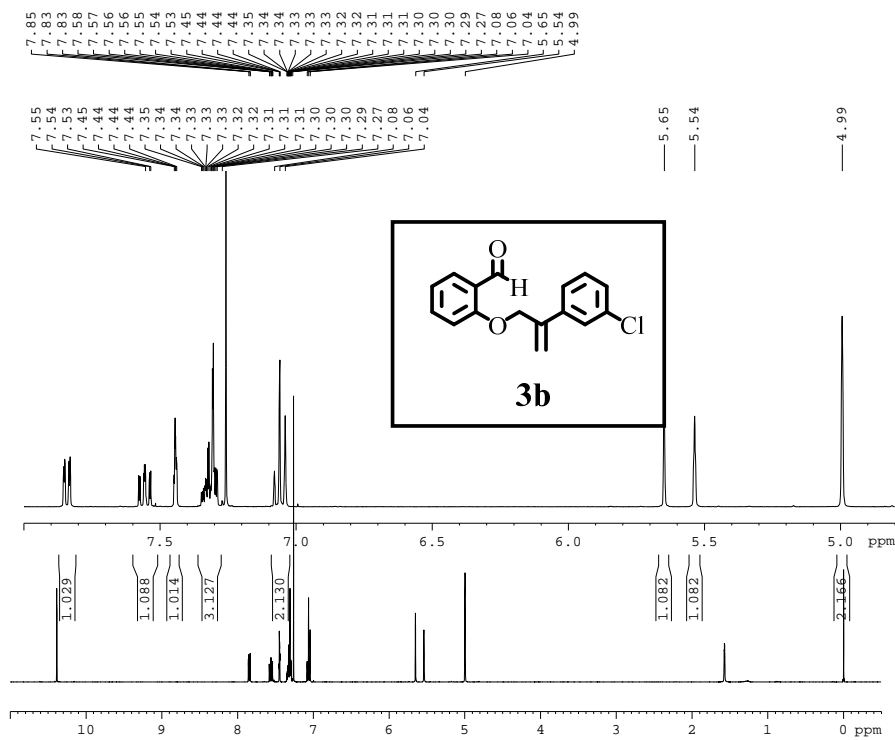

```

Current Data Parameters
NAME      3F NMR
EXPNO    853
PROCNO   1

F2 - Acquisition Parameters
Date_    20230310
Time     18.58
INSTRUM  spect
PROBHD   5 mm PABBO BB/
PULPROG  zg30
TD        32768
SOLVENT  CDCl3
NS        16
DS        0
SWH       7211.539 Hz
FIDRES    0.220079 Hz
AQ        2.2719147 sec
RG        153.74
DW        69.333 usec
DE        10.06 usec
TE        298.9 K
D1        2.0000000 sec
TD0       1

===== CHANNEL f1 =====
SFO1     400.132408 MHz
NUC1     1H
P1       15.00 usec
PLW1    13.5000000 W

F2 - Processing parameters
SI       16384
SF       400.1300107 MHz
WDW      EM
SSB      0
LB       0 Hz
GB       0
PC       1.00
    
```

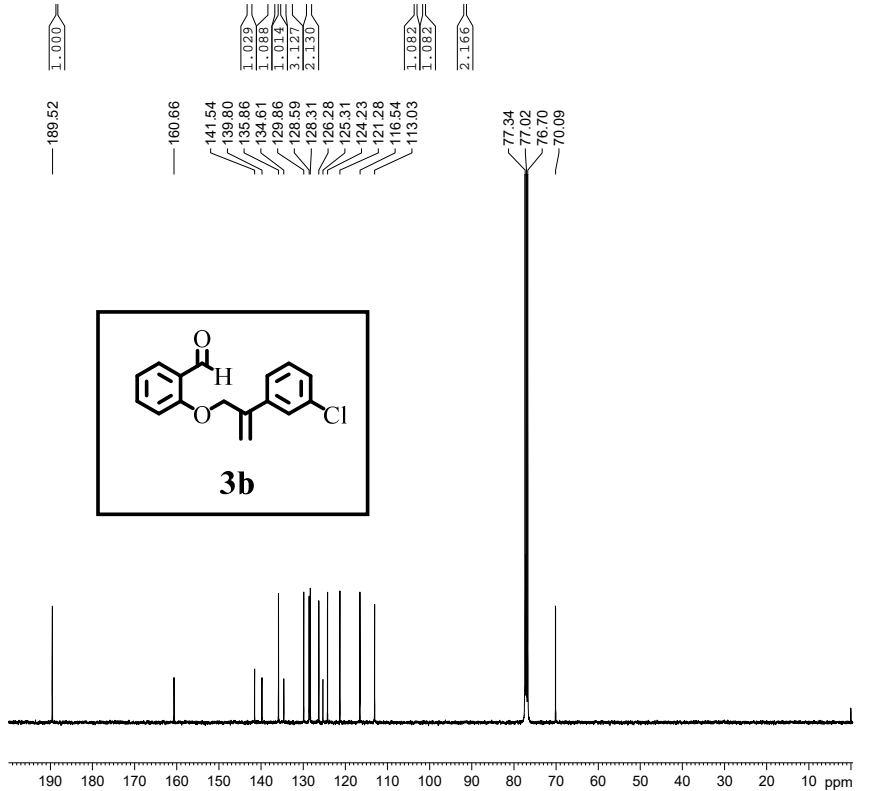

```

Current Data Parameters
NAME      3F NMR
EXPNO    854
PROCNO   1

F2 - Acquisition Parameters
Date_    20230312
Time     21.41
INSTRUM  spect
PROBHD   5 mm PABBO BB/
PULPROG  zgpg30
TD        32768
SOLVENT  CDCl3
NS        5987
DS        0
SWH       24038.461 Hz
FIDRES    0.733596 Hz
AQ        0.6815744 sec
RG        188.09
DW        20.800 usec
DE        6.50 usec
TE        299.3 K
D1        2.0000000 sec
D11      0.03000000 sec
TD0       1

===== CHANNEL f1 =====
SFO1     100.6228298 MHz
NUC1     13C
P1       10.00 usec
PLW1    49.5000000 W

===== CHANNEL f2 =====
SFO2     400.1316005 MHz
NUC2     1H
CPDPRG2  waltz16
PCPD2    90.00 usec
PLW2    12.5000000 W
PLW12   0.34722000 W
PLW13   0.28125000 W

F2 - Processing parameters
SI       32768
SF       100.6127685 MHz
WDW      EM
SSB      0
LB       2.00 Hz
GB       0
PC       1.00
    
```



# <sup>1</sup>H and <sup>13</sup>C NMR spectra of compound 3c

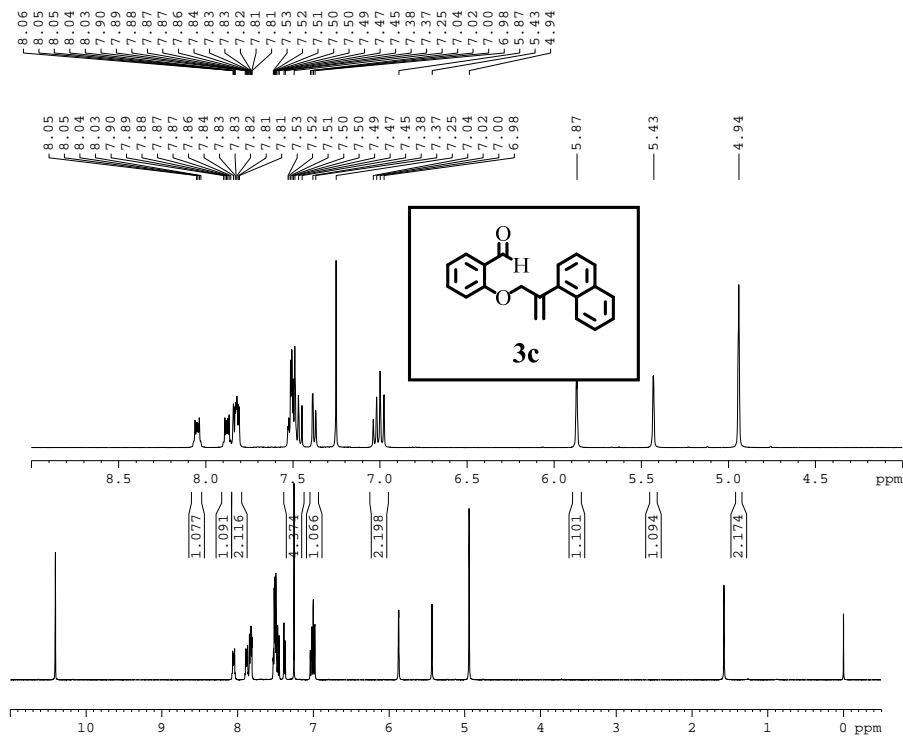

Current Data Parameters  
 NAME 3F NMR  
 EXPNO 969  
 PROCNO 1

F2 - Acquisition Parameters  
 Date\_ 20230316  
 Time 14:37  
 INSTRUM spect  
 PROBHD 5 mm PABBO BB/  
 PULPROG zg30  
 TD 32768  
 SOLVENT CDCl3  
 NS 16  
 DS 0  
 SWH 7211.539 Hz  
 FIDRES 0.220079 Hz  
 AQ 2.2719147 sec  
 RG 128.8  
 DW 69.333 usec  
 DE 10.06 usec  
 TE 299.1 K  
 DT 2.0000000 sec  
 TDO 1

===== CHANNEL f1 =====  
 SFO1 400.1324008 MHz  
 NUC1 1H  
 P1 15.00 usec  
 PLW1 13.5000000 W

F2 - Processing parameters  
 SI 16384  
 SF 400.1300132 MHz  
 WDW EM  
 SSB 0  
 LB 0 Hz  
 GB 0  
 PC 1.00

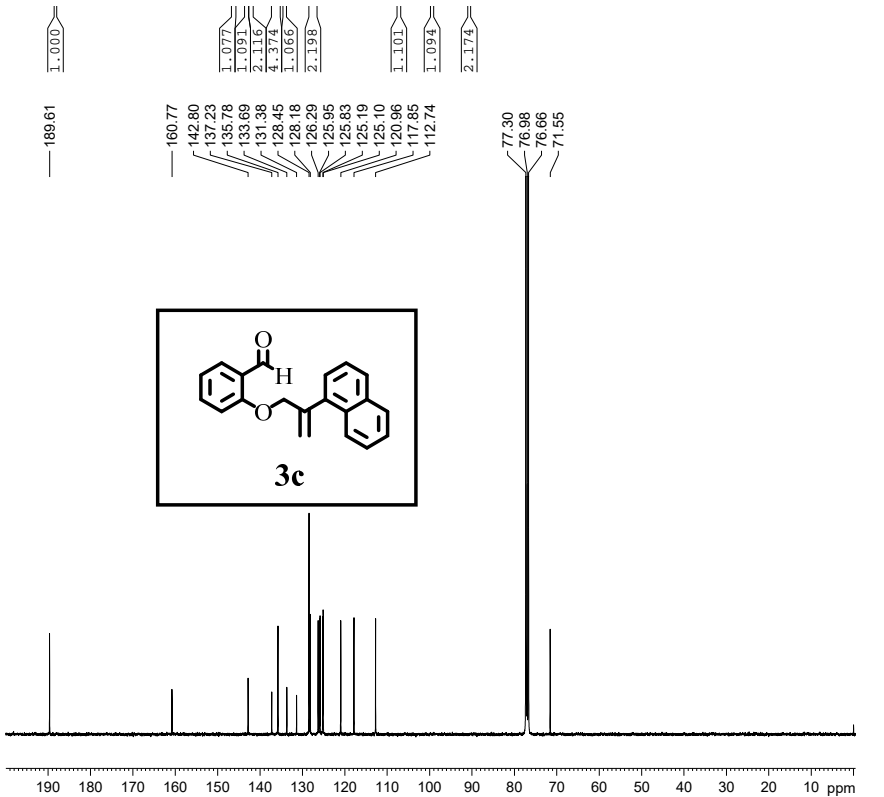

Current Data Parameters  
 NAME 3F NMR  
 EXPNO 979  
 PROCNO 1

F2 - Acquisition Parameters  
 Date\_ 20230319  
 Time 21:57  
 INSTRUM spect  
 PROBHD 5 mm PABBO BB/  
 PULPROG zgpg30  
 TD 32768  
 SOLVENT CDCl3  
 NS 3704  
 DS 0  
 SWH 24038.461 Hz  
 FIDRES 0.733596 Hz  
 AQ 0.6815744 sec  
 RG 198.09  
 DW 20.800 usec  
 DE 6.50 usec  
 TE 299.4 K  
 DT 2.0000000 sec  
 D11 0.0300000 sec  
 TDO 1

===== CHANNEL f1 =====  
 SFO1 100.6228298 MHz  
 NUC1 13C  
 P1 10.00 usec  
 PLW1 49.5000000 W

===== CHANNEL f2 =====  
 SFO2 400.1316005 MHz  
 NUC2 1H  
 CPDPRG2 waltz16  
 PCPD2 90.00 usec  
 PLW2 12.5000000 W  
 PLW12 0.3472000 W  
 PLW13 0.29125000 W

F2 - Processing parameters  
 SI 32768  
 SF 100.6127733 MHz  
 WDW EM  
 SSB 0  
 LB 2.00 Hz  
 GB 0  
 PC 1.00

# <sup>1</sup>H and <sup>13</sup>C NMR spectra of compound 3d

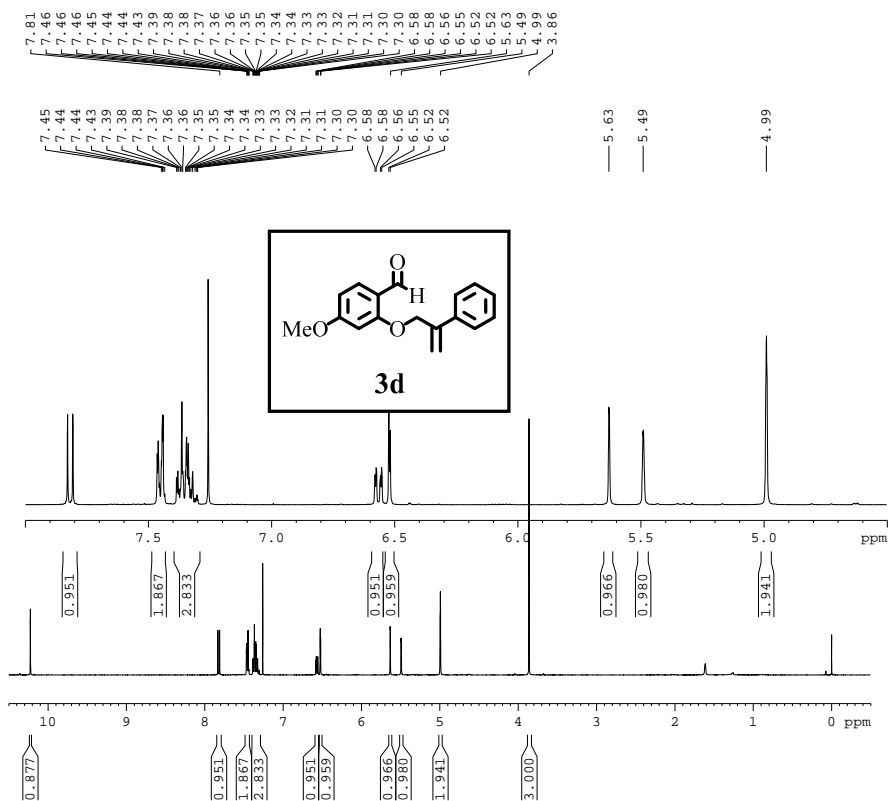

```

Current Data Parameters
NAME      3F NMR
EXPNO    863
PROCNO   1

F2 - Acquisition Parameters
Date_    20230314
Time     18.48
INSTRUM  spect
PROBHD   5 mm PABBO BB/
PULPROG  zg30
TD       32768
SOLVENT  CDCl3
NS       16
DS       0
SWH      7211.539 Hz
FIDRES   0.220079 Hz
AQ       2.2719147 sec
RG       113.31
DW       68.333 usec
DE       10.98 usec
TE       299.2 K
D1       2.0000000 sec
D11      1
D10      2.0000000 sec

===== CHANNEL f1 =====
SFO1    400.1324008 MHz
NUC1    1H
P1      15.00 usec
PLW1    13.5000000 W

F2 - Processing parameters
SI      16384
SF      400.130106 MHz
WDW     EM
SSB     0 Hz
GB      0
PC      1.00
    
```

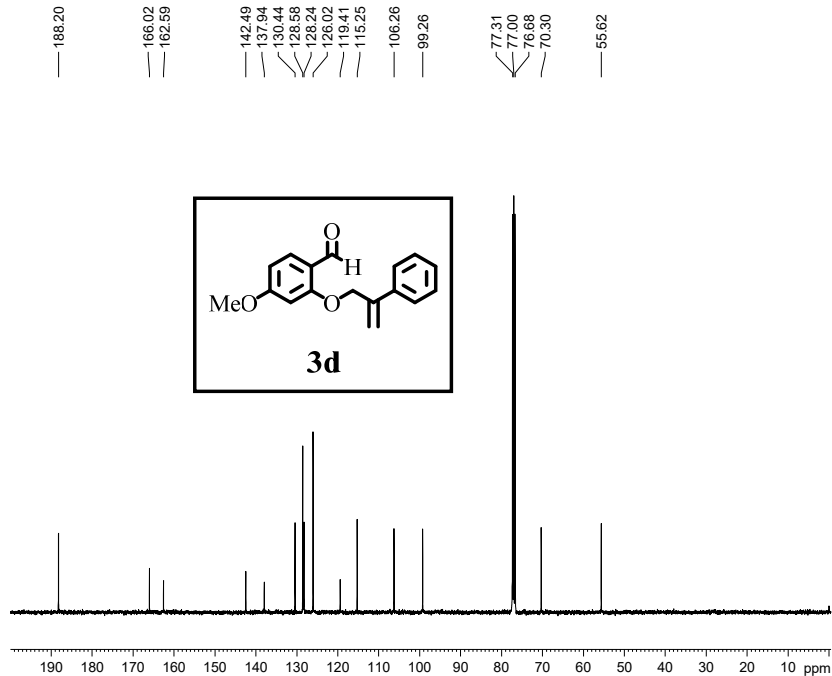

```

Current Data Parameters
NAME      3F NMR
EXPNO    964
PROCNO   1

F2 - Acquisition Parameters
Date_    20230314
Time     18.50
INSTRUM  spect
PROBHD   5 mm PABBO BB/
PULPROG  zgpg30
TD       32768
SOLVENT  CDCl3
NS       850
DS       0
SWH      24038.461 Hz
FIDRES   0.733596 Hz
AQ       0.6615744 sec
RG       198.09
DW       20.800 usec
DE       6.50 usec
TE       299.7 K
D1       2.0000000 sec
D11      0.0300000 sec
D10      2.0000000 sec

===== CHANNEL f1 =====
SFO1    100.6228298 MHz
NUC1    13C
P1      10.00 usec
PLW1    49.5000000 W

===== CHANNEL f2 =====
SFO2    400.1316005 MHz
NUC2    1H
CPCPRG2  waltz16
PCPD2    90.00 usec
PLW2    12.5000000 W
PLW12   0.3472000 W
PLW13   0.28125000 W

F2 - Processing parameters
SI      32768
SF      100.6127717 MHz
WDW     EM
SSB     0 Hz
GB      0
PC      1.00
    
```

# <sup>1</sup>H and <sup>13</sup>C NMR spectra of compound 3e.

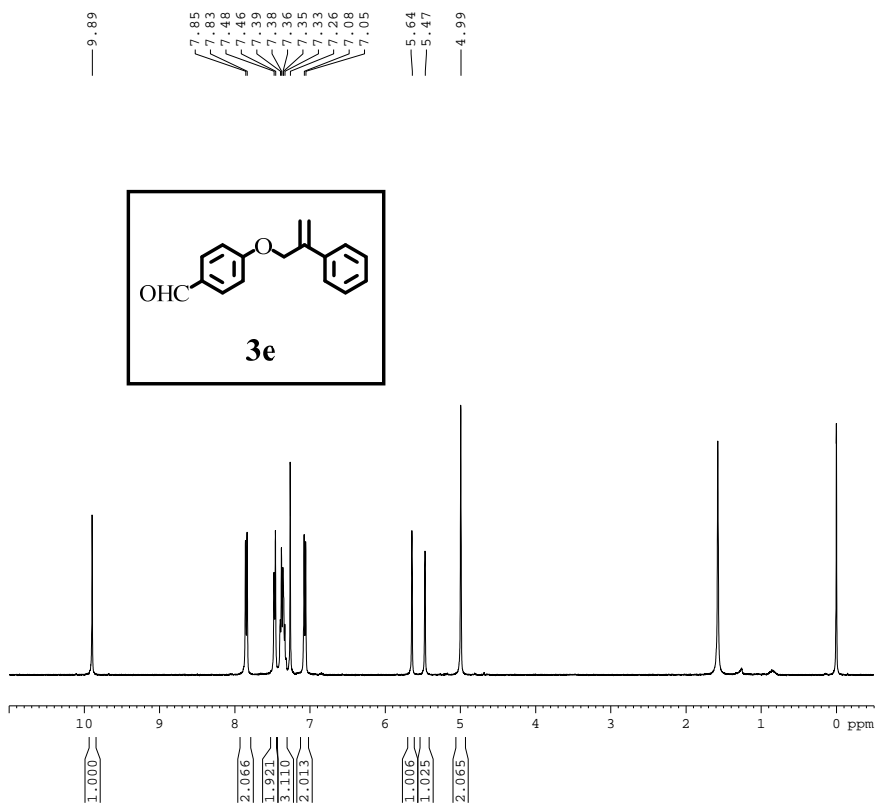

```

Current Data Parameters
NAME      3F NMR
EXPNO    874
PROCNO   1

F2 - Acquisition Parameters
Date_    20230124
Time     7.57
INSTRUM  spect
PROBHD   5 mm PABBO BB/
PULPROG  zg30
TD        32768
SOLVENT  CDCl3
NS        16
DS        0
SWH       7211.539 Hz
FIDRES   0.220079 Hz
AQ        2.2719147 sec
RG        198.09
DW        69.333 usec
DE        10.06 usec
TE        298.1 K
D1        2.0000000 sec
D10       1
TD0       1

===== CHANNEL f1 =====
SFO1     400.1324008 MHz
NUC1      1H
P1        15.00 usec
PLW1     13.50000000 W

F2 - Processing parameters
SI        16384
SF        400.1300102 MHz
WDW       EM
SSB       0
LB        0 Hz
GB        0
PC        1.00
    
```

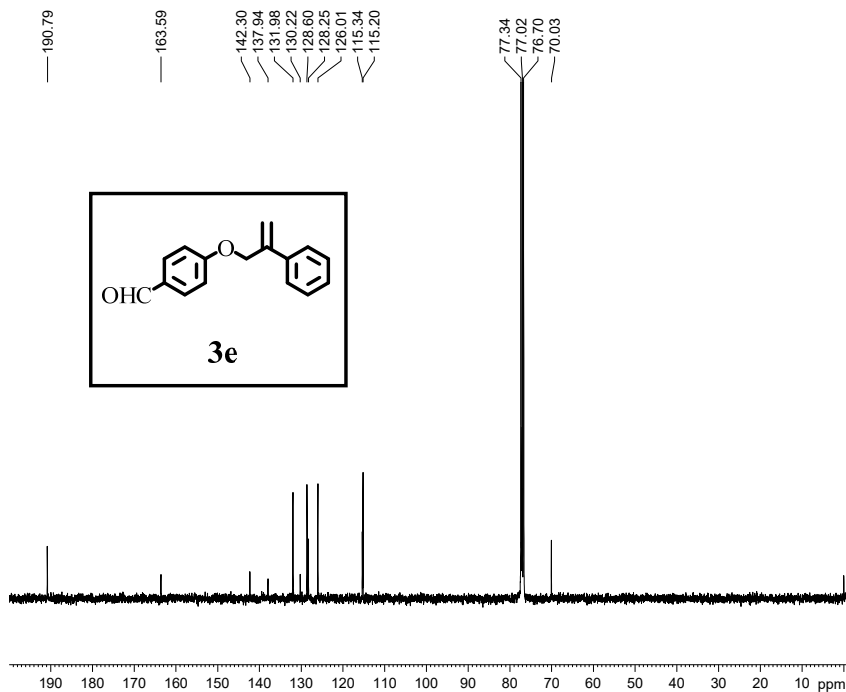

```

Current Data Parameters
NAME      3F NMR
EXPNO    875
PROCNO   1

F2 - Acquisition Parameters
Date_    20230124
Time     8.01
INSTRUM  spect
PROBHD   5 mm PABBO BB/
PULPROG  zpg30
TD        32768
SOLVENT  CDCl3
NS        802
DS        0
SWH       24038.461 Hz
FIDRES   0.733596 Hz
AQ        0.6815744 sec
RG        198.09
DW        20.800 usec
DE        6.50 usec
TE        299.6 K
D1        2.0000000 sec
D11       0.03000000 sec
TD0       1

===== CHANNEL f1 =====
SFO1     100.6226298 MHz
NUC1      13C
P1        10.00 usec
PLW1     49.50000000 W

===== CHANNEL f2 =====
SFO2     400.1316005 MHz
NUC2      1H
CPDPRG2  waltz16
PCPD2    90.00 usec
PLW2     12.50000000 W
PLW12    0.34722000 W
PLW13    0.28125000 W

F2 - Processing parameters
SI        32768
SF        100.6121685 MHz
WDW       EM
SSB       0
LB        2.00 Hz
GB        0
PC        1.00
    
```

# <sup>1</sup>H and <sup>13</sup>C NMR spectra of compound 3f.

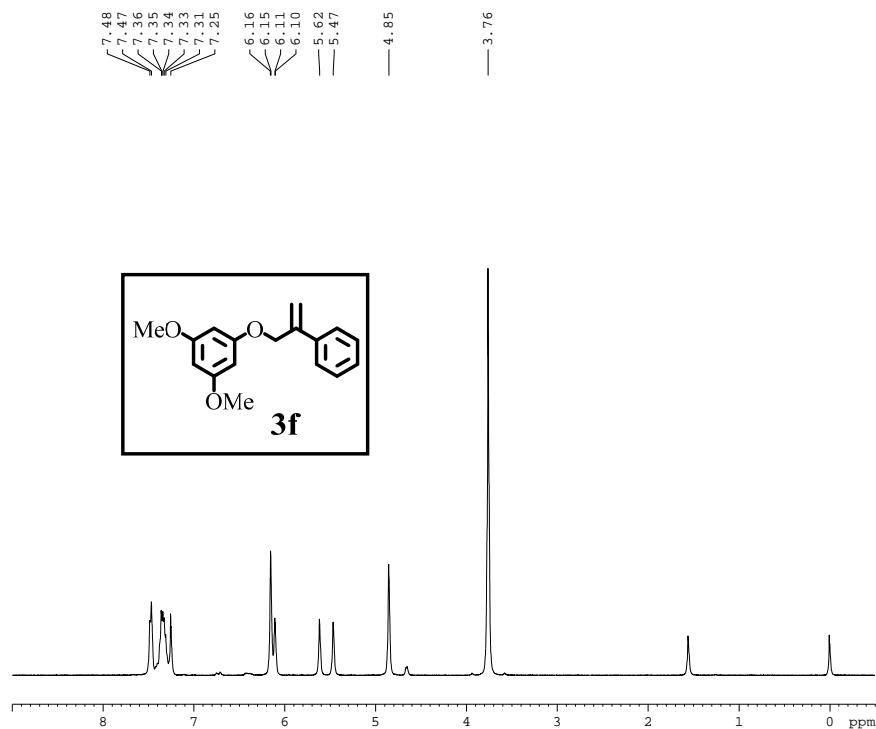

Current Data Parameters  
 NAME 3f NMR  
 EXPNO 1045  
 PROCNO 1

F2 - Acquisition Parameters  
 Date\_ 20230421  
 Time 3.14  
 INSTRUM spect  
 PROBHD 5 mm PABBO BB/  
 PULPROG zg30  
 TD 32768  
 SOLVENT CDCl3  
 NS 16  
 DS 0  
 SWH 7211.539 Hz  
 FIDRES 0.220079 Hz  
 AQ 2.2719147 sec  
 RG 113.31  
 DW 69.333 usec  
 DE 10.36 usec  
 TE 298.2 K  
 D1 2.0000000 sec  
 TDO 1

===== CHANNEL f1 =====  
 SFO1 400.1324008 MHz  
 NUC1 1H  
 P1 15.00 usec  
 PLW1 13.5000000 W  
 F2 - Processing parameters  
 SI 16384  
 SF 400.1300136 MHz  
 WDW EM  
 SSB 0  
 LB 0 Hz  
 GB 0  
 PC 1.00

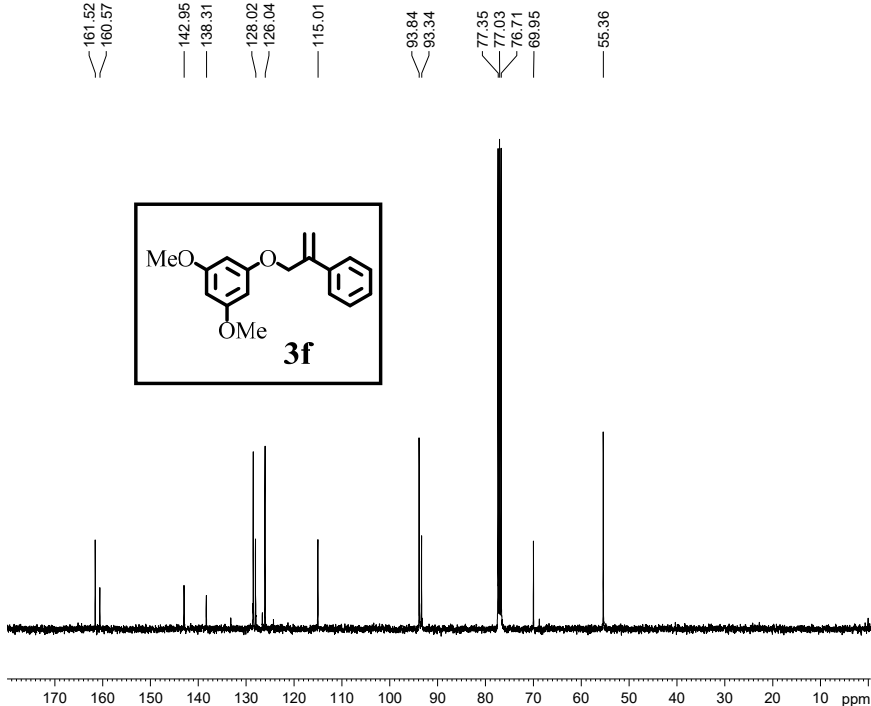

Current Data Parameters  
 NAME 3f NMR  
 EXPNO 1046  
 PROCNO 1

F2 - Acquisition Parameters  
 Date\_ 20230421  
 Time 3.17  
 INSTRUM spect  
 PROBHD 5 mm PABBO BB/  
 PULPROG zgpg30  
 TD 32768  
 SOLVENT CDCl3  
 NS 575  
 DS 0  
 SWH 24038.461 Hz  
 FIDRES 0.733596 Hz  
 AQ 0.6815744 sec  
 RG 198.09  
 DW 20.800 usec  
 DE 6.50 usec  
 TE 298.2 K  
 D1 2.0000000 sec  
 D11 0.03000000 sec  
 TDO 1

===== CHANNEL f1 =====  
 SFO1 100.6226298 MHz  
 NUC1 13C  
 P1 10.00 usec  
 PLW1 49.5000000 W  
 ===== CHANNEL f2 =====  
 SFO2 400.1316005 MHz  
 NUC2 1H  
 CPDPRG2 waltz16  
 PCPD2 90.00 usec  
 PLW2 12.5000000 W  
 PLW12 0.34722000 W  
 PLW13 0.28125000 W  
 F2 - Processing parameters  
 SI 32768  
 SF 100.6127685 MHz  
 WDW EM  
 SSB 0  
 LB 2.00 Hz  
 GB 0  
 PC 1.00

# <sup>1</sup>H and <sup>13</sup>C NMR spectra of compound 3g.

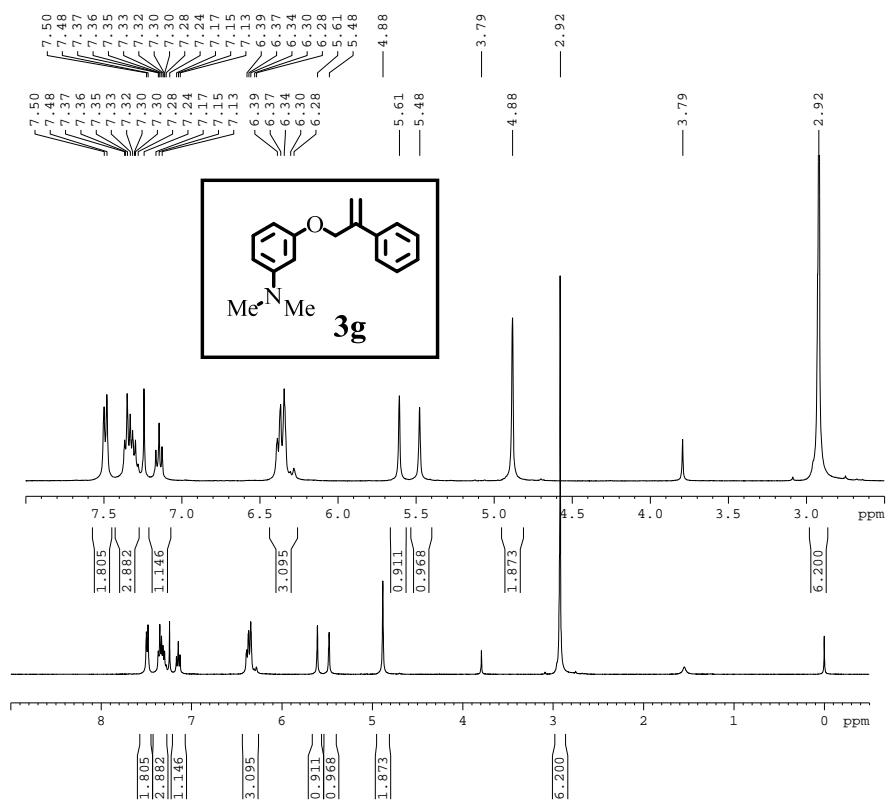

Current Data Parameters  
 NAME 3F NMR  
 EXPNO 1014  
 PROCNO 1

F2 - Acquisition Parameters  
 Date\_ 20230331  
 Time 0.33  
 INSTRUM spect  
 PROBHD 5 mm PABBO BB/  
 PULPROG zg30  
 TD 32768  
 SOLVENT CDCl3  
 NS 16  
 DS 0  
 SWH 7211.539 Hz  
 FIDRES 0.220079 Hz  
 AQ 2.2719147 sec  
 RG 99.72  
 DW 69.33 usec  
 DE 10.06 usec  
 TE 299.7 K  
 D1 2.00000000 sec  
 TDO

==== CHANNEL f1 =====  
 SFO1 400.1324008 MHz  
 NUC1 1H  
 P1 15.00 usec  
 PLW1 13.50000000 W

F2 - Processing parameters  
 SI 16384  
 SF 400.1300171 MHz  
 WDW EM  
 SSB 0  
 LB 0 Hz  
 GB 0  
 PC 1.00

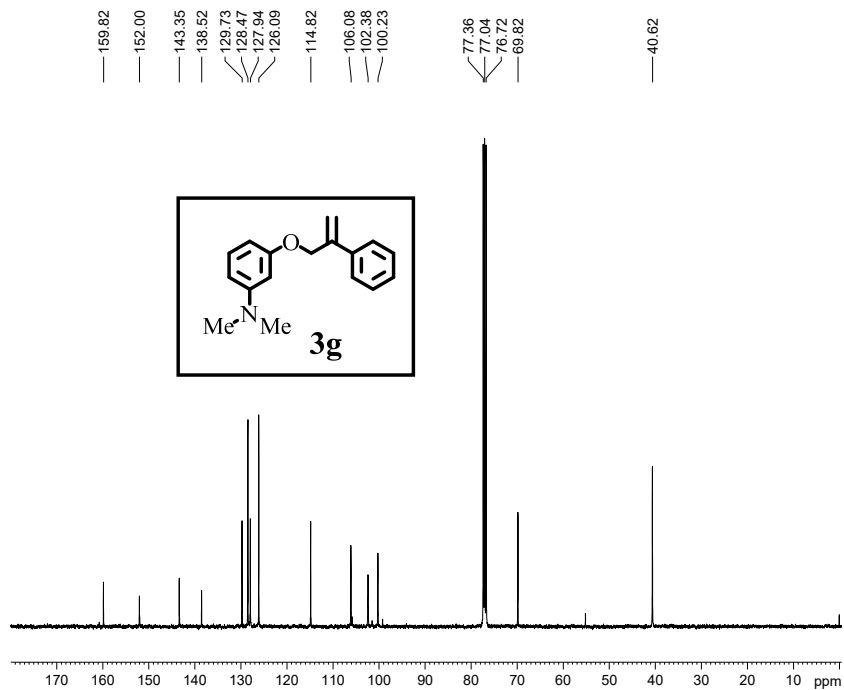

Current Data Parameters  
 NAME 3F NMR  
 EXPNO 1016  
 PROCNO 1

F2 - Acquisition Parameters  
 Date\_ 20230331  
 Time 0.37  
 INSTRUM spect  
 PROBHD 5 mm PABBO BB/  
 PULPROG zgpg30  
 TD 32768  
 SOLVENT CDCl3  
 NS 2584  
 DS 0  
 SWH 24038.461 Hz  
 FIDRES 0.733596 Hz  
 AQ 0.8815744 sec  
 RG 198.09  
 DW 20.800 usec  
 DE 6.50 usec  
 TE 299.7 K  
 D1 2.00000000 sec  
 D11 0.03000000 sec  
 TDO

==== CHANNEL f1 =====  
 SFO1 100.6228298 MHz  
 NUC1 13C  
 P1 10.00 usec  
 PLW1 49.50000000 W

==== CHANNEL f2 =====  
 SFO2 400.1316005 MHz  
 NUC2 1H  
 CPDPRG2 waltz16  
 PCPD2 90.00 usec  
 PLW2 12.50000000 W  
 PLW12 0.34722000 W  
 PLW13 0.28125000 W

F2 - Processing parameters  
 SI 32768  
 SF 100.6127685 MHz  
 WDW EM  
 SSB 0  
 LB 2.00 Hz  
 GB 0  
 PC 1.00

<sup>1</sup>H and <sup>13</sup>C NMR spectra of compound 3h.

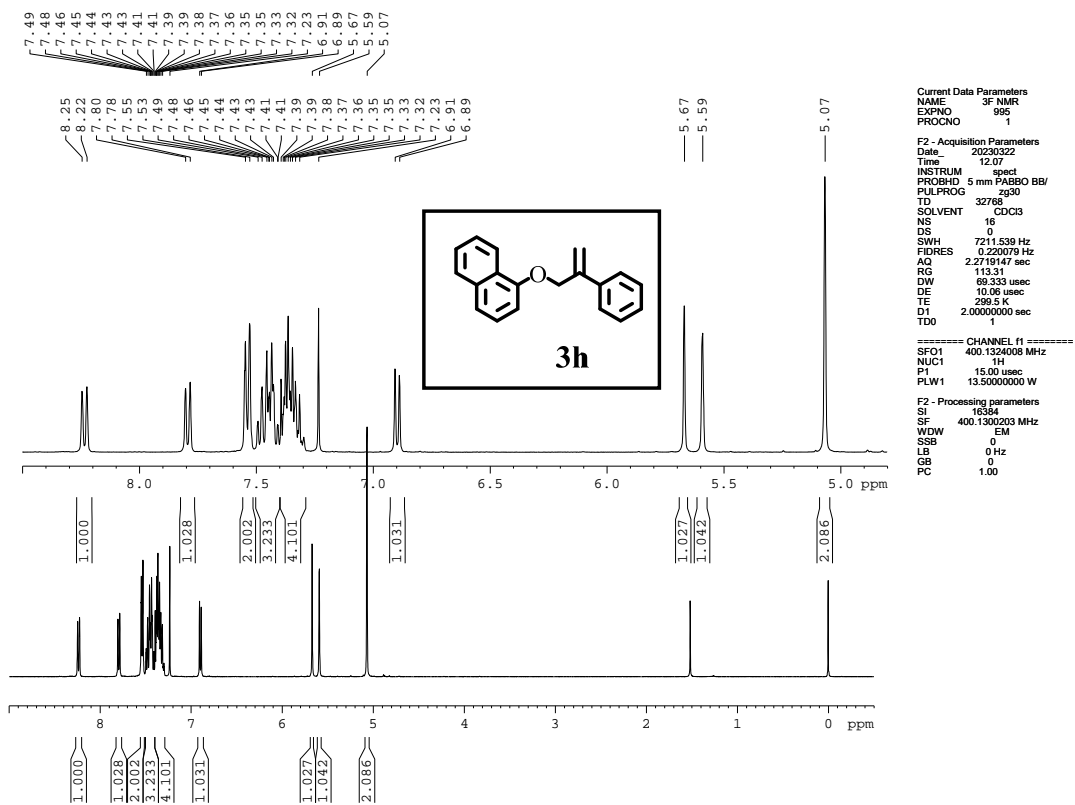

Current Data Parameters  
 NAME 3F NMR  
 EXPNO 995  
 PROCNO 1

F2 - Acquisition Parameters  
 Date\_ 20230322  
 Time 12.07  
 INSTRUM spect  
 PROBHD 5 mm PABBO BB/  
 PULPROG zg30  
 TD 32768  
 SOLVENT CDCl3  
 NS 16  
 DS 0  
 SWH 7211.539 Hz  
 FIDRES 0.220079 Hz  
 AQ 2.2719147 sec  
 RG 113.31  
 DW 89.333 usec  
 DE 10.06 usec  
 TE 298.5 K  
 D1 2.00000000 sec  
 TDO 1

==== CHANNEL f1 =====  
 SFO1 400.1324008 MHz  
 NUC1 1H  
 P1 15.00 usec  
 PLW1 13.50000000 W

F2 - Processing parameters  
 SI 16384  
 SF 400.1300003 MHz  
 WDW EM  
 SSB 0  
 LB 0 Hz  
 GB 0  
 PC 1.00

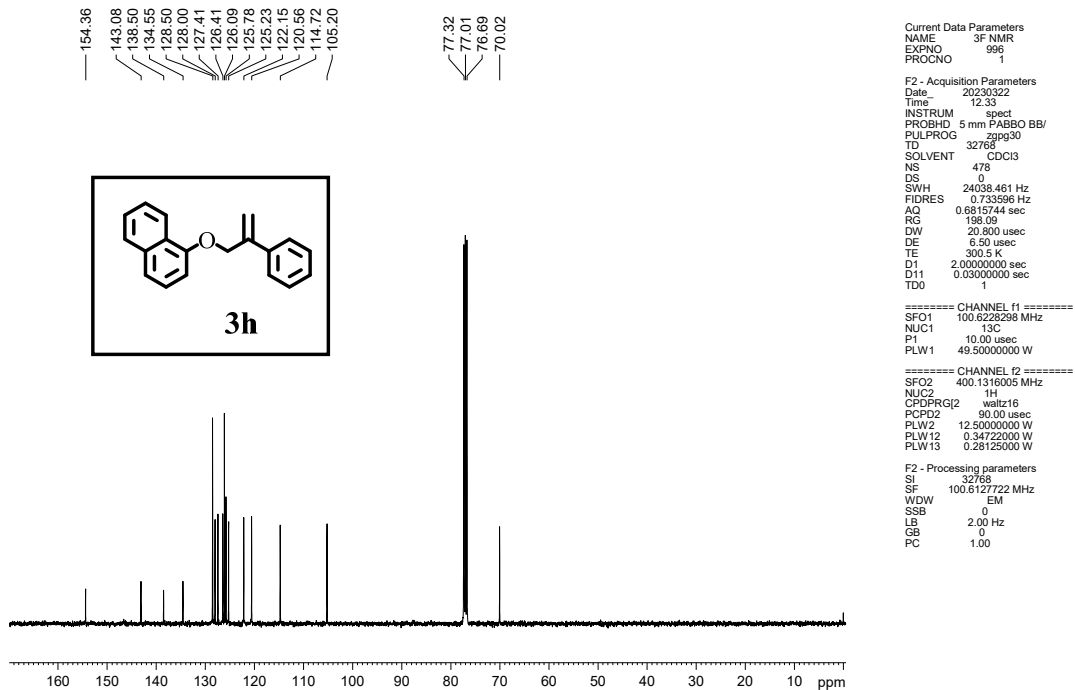

Current Data Parameters  
 NAME 3F NMR  
 EXPNO 996  
 PROCNO 1

F2 - Acquisition Parameters  
 Date\_ 20230322  
 Time 12.33  
 INSTRUM spect  
 PROBHD 5 mm PABBO BB/  
 PULPROG zpg30  
 TD 32768  
 SOLVENT CDCl3  
 NS 478  
 DS 0  
 SWH 24038.461 Hz  
 FIDRES 0.733596 Hz  
 AQ 0.6815744 sec  
 RG 198.09  
 DW 20.800 usec  
 DE 6.50 usec  
 TE 300.5 K  
 D1 2.00000000 sec  
 D11 0.03000000 sec  
 TDO 1

==== CHANNEL f1 =====  
 SFO1 100.6226298 MHz  
 NUC1 13C  
 P1 10.00 usec  
 PLW1 49.50000000 W

==== CHANNEL f2 =====  
 SFO2 400.1316005 MHz  
 NUC2 1H  
 CPDPRG2 waltz16  
 PCPD2 90.00 usec  
 PLW2 12.50000000 W  
 PLW12 0.34722000 W  
 PLW13 0.28125000 W

F2 - Processing parameters  
 SI 32768  
 SF 100.6127722 MHz  
 WDW EM  
 SSB 0  
 LB 2.00 Hz  
 GB 0  
 PC 1.00

# <sup>1</sup>H and <sup>13</sup>C NMR spectra of compound 3i.

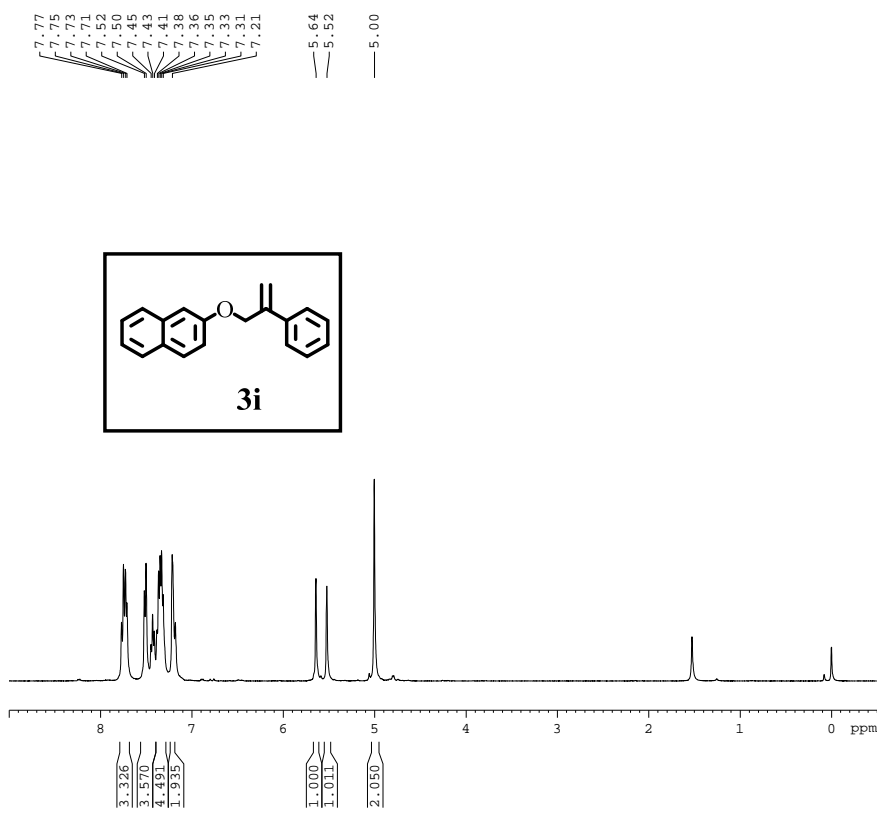

```

Current Data Parameters
NAME      3F NMR
EXPNO    1011
PROCNO   1

F2 - Acquisition Parameters
Date_    20230330
Time     22:20
INSTRUM  spect
PROBHD   5 mm PABBO BB/
PULPROG  zg30
TD        32768
SOLVENT  CDCl3
NS        16
DS        0
SWH       7211.539 Hz
FIDRES   0.220079 Hz
AQ        2.2719147 sec
RG        78.51
DW        69.333 usec
DE        10.06 usec
TE        298.9 K
D1        2.0000000 sec
TD0       1

===== CHANNEL f1 =====
SFO1     400.1324008 MHz
NUC1      1H
P1        15.00 usec
PLW1     13.50000000 W

F2 - Processing parameters
SI        16384
SF        400.1300268 MHz
WDW       EM
SSB       0
LB        0 Hz
GB        0
PC        1.00
    
```

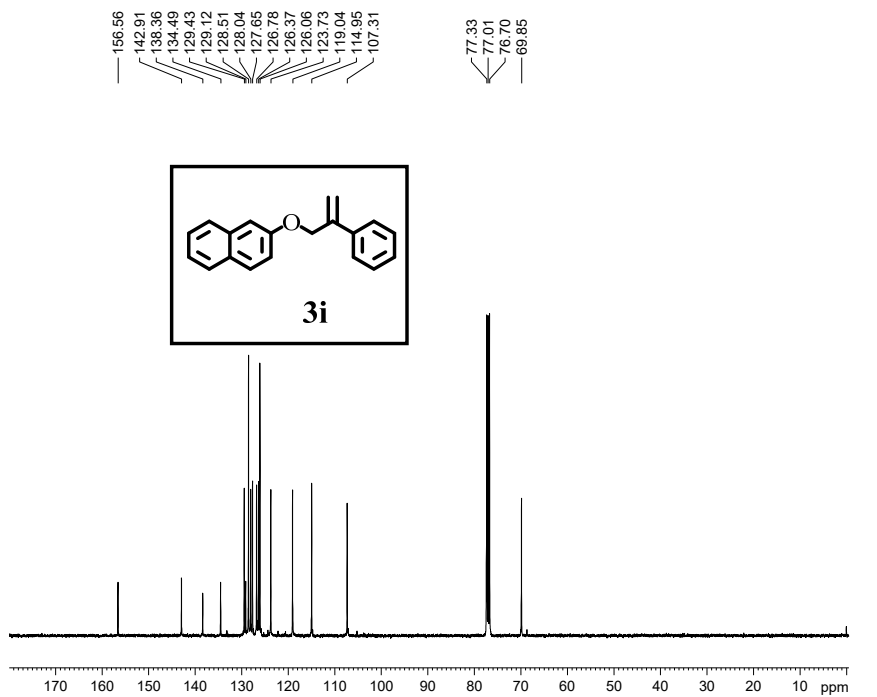

```

Current Data Parameters
NAME      3F NMR
EXPNO    1013
PROCNO   1

F2 - Acquisition Parameters
Date_    20230330
Time     22:32
INSTRUM  spect
PROBHD   5 mm PABBO BB/
PULPROG  zgpg30
TD        32768
SOLVENT  CDCl3
NS        2527
DS        0
SWH       24038.461 Hz
FIDRES   0.733596 Hz
AQ        0.6815744 sec
RG        188.09
DW        20.800 usec
DE        6.50 usec
TE        299.1 K
D1        2.0000000 sec
D11      0.03000000 sec
TD0       1

===== CHANNEL f1 =====
SFO1     100.6228298 MHz
NUC1      13C
P1        10.00 usec
PLW1     49.50000000 W

===== CHANNEL f2 =====
SFO2     400.1316005 MHz
NUC2      1H
CPDPRG2  waltz16
PCPD2    90.00 usec
PLW2     12.50000000 W
PLW12    0.34722000 W
PLW13    0.28125000 W

F2 - Processing parameters
SI        32768
SF        100.6127740 MHz
WDW       EM
SSB       0
LB        2.00 Hz
GB        0
PC        1.00
    
```

# <sup>1</sup>H and <sup>13</sup>C NMR spectra of compound 3j.

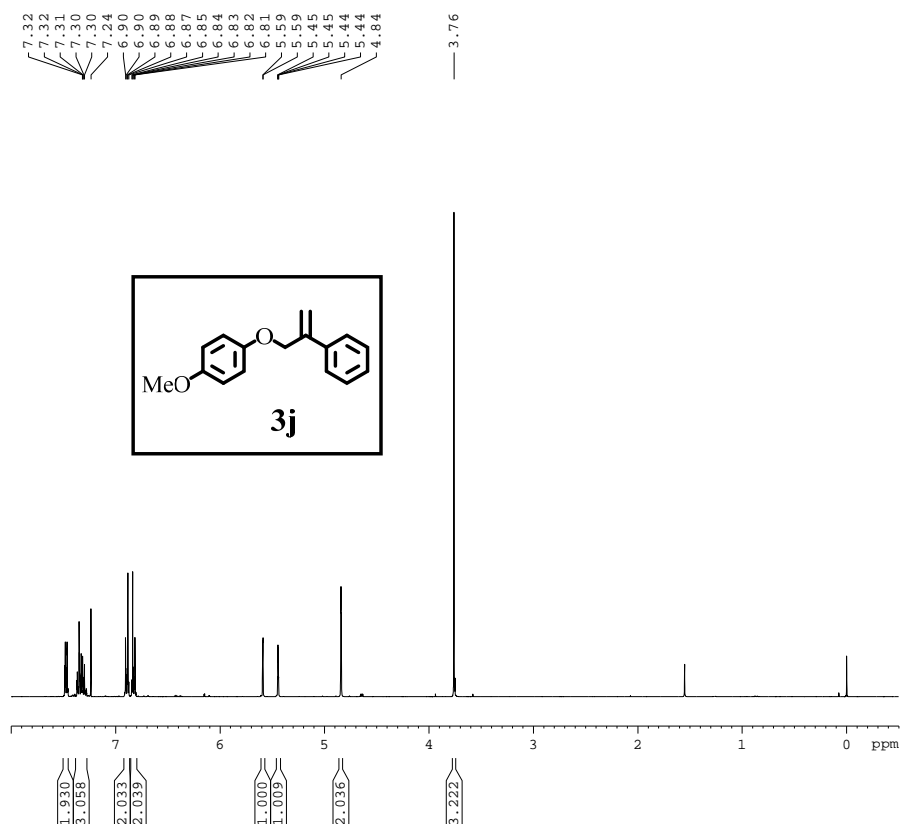

```
Current Data Parameters
NAME      3F NMR
EXPNO    1043
PROCNO   1

F2 - Acquisition Parameters
Date_    20230421
Time     2.47
INSTRUM  spect
PROBHD   5 mm PABBO BB/
PULPROG  zg30
TD        32768
SOLVENT  CDCl3
NS        16
DS        0
SWH      7211.539 Hz
FIDRES   0.220079 Hz
AQ        2.2719147 sec
RG        71.42
DW        69.333 usec
DE        10.06 usec
TE        298.1 K
D1        2.0000000 sec
TD0       1

===== CHANNEL f1 =====
SFO1     400.132408 MHz
NUC1     1H
P1       15.00 usec
PLW1     13.5000000 W

F2 - Processing parameters
SI       16384
SF       400.1300193 MHz
WDW      EM
SSB      0
LB       0 Hz
GB       0
PC       1.00
```

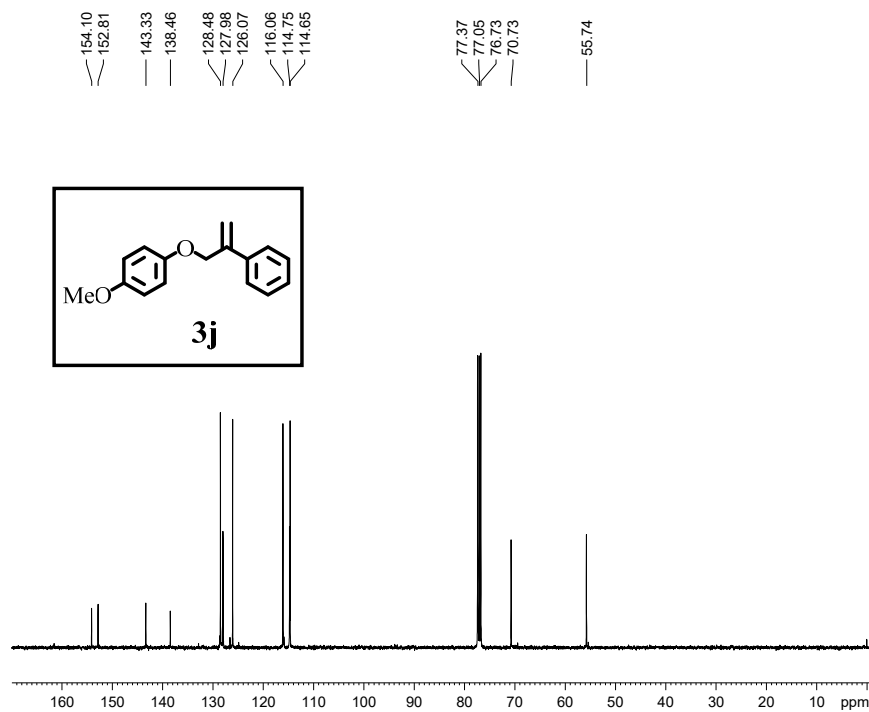

```
Current Data Parameters
NAME      3F NMR
EXPNO    1044
PROCNO   1

F2 - Acquisition Parameters
Date_    20230421
Time     2.50
INSTRUM  spect
PROBHD   5 mm PABBO BB/
PULPROG  zgpg30
TD        32768
SOLVENT  CDCl3
NS        438
DS        0
SWH      24038.461 Hz
FIDRES   0.733596 Hz
AQ        0.6815744 sec
RG        198.09
DW        20.800 usec
DE        6.50 usec
TE        298.6 K
D1        2.0000000 sec
D11      0.0300000 sec
TD0       1

===== CHANNEL f1 =====
SFO1     100.6228298 MHz
NUC1     13C
P1       10.00 usec
PLW1     49.5000000 W

===== CHANNEL f2 =====
SFO2     400.1316005 MHz
NUC2     1H
CPDPRG2  waltz16
POPD2    90.00 usec
PLW2     12.5000000 W
PLW12    0.34722000 W
PLW13    0.28125000 W

F2 - Processing parameters
SI       32768
SF       100.6127885 MHz
WDW      EM
SSB      0
LB       2.00 Hz
GB       0
PC       1.00
```



<sup>1</sup>H and <sup>13</sup>C NMR spectra of compound 3k.

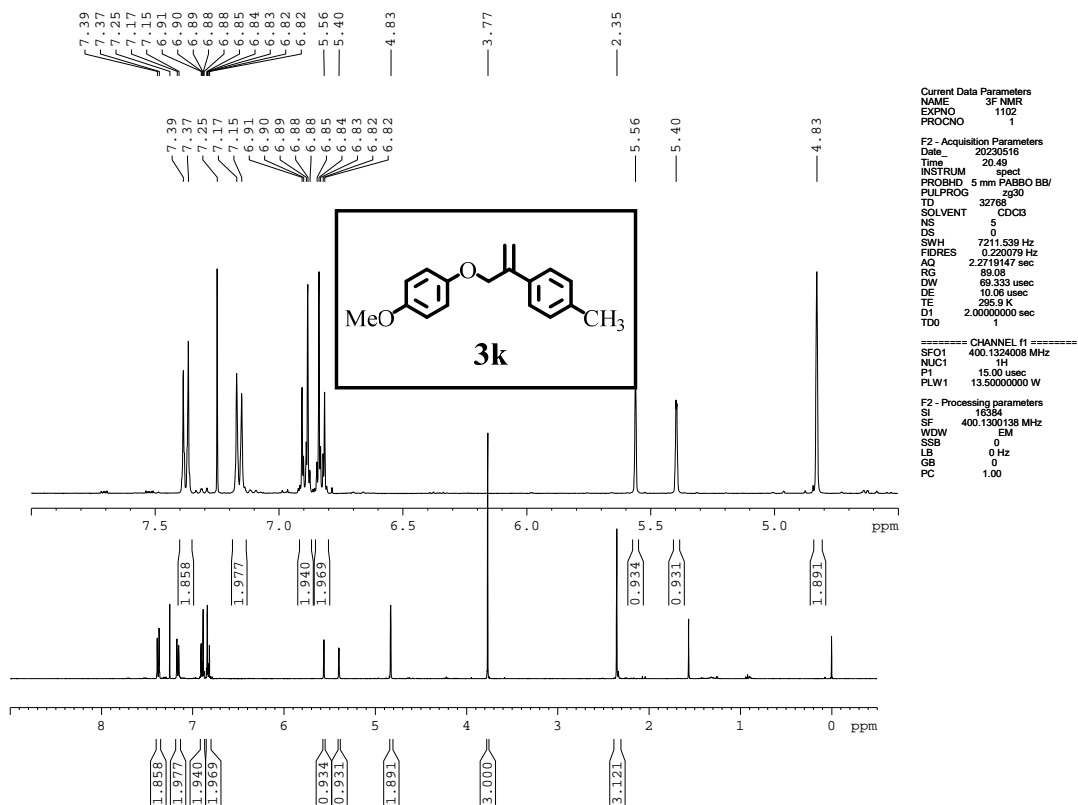

Current Data Parameters  
 NAME 3F NMR  
 EXPNO 1102  
 PROCNO 1

F2 - Acquisition Parameters  
 Date\_ 20230516  
 Time 20:48  
 INSTRUM spect  
 PROBHD 5 mm PABBO BB/  
 PULPROG zg30  
 TD 32768  
 SOLVENT CDCl3  
 NS 5  
 DS 0  
 SWH 7211.539 Hz  
 FIDRES 0.220079 Hz  
 AQ 2.271917 sec  
 RG 89.08  
 DW 89.333 usec  
 DE 10.06 usec  
 TE 295.9 K  
 D1 2.0000000 sec  
 TDO

===== CHANNEL f1 =====  
 SFO1 400.1324008 MHz  
 NUC1 1H  
 P1 15.00 usec  
 PLW1 13.5000000 W

F2 - Processing parameters  
 SI 16384  
 SF 400.1301338 MHz  
 WDW EM  
 SSB 0  
 LB 0 Hz  
 GB 0  
 PC 1.00

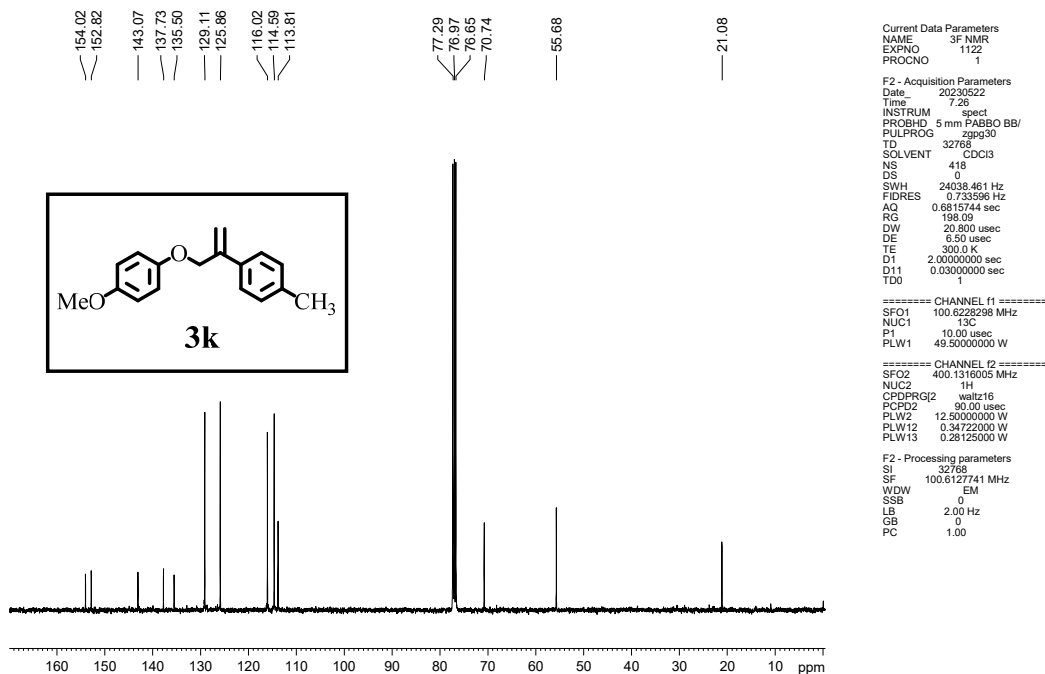

Current Data Parameters  
 NAME 3F NMR  
 EXPNO 1122  
 PROCNO 1

F2 - Acquisition Parameters  
 Date\_ 20230522  
 Time 7:26  
 INSTRUM spect  
 PROBHD 5 mm PABBO BB/  
 PULPROG zgpg30  
 TD 32768  
 SOLVENT CDCl3  
 NS 418  
 DS 0  
 SWH 24038.461 Hz  
 FIDRES 0.733596 Hz  
 AQ 0.6815744 sec  
 RG 198.09  
 DW 20.800 usec  
 DE 6.50 usec  
 TE 300.0 K  
 D1 2.0000000 sec  
 D11 0.0300000 sec  
 TDO

===== CHANNEL f1 =====  
 SFO1 100.6225298 MHz  
 NUC1 13C  
 P1 10.00 usec  
 PLW1 49.5000000 W

===== CHANNEL f2 =====  
 SFO2 400.1316005 MHz  
 NUC2 1H  
 CPDPRG2 waltz16  
 PCPD2 90.00 usec  
 PLW2 12.5000000 W  
 PLW12 0.34722000 W  
 PLW13 0.28125000 W

F2 - Processing parameters  
 SI 32768  
 SF 100.6127741 MHz  
 WDW EM  
 SSB 0  
 LB 2.00 Hz  
 GB 0  
 PC 1.00

<sup>1</sup>H and <sup>13</sup>C NMR spectra of compound 31.

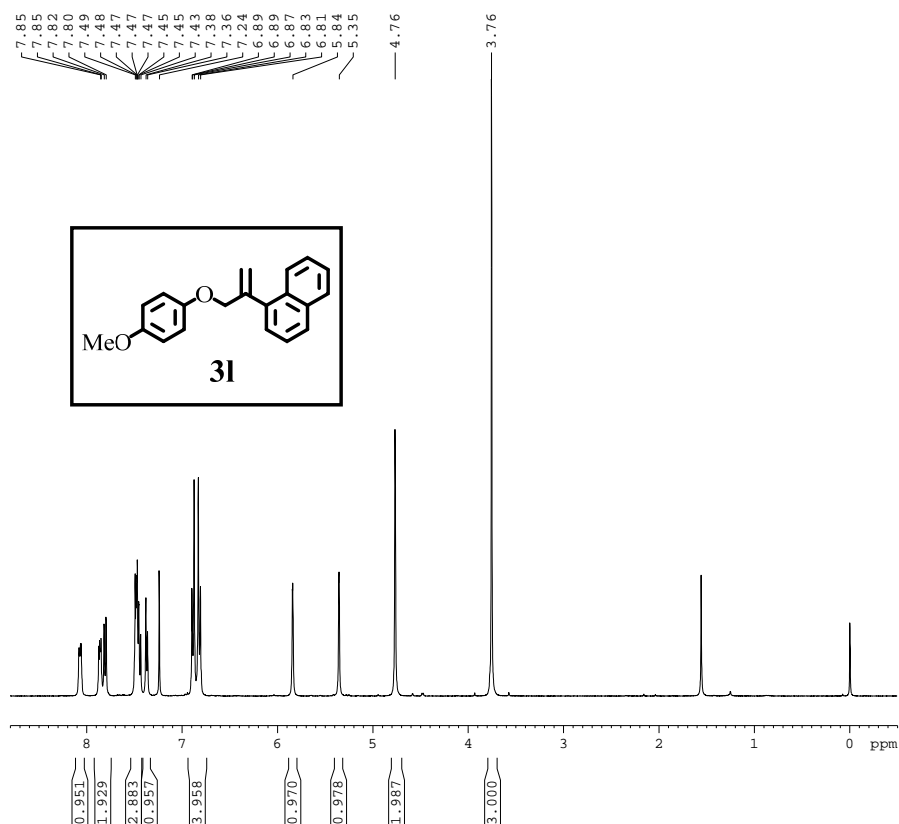

```
Current Data Parameters
NAME      3F NMR
EXPNO    1106
PROCNO   1

F2 - Acquisition Parameters
Date_    20230517
Time     20:49
INSTRUM  spect
PROBHD   5 mm PABBO BB/
PULPROG  zg30
TD       32768
SOLVENT  CDCl3
NS       16
DS       0
SWH      7211.539 Hz
FIDRES   0.220079 Hz
AQ       2.2719147 sec
RG       89.98
DW       69.333 usec
DE       10.06 usec
TE       296.5 K
D1       2.0000000 sec
TD0      1

===== CHANNEL f1 =====
SFO1    400.1324008 MHz
NUC1    1H
P1      15.00 usec
PLW1    13.5000000 W

F2 - Processing parameters
SI      1638
SF      400.1300189 MHz
WDW     EM
SSB     0
LB      0 Hz
GB      0
PC      1.00
```

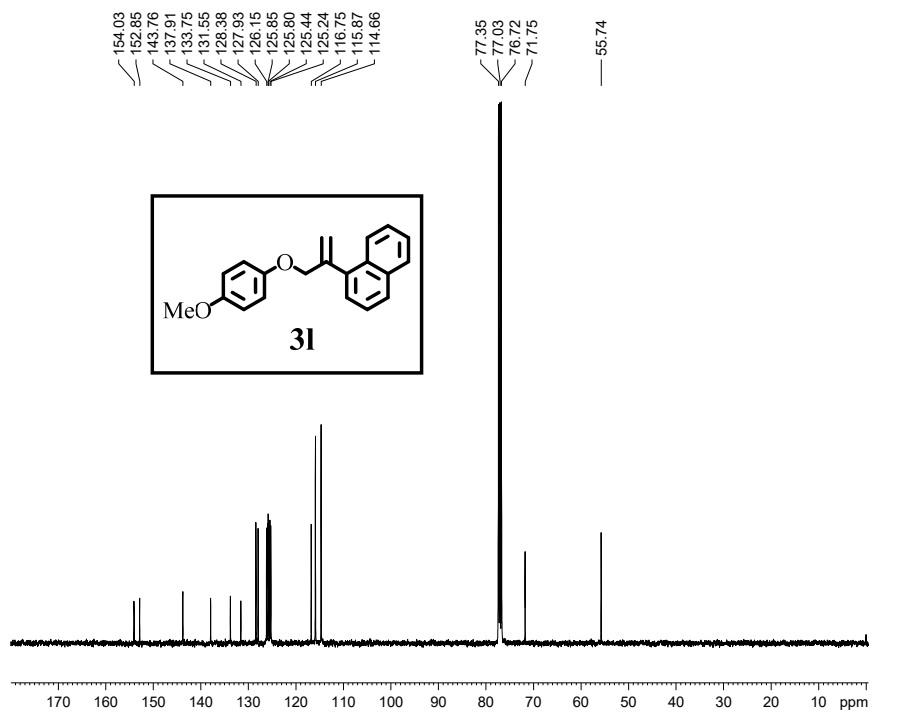

```
Current Data Parameters
NAME      3F NMR
EXPNO    1107
PROCNO   1

F2 - Acquisition Parameters
Date_    20230517
Time     20:51
INSTRUM  spect
PROBHD   5 mm PABBO BB/
PULPROG  zgpg30
TD       32768
SOLVENT  CDCl3
NS       651
DS       0
SWH      24038.461 Hz
FIDRES   0.733596 Hz
AQ       0.6815744 sec
RG       198.09
DW       20.800 usec
DE       6.50 usec
TE       296.6 K
D1       2.0000000 sec
D11      0.0300000 sec
TD0      1

===== CHANNEL f1 =====
SFO1    100.6228298 MHz
NUC1    13C
P1      10.00 usec
PLW1    49.5000000 W

===== CHANNEL f2 =====
SFO2    400.1316005 MHz
NUC2    1H
CPDPRG2  waltz16
POPD2    90.00 usec
PLW2    12.5000000 W
PLW12   0.34722000 W
PLW13   0.28125000 W

F2 - Processing parameters
SI      32768
SF      100.6127885 MHz
WDW     EM
SSB     0
LB      2.00 Hz
GB      0
PC      1.00
```

<sup>1</sup>H and <sup>13</sup>C NMR spectra of compound 3m.

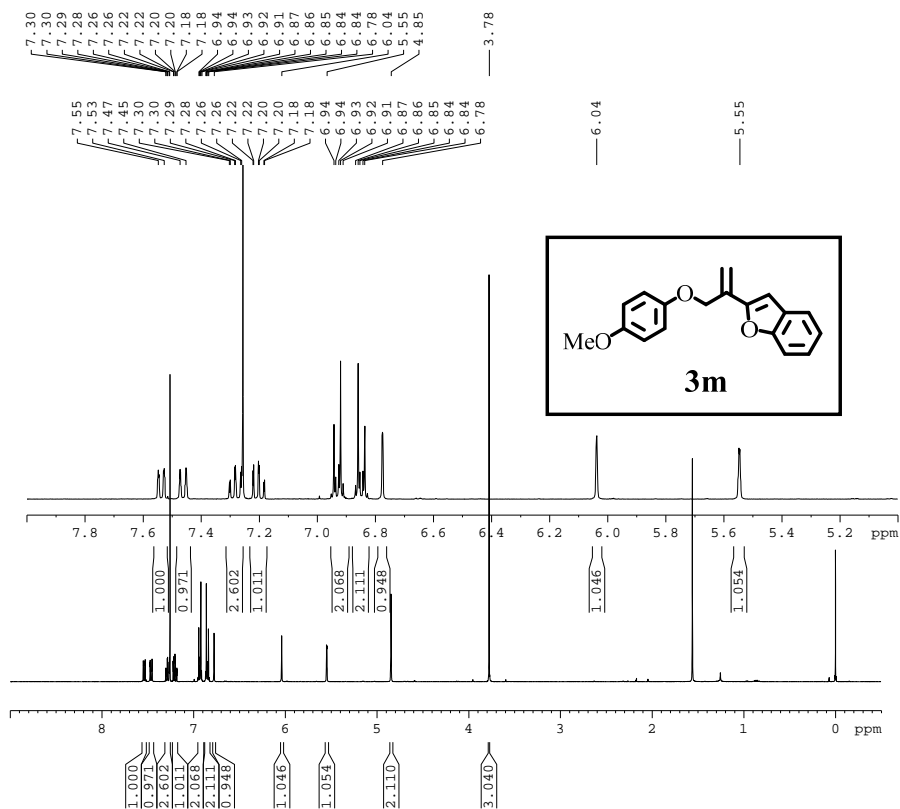

Current Data Parameters  
 NAME 3F-NMR  
 EXPNO 1108  
 PROCNO 1

F2 - Acquisition Parameters  
 Date\_ 20230518  
 Time 21.44  
 INSTRUM spect  
 PROBHD 5 mm PABBO BB/  
 PULPROG zg30  
 TD 32768  
 SOLVENT CDCl3  
 NS 16  
 DS 0  
 SWH 7211.539 Hz  
 FIDRES 0.220079 Hz  
 AQ 2.2719147 sec  
 RG 158.74  
 DW 69.333 usec  
 DE 10.06 usec  
 TE 298.5 K  
 D1 2.0000000 sec  
 TD0 1

===== CHANNEL f1 =====  
 SFO1 400.1324008 MHz  
 NUC1 1H  
 P1 15.00 usec  
 PLW1 13.5000000 W  
 F2 - Processing parameters  
 SI 16384  
 SF 400.1300111 MHz  
 WDW EM  
 SSB 0  
 LB 0 Hz  
 GB 0  
 PC 1.00

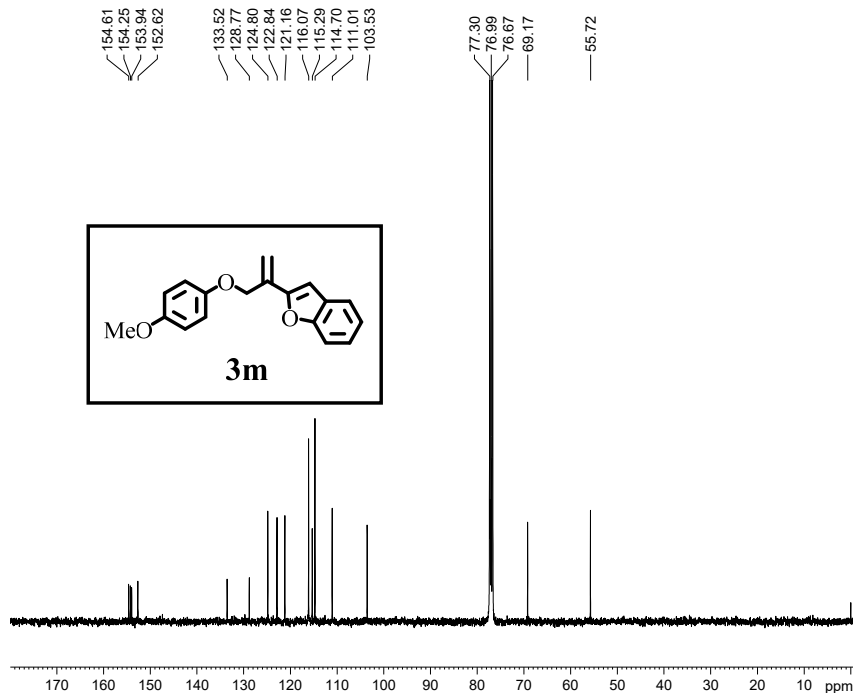

Current Data Parameters  
 NAME 3F NMR  
 EXPNO 1109  
 PROCNO 1

F2 - Acquisition Parameters  
 Date\_ 20230522  
 Time 5.57  
 INSTRUM spect  
 PROBHD 5 mm PABBO BB/  
 PULPROG zgpg30  
 TD 32768  
 SOLVENT CDCl3  
 NS 1714  
 DS 0  
 SWH 24038.461 Hz  
 FIDRES 0.733596 Hz  
 AQ 0.6815744 sec  
 RG 198.09  
 DW 20.800 usec  
 DE 6.50 usec  
 TE 298.5 K  
 D1 2.0000000 sec  
 D11 0.0300000 sec  
 TD0 1

===== CHANNEL f1 =====  
 SFO1 100.6228298 MHz  
 NUC1 13C  
 P1 10.00 usec  
 PLW1 49.5000000 W  
 ===== CHANNEL f2 =====  
 SFO2 400.1316005 MHz  
 NUC2 1H  
 CPDPRG2 waltz16  
 PCPD2 90.00 usec  
 PLW2 12.5000000 W  
 PLW12 0.34722000 W  
 PLW13 0.28125000 W

F2 - Processing parameters  
 SI 32768  
 SF 100.6127705 MHz  
 WDW EM  
 SSB 0  
 LB 2.00 Hz  
 GB 0  
 PC 1.00

# <sup>1</sup>H and <sup>13</sup>C NMR spectra of compound 3n.

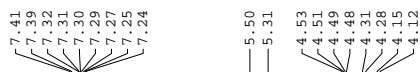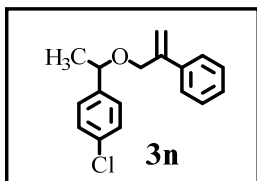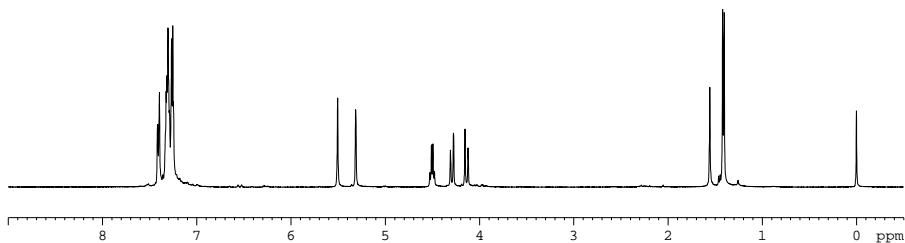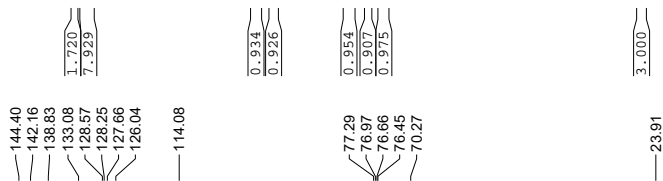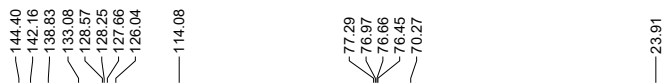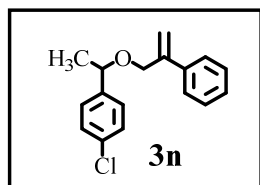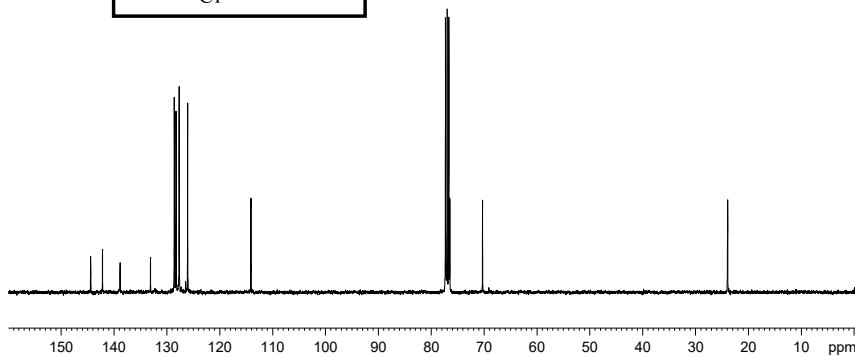

Current Data Parameters  
 NAME 3F NMR  
 EXPNO 1175  
 PROCNO 1

F2 - Acquisition Parameters  
 Date\_ 20230615  
 Time 8.13  
 INSTRUM spect  
 PROBHD 5 mm PABBO BB/  
 PULPROG zg30  
 TD 32768  
 SOLVENT CDCl3  
 NS 16  
 DS 0  
 SWH 7211.539 Hz  
 FIDRES 0.220079 Hz  
 AQ 2.2719147 sec  
 RG 113.31  
 DW 89.333 usec  
 DE 10.06 usec  
 TE 298.6 K  
 D1 2.0000000 sec  
 TD0 1

===== CHANNEL f1 =====  
 SFO1 400.132408 MHz  
 NUC1 1H  
 P1 15.00 usec  
 PLW1 13.5000000 W

F2 - Processing parameters  
 SI 16384  
 SF 400.130130 MHz  
 WDW EM  
 SSB 0  
 LB 0 Hz  
 GB 0  
 PC 1.00

Current Data Parameters  
 NAME 3F NMR  
 EXPNO 1180  
 PROCNO 1

F2 - Acquisition Parameters  
 Date\_ 20230615  
 Time 20.26  
 INSTRUM spect  
 PROBHD 5 mm PABBO BB/  
 PULPROG zgpg30  
 TD 32768  
 SOLVENT CDCl3  
 NS 677  
 DS 0  
 SWH 24038.461 Hz  
 FIDRES 0.733596 Hz  
 AQ 0.6815744 sec  
 RG 198.09  
 DW 20.80 usec  
 DE 6.50 usec  
 TE 299.0 K  
 D1 2.0000000 sec  
 D11 0.0300000 sec  
 TD0 1

===== CHANNEL f1 =====  
 SFO1 100.6228298 MHz  
 NUC1 13C  
 P1 10.00 usec  
 PLW1 49.5000000 W

===== CHANNEL f2 =====  
 SFO2 400.1316005 MHz  
 NUC2 1H  
 CPDPRG2 waltz16  
 PCPD2 90.00 usec  
 PLW2 12.5000000 W  
 PLW12 0.3472200 W  
 PLW13 0.28125000 W

F2 - Processing parameters  
 SI 32768  
 SF 100.6127741 MHz  
 WDW EM  
 SSB 0  
 LB 2.00 Hz  
 GB 0  
 PC 1.00

<sup>1</sup>H and <sup>13</sup>C NMR spectra of compound 30.

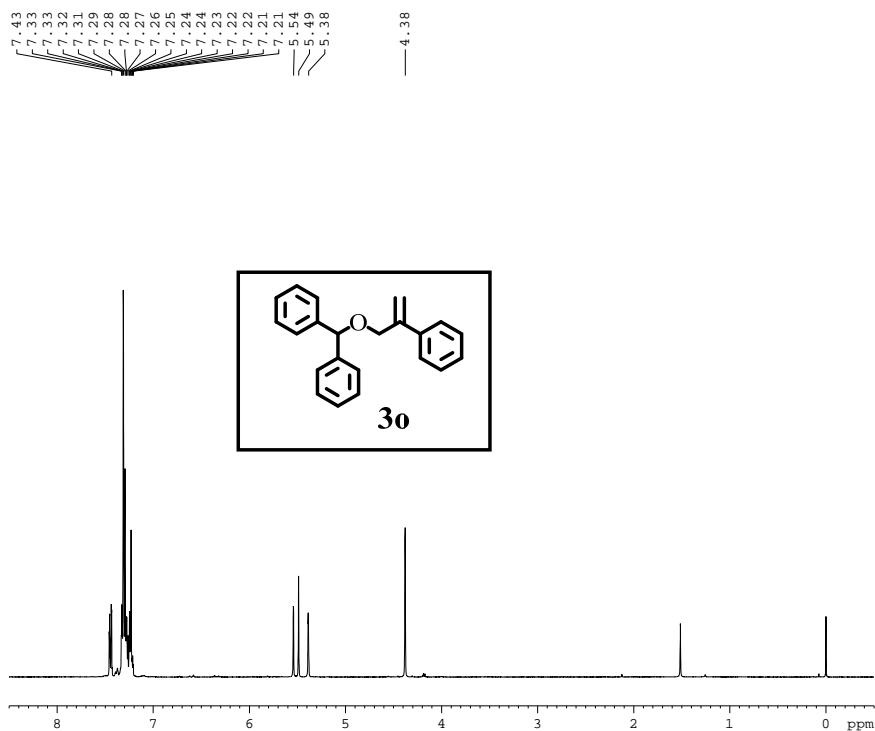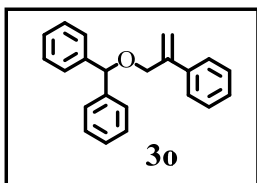

Current Data Parameters  
 NAME 3F NMR  
 EXPNO 1171  
 PROCNO 1  
 F2 - Acquisition Parameters  
 Date\_ 20230614  
 Time 7.10  
 INSTRUM spect  
 PROBHD 5 mm PABBO BB/  
 PULPROG zg30  
 TD 32768  
 SOLVENT CDCl3  
 NS 16  
 DS 0  
 SWH 7211.539 Hz  
 FIDRES 0.220079 Hz  
 AQ 2.2719147 sec  
 RG 89.08  
 DW 69.333 usec  
 DE 10.06 usec  
 TE 298.8 K  
 D1 2.0000000 sec  
 TDO 1  
 ===== CHANNEL f1 =====  
 SFO1 400.1324008 MHz  
 NUC1 1H  
 P1 15.00 usec  
 PLW1 13.50000000 W  
 F2 - Processing parameters  
 SI 16384  
 SF 400.1300222 MHz  
 WDW EM  
 SSB 0  
 LB 0 Hz  
 GB 0  
 PC 1.00

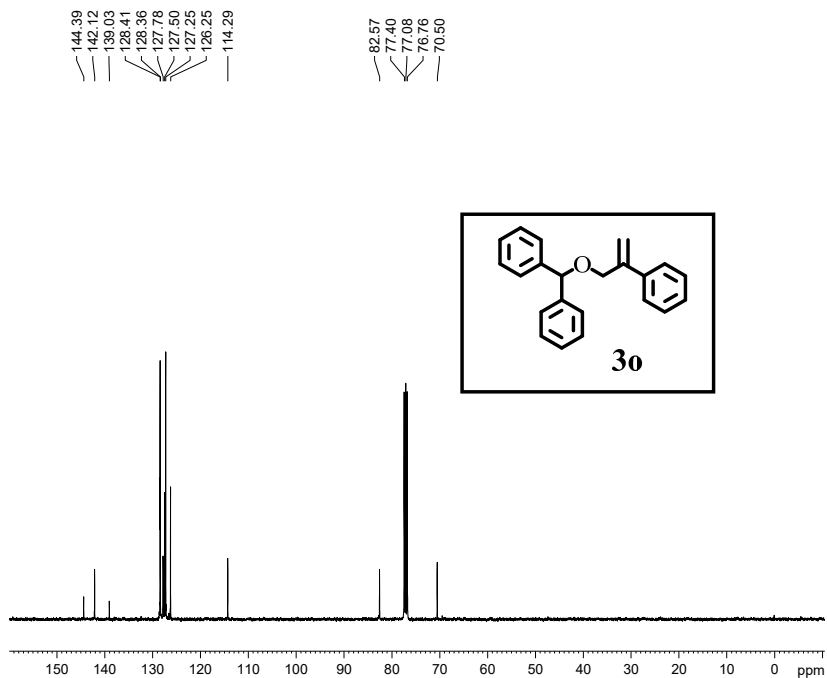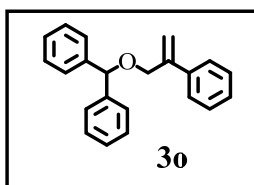

Current Data Parameters  
 NAME 3F NMR  
 EXPNO 1172  
 PROCNO 1  
 F2 - Acquisition Parameters  
 Date\_ 20230615  
 Time 19.54  
 INSTRUM spect  
 PROBHD 5 mm PABBO BB/  
 PULPROG zpgp30  
 TD 32768  
 SOLVENT CDCl3  
 NS 461  
 DS 0  
 SWH 24038.461 Hz  
 FIDRES 0.733596 Hz  
 AQ 0.6815744 sec  
 RG 198.09  
 DW 20.800 usec  
 DE 6.50 usec  
 TE 300.1 K  
 D1 2.0000000 sec  
 D11 0.0300000 sec  
 TDO 1  
 ===== CHANNEL f1 =====  
 SFO1 100.6228298 MHz  
 NUC1 13C  
 P1 10.00 usec  
 PLW1 49.50000000 W  
 ===== CHANNEL f2 =====  
 SFO2 400.1316005 MHz  
 NUC2 1H  
 CPOPRG2 waltz16  
 PCPD2 90.00 usec  
 PLW2 12.50000000 W  
 PLW12 0.34722000 W  
 PLW13 0.28125000 W  
 F2 - Processing parameters  
 SI 32768  
 SF 100.6127644 MHz  
 WDW EM  
 SSB 0  
 LB 2.00 Hz  
 GB 0  
 PC 1.00

# <sup>1</sup>H and <sup>13</sup>C NMR spectra of compound 3p.

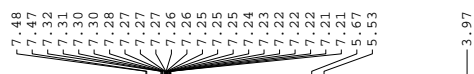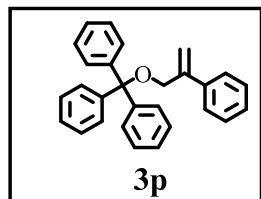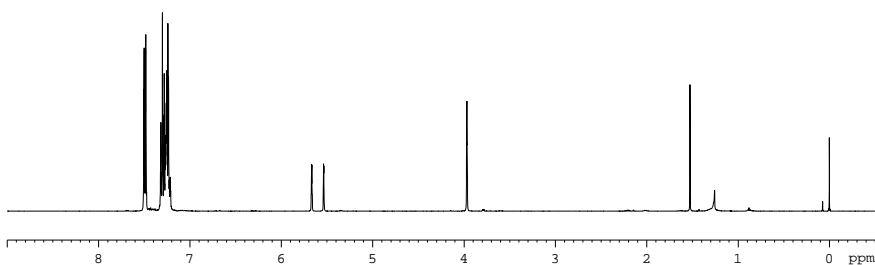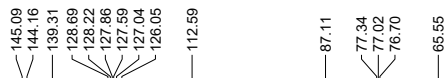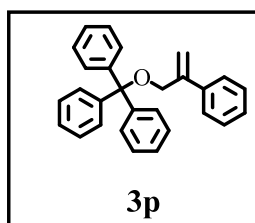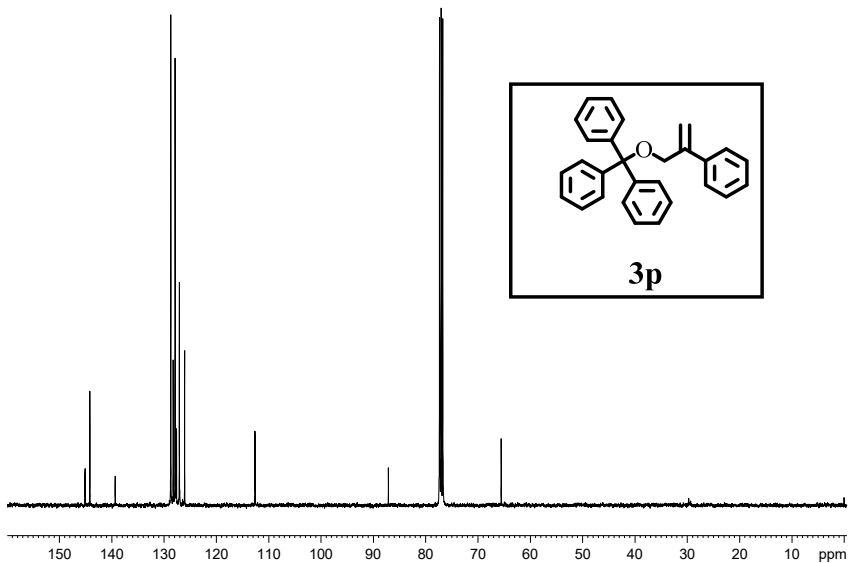

```

Current Data Parameters
NAME      3F NMR
EXPNO    1222
PROCNO   1

F2 - Acquisition Parameters
Date_    20230705
Time     10.10
INSTRUM  spect
PROBHD   5 mm PABBO BB/
PULPROG  zg30
TD        32768
SOLVENT  CDCl3
NS        16
DS        0
SWH       7211.539 Hz
FIDRES    0.220079 Hz
AQ        2.2719147 sec
RG        98.08
DW        69.333 usec
DE        10.06 usec
TE        298.3 K
D1        2.0000000 sec
TD0       1

===== CHANNEL f1 =====
SFO1     400.1324008 MHz
NUC1      1H
P1        15.00 usec
PLW1     13.50000000 W

F2 - Processing parameters
SI        16384
SF        400.13008181 MHz
WDW       EM
SSB       0
LB        0 Hz
GB        0
PC        1.00
    
```

```

Current Data Parameters
NAME      3F NMR
EXPNO    1223
PROCNO   1

F2 - Acquisition Parameters
Date_    20230705
Time     10.13
INSTRUM  spect
PROBHD   5 mm PABBO BB/
PULPROG  zgpg30
TD        32768
SOLVENT  CDCl3
NS        852
DS        0
SWH       24038.461 Hz
FIDRES    0.733596 Hz
AQ        0.6815744 sec
RG        198.09
DW        22.800 usec
DE        6.50 usec
TE        298.7 K
D1        2.0000000 sec
D11       0.0300000 sec
TD0       1

===== CHANNEL f1 =====
SFO1     100.6228298 MHz
NUC1      13C
P1        10.00 usec
PLW1     49.50000000 W

===== CHANNEL f2 =====
SFO2     400.1316005 MHz
NUC2      1H
PCPD2    90.00 usec
PLW2     12.50000000 W
PLW12    0.34722000 W
PLW13    0.28125000 W

F2 - Processing parameters
SI        32768
SF        100.6127686 MHz
WDW       EM
SSB       0
LB        2.00 Hz
GB        0
PC        1.00
    
```

# <sup>1</sup>H and <sup>13</sup>C NMR spectra of compound 3q.

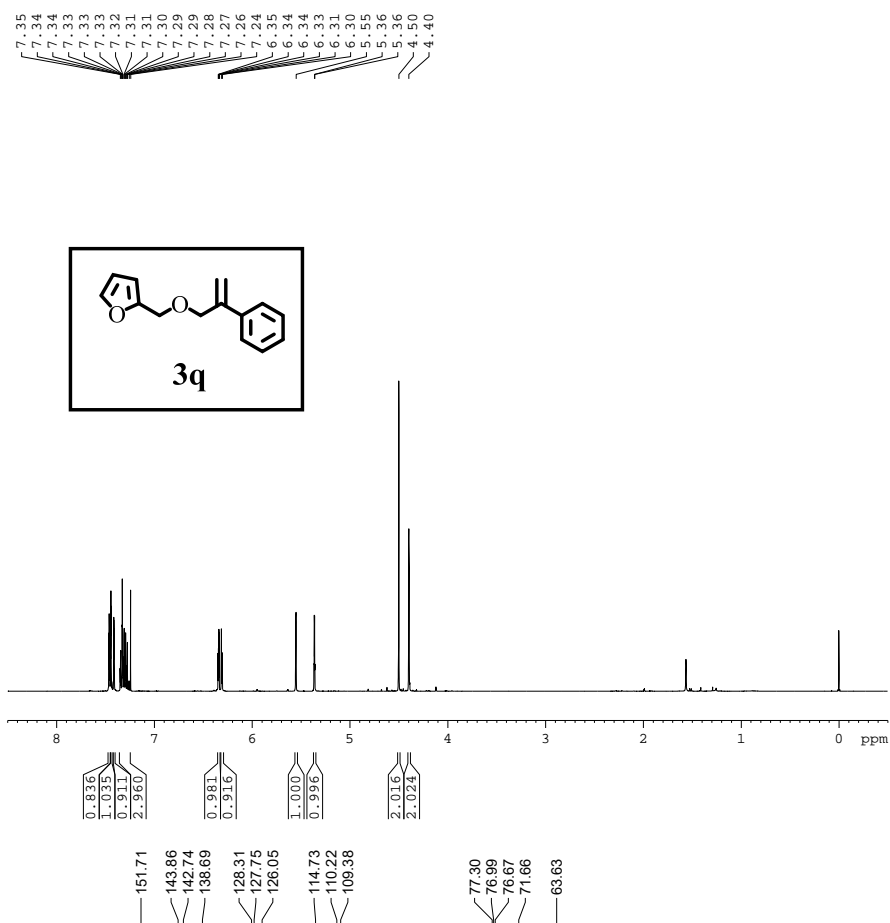

```

Current Data Parameters
NAME      3F NMR
EXPNO    1037
PROCNO   1

F2 - Acquisition Parameters
Date_    20230418
Time     7.31
INSTRUM  spect
PROBHD   5 mm F4BBO BB/
PULPROG  zg30
TD        32768
SOLVENT  CDCl3
NS        16
DS        0
SWH       7211.539 Hz
FIDRES   0.220079 Hz
AQ        2.2719147 sec
RG        78.51
DW        69.333 usec
DE        10.06 usec
TE        298.7 K
D1        2.0000000 sec
TD0       1

===== CHANNEL f1 =====
SFO1     400.1324038 MHz
NUC1     1H
P1       15.00 usec
PLW1    13.5000000 W

F2 - Processing parameters
SI        16384
SF        400.1300173 MHz
WDW       EM
SSB       0
LB        0 Hz
GB        0
PC        1.00
    
```

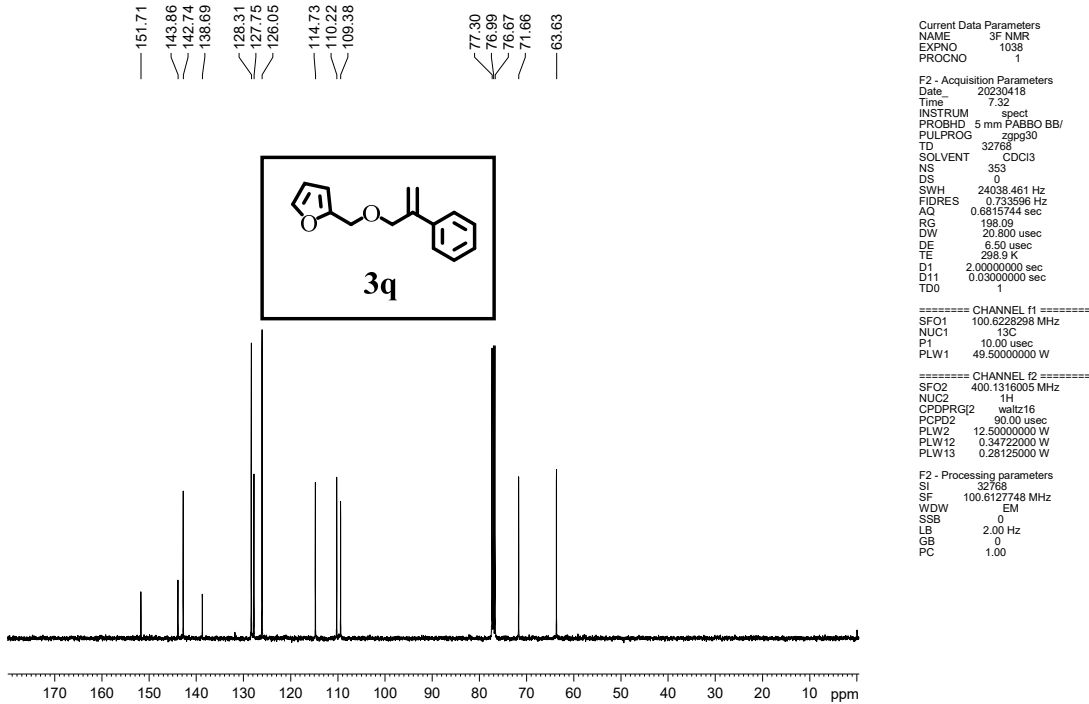

```

Current Data Parameters
NAME      3F NMR
EXPNO    1038
PROCNO   1

F2 - Acquisition Parameters
Date_    20230418
Time     7.32
INSTRUM  spect
PROBHD   5 mm F4BBO BB/
PULPROG  zgpg30
TD        32768
SOLVENT  CDCl3
NS        353
DS        0
SWH       24038.461 Hz
FIDRES   0.733598 Hz
AQ        0.6815744 sec
RG        198.09
DW        20.800 usec
DE        6.50 usec
TE        298.9 K
D1        2.0000000 sec
D11     0.0300000 sec
TD0       1

===== CHANNEL f1 =====
SFO1     100.6228298 MHz
NUC1     13C
P1       10.00 usec
PLW1    49.5000000 W

===== CHANNEL f2 =====
SFO2     400.1316005 MHz
NUC2     1H
CPDPRG2  waltz16
PCPD2    90.00 usec
PLW2    12.5000000 W
PLW12   0.3472000 W
PLW13   0.28125000 W

F2 - Processing parameters
SI        32768
SF        100.6127748 MHz
WDW       EM
SSB       0
LB        2.00 Hz
GB        0
PC        1.00
    
```

# <sup>1</sup>H and <sup>13</sup>C NMR spectra of compound 4a.

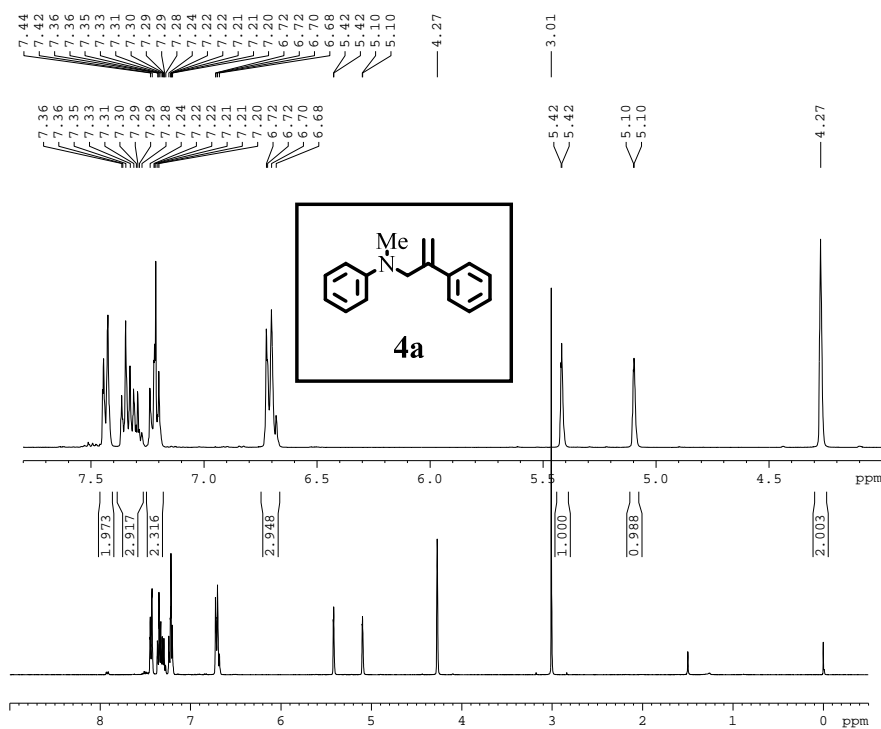

Current Data Parameters  
 NAME 3F NMR  
 EXPNO 960  
 PROCNO 1

F2 - Acquisition Parameters  
 Date\_ 20230321  
 Time 2.19  
 INSTRUM spect  
 PROBHD 5 mm PABBO BB/  
 PULPROG zg30  
 TD 32768  
 SOLVENT CDCl3  
 NS 6  
 DS 0  
 SWH 7211.539 Hz  
 FIDRES 0.220079 Hz  
 AQ 2.2719147 sec  
 RG 71.42  
 DW 68.333 usec  
 DE 10.36 usec  
 TE 299.1 K  
 D1 2.00000000 sec  
 TDO

===== CHANNEL f1 =====  
 SFO1 400.1324008 MHz  
 NUC1 1H  
 P1 15.00 usec  
 PLW1 13.5000000 W

F2 - Processing parameters  
 SI 32768  
 SF 400.1300284 MHz  
 WDW EM  
 SSB 0  
 LB 0 Hz  
 GB 0  
 PC 1.00

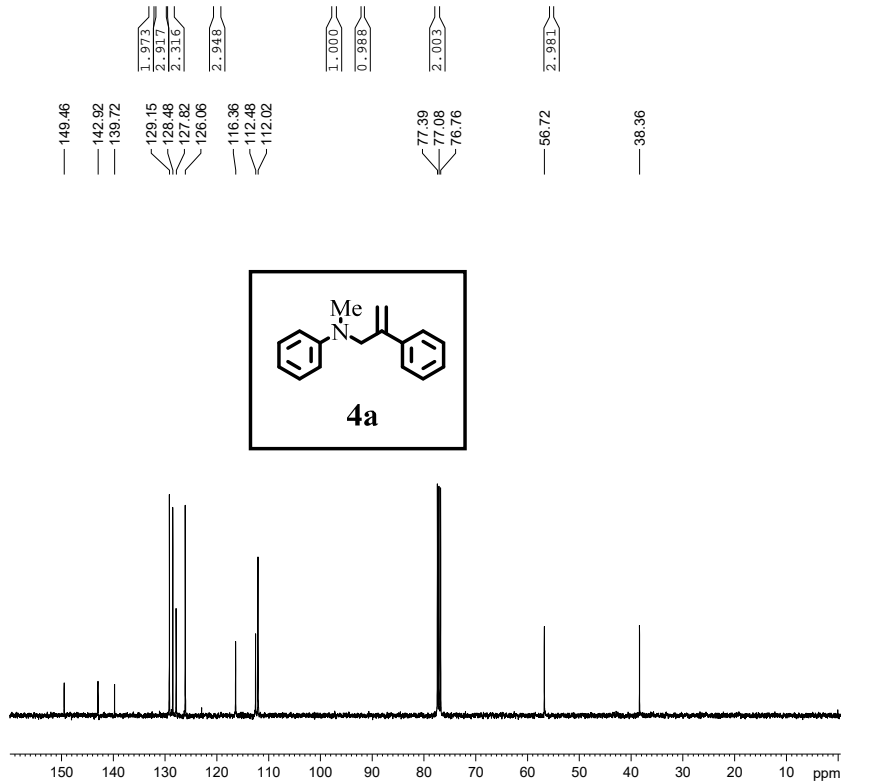

Current Data Parameters  
 NAME 3F NMR  
 EXPNO 961  
 PROCNO 1

F2 - Acquisition Parameters  
 Date\_ 20230321  
 Time 2.20  
 INSTRUM spect  
 PROBHD 5 mm PABBO BB/  
 PULPROG zgpg30  
 TD 32768  
 SOLVENT CDCl3  
 NS 102  
 DS 0  
 SWH 24038.461 Hz  
 FIDRES 0.733596 Hz  
 AQ 0.6815744 sec  
 RG 198.09  
 DW 20.800 usec  
 DE 6.50 usec  
 TE 299.2 K  
 D1 2.00000000 sec  
 D11 0.03000000 sec  
 TDO

===== CHANNEL f1 =====  
 SFO1 100.6228298 MHz  
 NUC1 13C  
 P1 10.00 usec  
 PLW1 49.5000000 W

===== CHANNEL f2 =====  
 SFO2 400.1316005 MHz  
 NUC2 1H  
 CPDPRG2 waltz16  
 PCPD2 90.00 usec  
 PLW2 12.50000000 W  
 PLW12 0.34722000 W  
 PLW13 0.28125000 W

F2 - Processing parameters  
 SI 32768  
 SF 100.6127685 MHz  
 WDW EM  
 SSB 0  
 LB 2.00 Hz  
 GB 0  
 PC 1.00



# <sup>1</sup>H and <sup>13</sup>C NMR spectra of compound 4b.

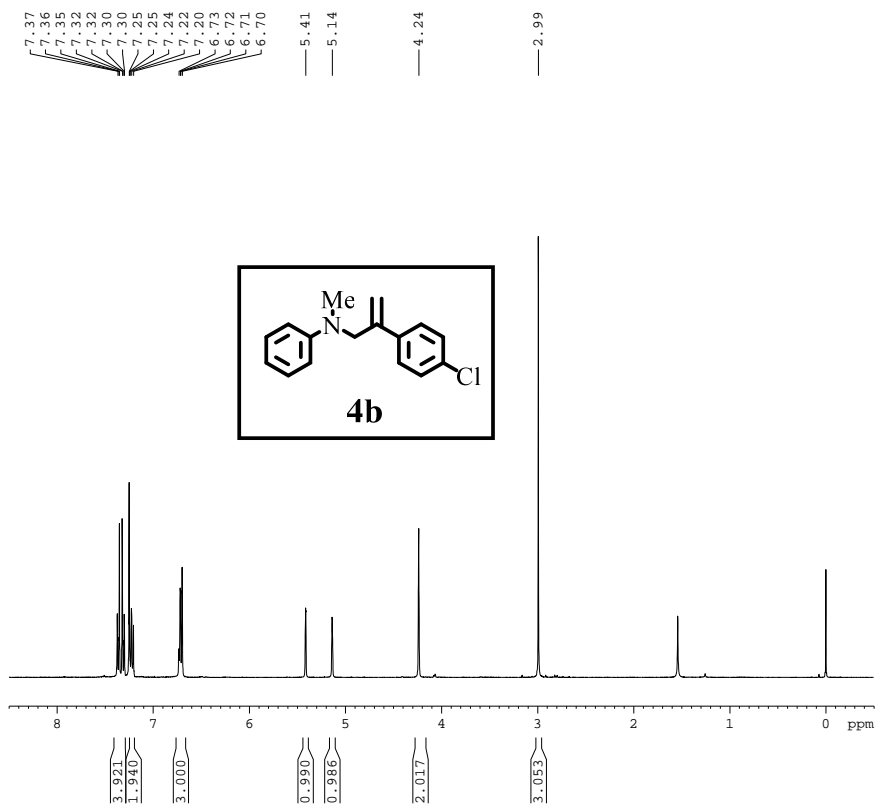

```

Current Data Parameters
NAME      3F NMR
EXPNO    1153
PROCNO   1

F2 - Acquisition Parameters
Date_    20230607
Time     21:42
INSTRUM  spect
PROBHD   5 mm PABBO BB/
PULPROG  zg30
TD       32768
SOLVENT  CDCl3
NS       16
DS       0
SWH      7211.539 Hz
FIDRES   0.220079 Hz
AQ       2.2719147 sec
RG       113.31
DW       69.333 usec
DE       10.06 usec
TE       298.7 K
D1       2.0000000 sec
TD0      1

===== CHANNEL f1 =====
SFO1    400.1324008 MHz
NUC1     1H
P1       15.00 usec
PLW1    13.50000000 W

F2 - Processing parameters
SI       16384
SF       400.1300139 MHz
WDW      EM
SSB      0
LB       0 Hz
GB       0
PC       1.00
    
```

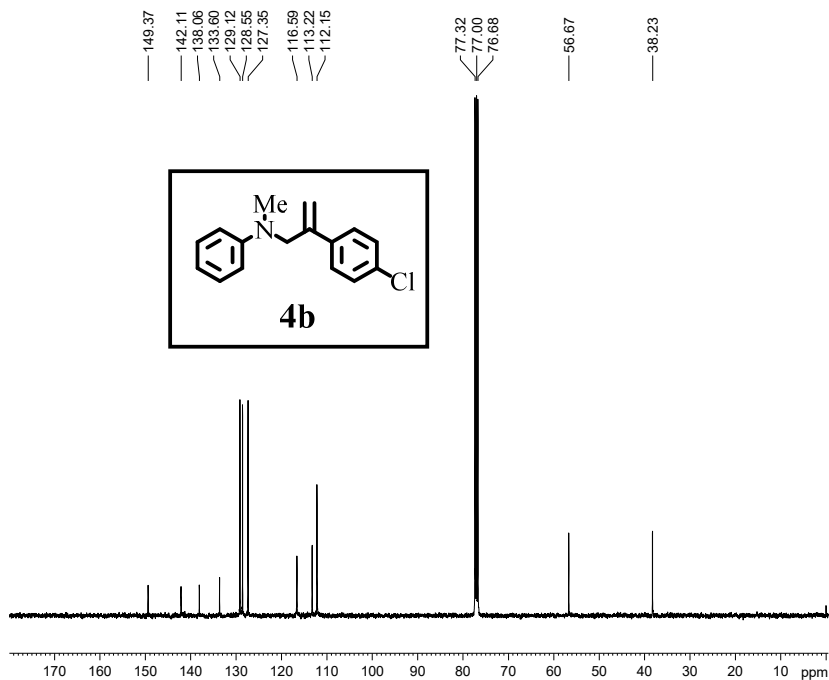

```

Current Data Parameters
NAME      3F NMR
EXPNO    1154
PROCNO   1

F2 - Acquisition Parameters
Date_    20230608
Time     21:12
INSTRUM  spect
PROBHD   5 mm PABBO BB/
PULPROG  zgpg30
TD       32768
SOLVENT  CDCl3
NS       866
DS       0
SWH      24038.461 Hz
FIDRES   0.733596 Hz
AQ       0.6815744 sec
RG       198.09
DW       20.800 usec
DE       6.50 usec
TE       299.5 K
D1       2.0000000 sec
D11     0.03000000 sec
TD0      1

===== CHANNEL f1 =====
SFO1    100.6228298 MHz
NUC1     13C
P1       10.00 usec
PLW1    49.50000000 W

===== CHANNEL f2 =====
SFO2    400.1316008 MHz
NUC2     1H
CPDPRG2  waltz16
PCPD2    90.00 usec
PLW2    12.50000000 W
PLW12   0.34720000 W
PLW13   0.28125000 W

F2 - Processing parameters
SI       32768
SF       100.6127710 MHz
WDW      EM
SSB      0
LB       2.00 Hz
GB       0
PC       1.00
    
```

# <sup>1</sup>H and <sup>13</sup>C NMR spectra of compound 4c.

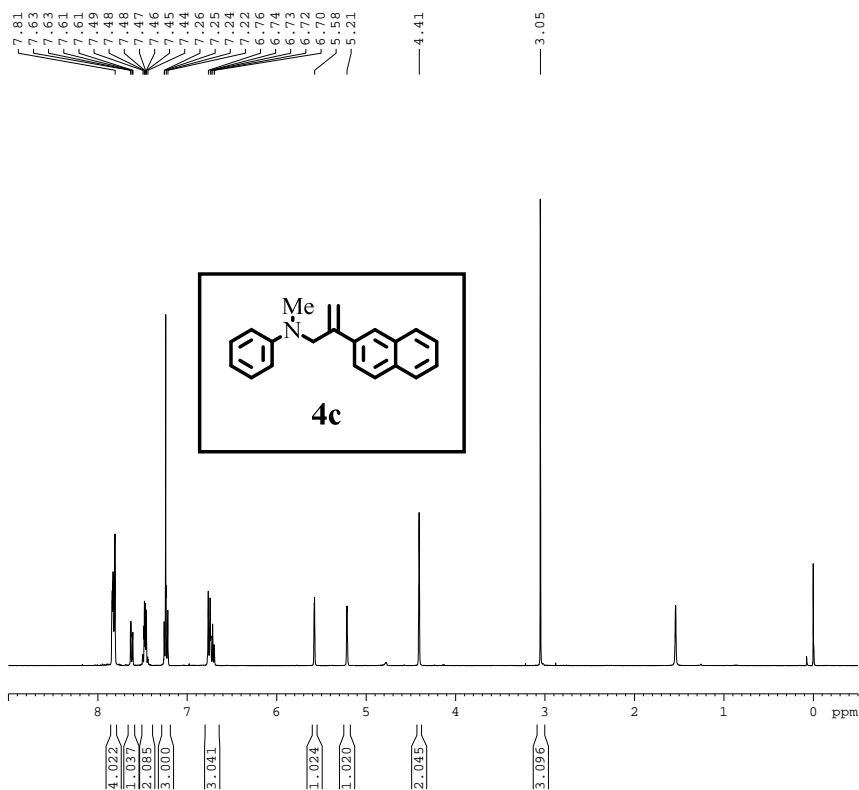

```

Current Data Parameters
NAME      3F NMR
EXPNO    1165
PROCNO   1

F2 - Acquisition Parameters
Date_    20230611
Time     5.41
INSTRUM  spect
PROBHD   5 mm PABBO BB/
PULPROG  zg30
TD        32768
SOLVENT  CDCl3
NS        0
DS        0
SWH       7211.539 Hz
FIDRES    0.220079 Hz
AQ         2.271947 sec
RG         113.31
DW         69.333 usec
DE         10.06 usec
TE         298.6 K
D1         2.0000000 sec
TD0        1

===== CHANNEL f1 =====
SFO1     400.1324008 MHz
NUC1      1H
P1        15.00 usec
PLW1     13.50000000 W

F2 - Processing parameters
SI         16384
SF         400.1300175 MHz
WDW        EM
SSB         0
LB           0 Hz
GB           0
PC          1.00
    
```

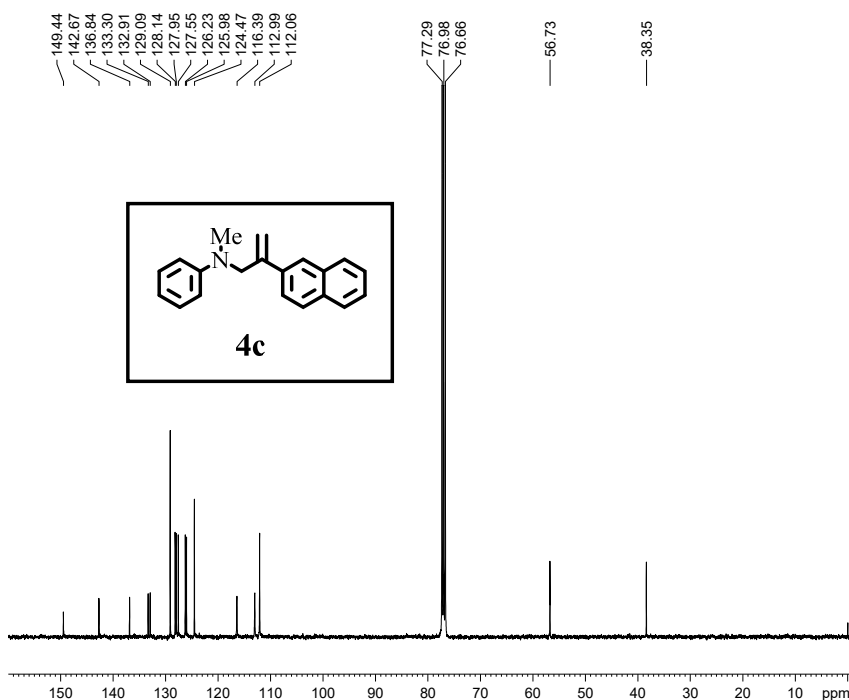

```

Current Data Parameters
NAME      3F NMR
EXPNO    1166
PROCNO   1

F2 - Acquisition Parameters
Date_    20230611
Time     5.43
INSTRUM  spect
PROBHD   5 mm PABBO BB/
PULPROG  zgpg30
TD        32768
SOLVENT  CDCl3
NS        0
DS        0
SWH       24038.461 Hz
FIDRES    0.733596 Hz
AQ         0.6815744 sec
RG         198.09
DW         20.800 usec
DE         6.50 usec
TE         298.7 K
D1         2.0000000 sec
D11        0.03000000 sec
TD0        1

===== CHANNEL f1 =====
SFO1     100.6228298 MHz
NUC1      13C
P1        10.00 usec
PLW1     49.50000000 W

===== CHANNEL f2 =====
SFO2     400.1316005 MHz
NUC2      1H
CPDPRG2  waltz16
PCPD2    90.00 usec
PLW2     12.50000000 W
PLW12    0.34722000 W
PLW13    0.28125000 W

F2 - Processing parameters
SI         32768
SF         100.6127734 MHz
WDW        EM
SSB         0
LB          2.00 Hz
GB           0
PC          1.00
    
```

# <sup>1</sup>H and <sup>13</sup>C NMR spectra of compound 4d.

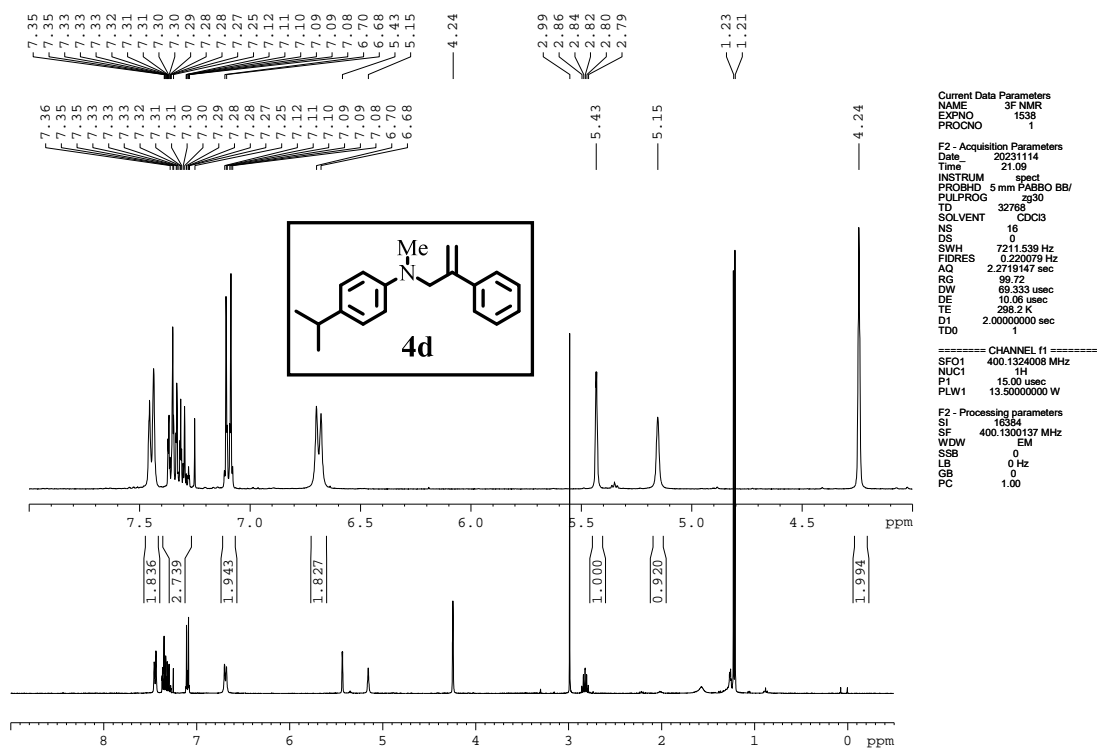

```

Current Data Parameters
NAME      3F NMR
EXPNO    1538
PROCNO   1

F2 - Acquisition Parameters
Date_    20231114
Time     21.09
INSTRUM  spect
PROBHD   5 mm PABBO BB/
PULPROG  zg30
SOLVENT  CDCl3
NS       16
DS       0
SWH      7211539 Hz
FIDRES   0.220079 Hz
AQ       2.2719147 sec
RG       69.72
DW       69.333 usec
DE       10.06 usec
TE       298.2 K
D1       2.0000000 sec
TD0      1

===== CHANNEL f1 =====
SFO1    400.1324008 MHz
NUC1    1H
P1      15.00 usec
PLW1    13.50000000 W

F2 - Processing parameters
SI      16384
SF      400.1300137 MHz
WDW     EM
SSB     0
LB      0 Hz
GB      0
PC      1.00
    
```

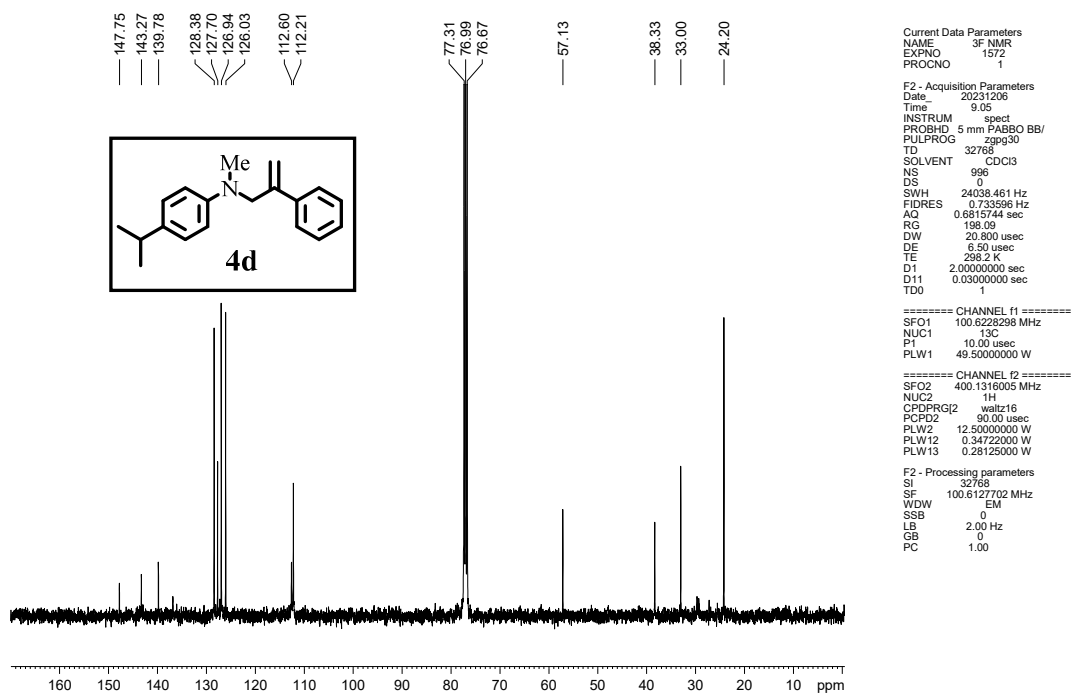

```

Current Data Parameters
NAME      3F NMR
EXPNO    1572
PROCNO   1

F2 - Acquisition Parameters
Date_    20231206
Time     9.05
INSTRUM  spect
PROBHD   5 mm PABBO BB/
PULPROG  zg30
SOLVENT  CDCl3
NS       996
DS       0
SWH      24038461 Hz
FIDRES   0.733596 Hz
AQ       0.6815744 sec
RG       198.09
DW       20.800 usec
DE       6.50 usec
TE       298.2 K
D1       2.0000000 sec
D11     0.03000000 sec
TD0      1

===== CHANNEL f1 =====
SFO1    100.6228298 MHz
NUC1    13C
P1      10.00 usec
PLW1    49.50000000 W

===== CHANNEL f2 =====
SFO2    400.1316005 MHz
NUC2    1H
CPDPRG2  waltz16
PCPD2    90.00 usec
PLW2    12.50000000 W
PLW12   0.34722000 W
PLW13   0.28125000 W

F2 - Processing parameters
SI      32768
SF      100.6127702 MHz
WDW     EM
SSB     0
LB      2.00 Hz
GB      0
PC      1.00
    
```

# <sup>1</sup>H and <sup>13</sup>C NMR spectra of compound 4e.

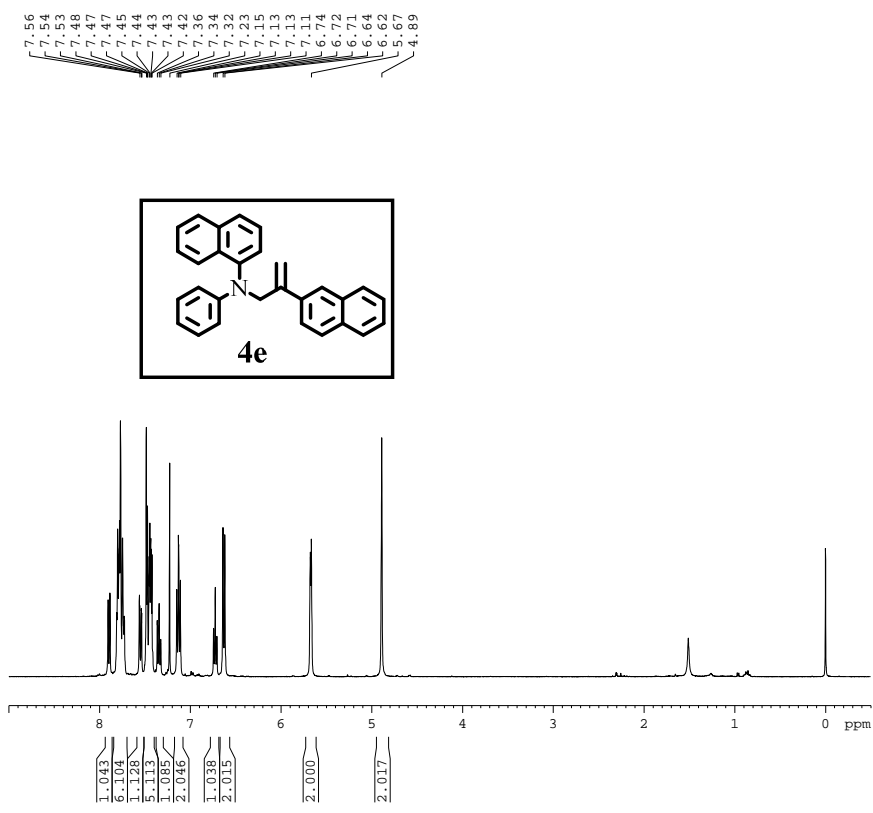

Current Data Parameters  
 NAME 3F NMR  
 EXPNO 1159  
 PROCNO 1

F2 - Acquisition Parameters  
 Date\_ 20230609  
 Time 8.07  
 INSTRUM spect  
 PROBHD 5 mm PABBO BB/  
 PULPROG zg30  
 TD 32768  
 SOLVENT CDCl3  
 NS 16  
 DS 0  
 SWH 7211.539 Hz  
 FIDRES 0.220079 Hz  
 AQ 2.2719147 sec  
 RG 89.08  
 DW 69.333 usec  
 DE 10.36 usec  
 TE 298.9 K  
 D1 2.0000000 sec  
 TDO 1

===== CHANNEL f1 =====  
 SFO1 400.1324008 MHz  
 NUC1 1H  
 P1 15.00 usec  
 PLW1 13.5000000 W

F2 - Processing parameters  
 SI 6384  
 SF 400.1300232 MHz  
 WDW EM  
 SSB 0  
 LB 0 Hz  
 GB 0  
 PC 1.00

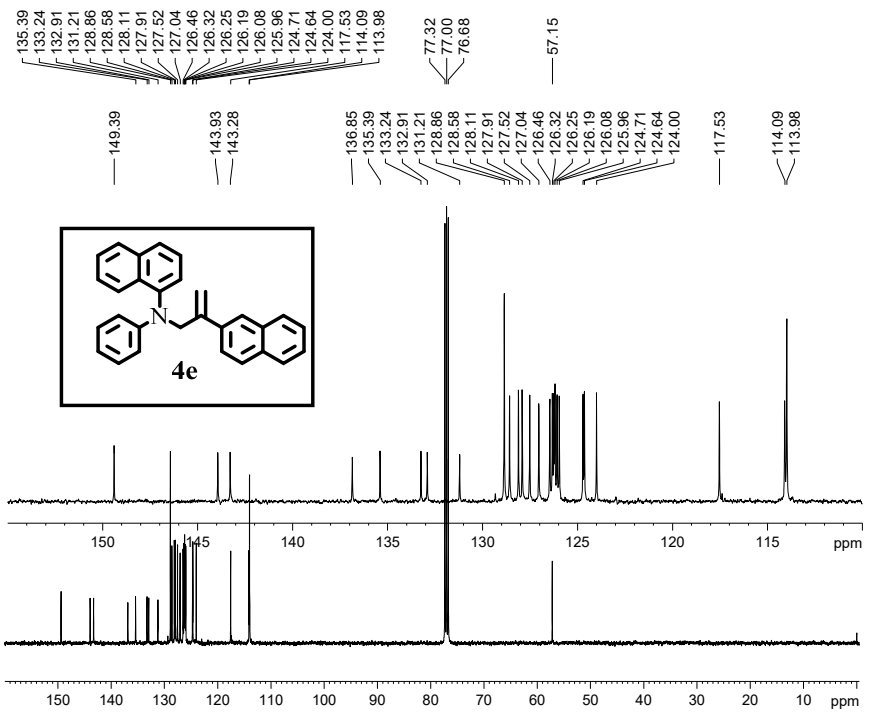

Current Data Parameters  
 NAME 3F NMR  
 EXPNO 1162  
 PROCNO 1

F2 - Acquisition Parameters  
 Date\_ 20230810  
 Time 20.24  
 INSTRUM spect  
 PROBHD 5 mm PABBO BB/  
 PULPROG zgpg30  
 TD 32768  
 SOLVENT CDCl3  
 NS 772  
 DS 0  
 SWH 24038.461 Hz  
 FIDRES 0.733596 Hz  
 AQ 0.6815744 sec  
 RG 198.09  
 DW 20.800 usec  
 DE 6.50 usec  
 TE 300.4 K  
 D1 2.0000000 sec  
 D11 0.03000000 sec  
 TDO 1

===== CHANNEL f1 =====  
 SFO1 100.6228298 MHz  
 NUC1 13C  
 P1 10.00 usec  
 PLW1 49.5000000 W

===== CHANNEL f2 =====  
 SFO2 400.1316005 MHz  
 NUC2 1H  
 CPDPRG2 waltz16  
 PCPD2 90.00 usec  
 PLW2 12.5000000 W  
 PLW12 0.3472000 W  
 PLW13 0.28125000 W

F2 - Processing parameters  
 SI 32768  
 SF 100.6127731 MHz  
 WDW EM  
 SSB 0  
 LB 2.00 Hz  
 GB 0  
 PC 1.00

# <sup>1</sup>H and <sup>13</sup>C NMR spectra of compound 5a.

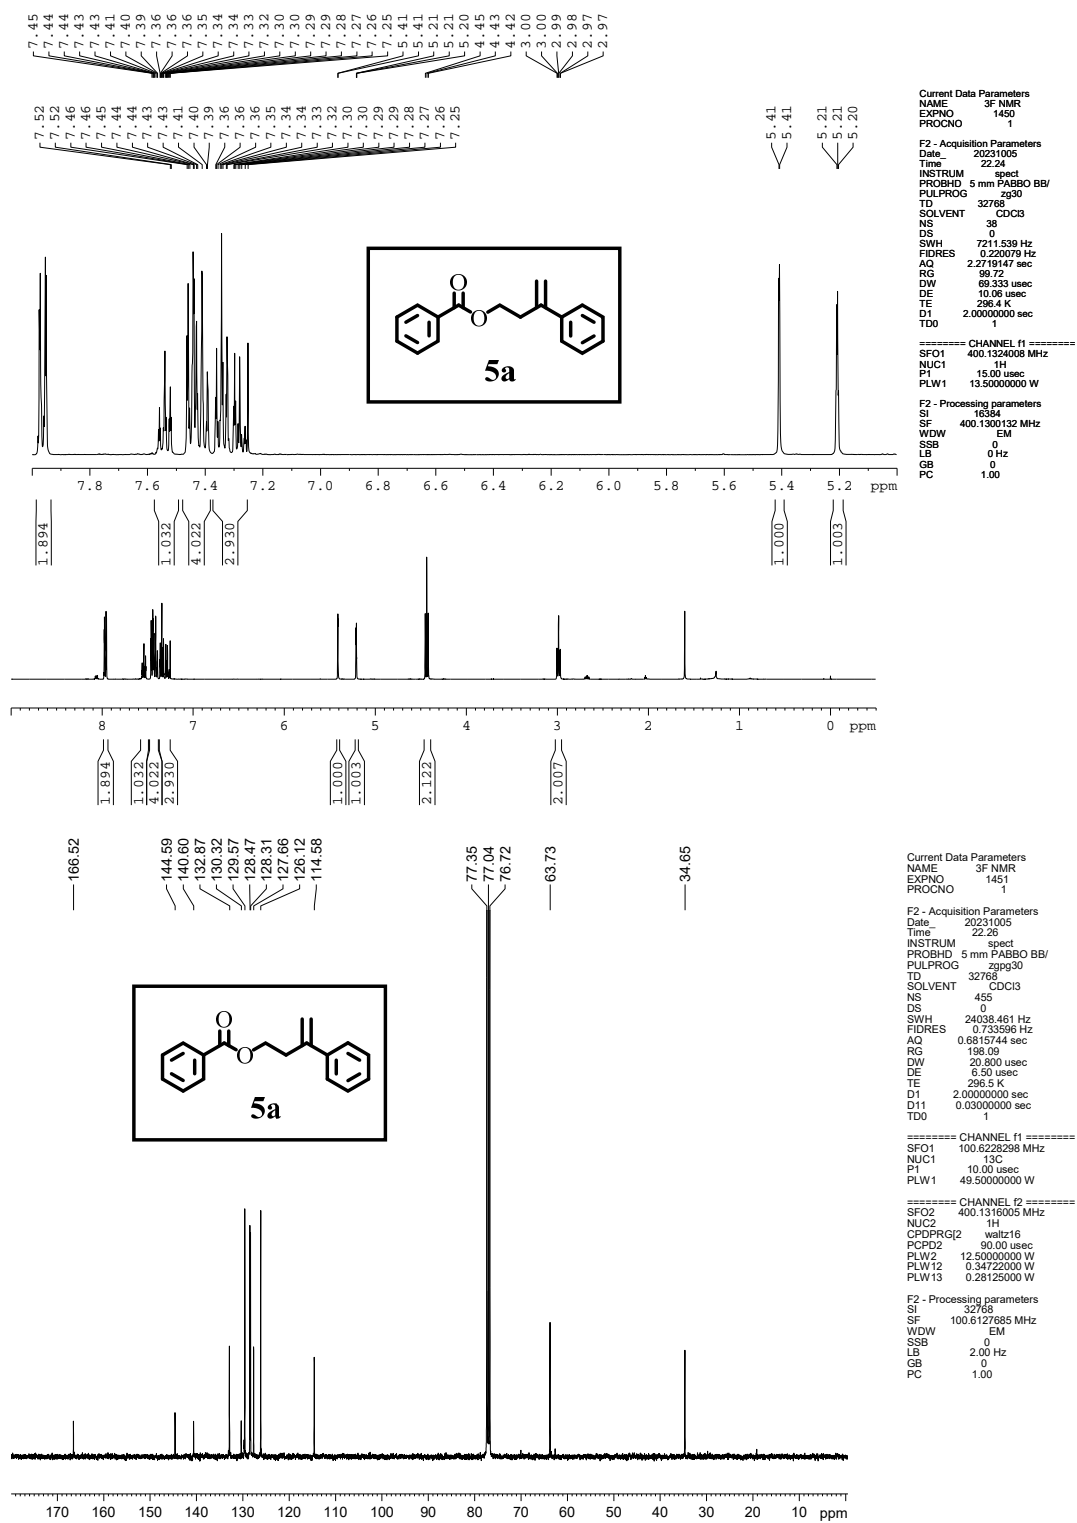

# <sup>1</sup>H and <sup>13</sup>C NMR spectra of compound 5b.

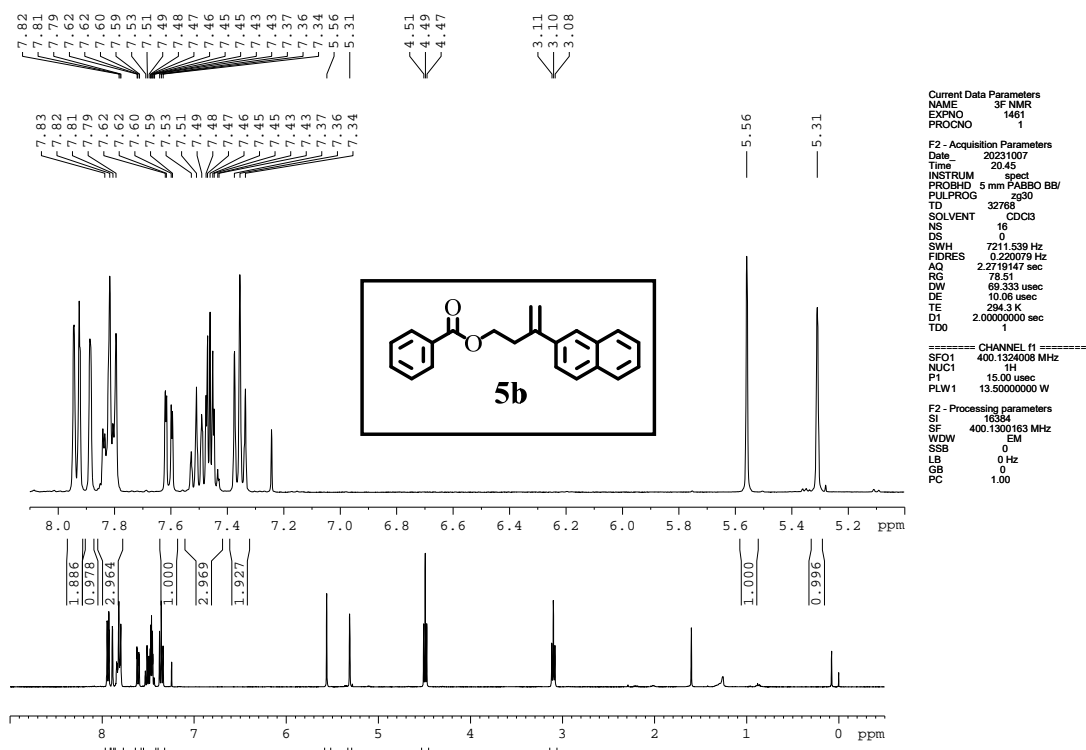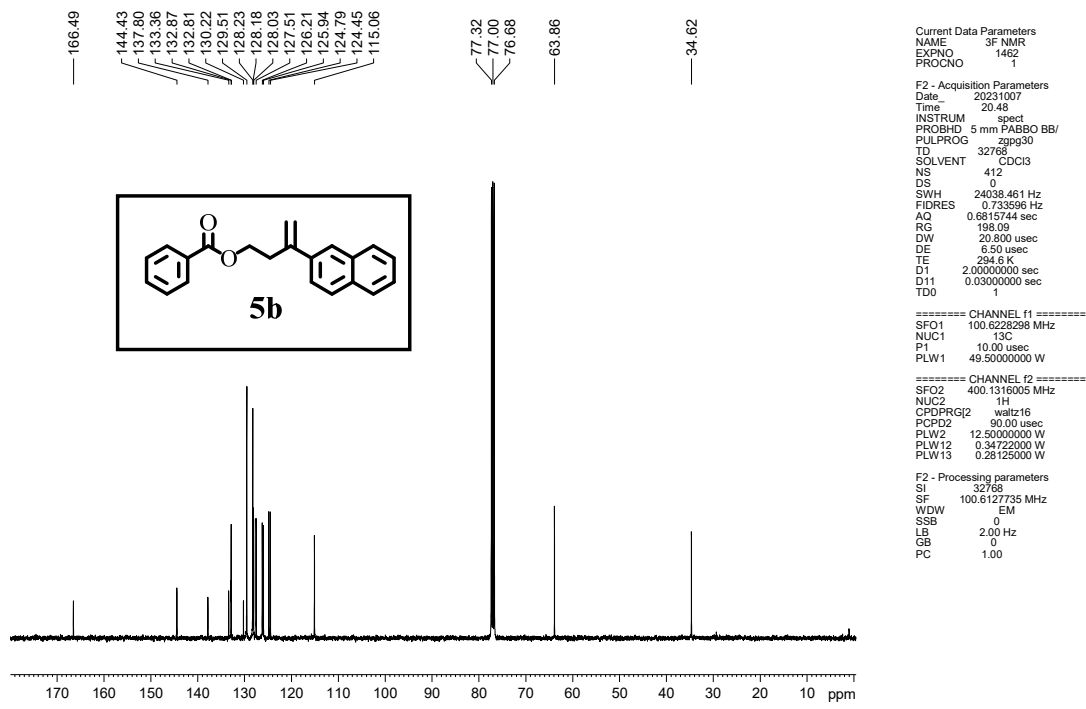

<sup>1</sup>H and <sup>13</sup>C NMR spectra of compound 5c.

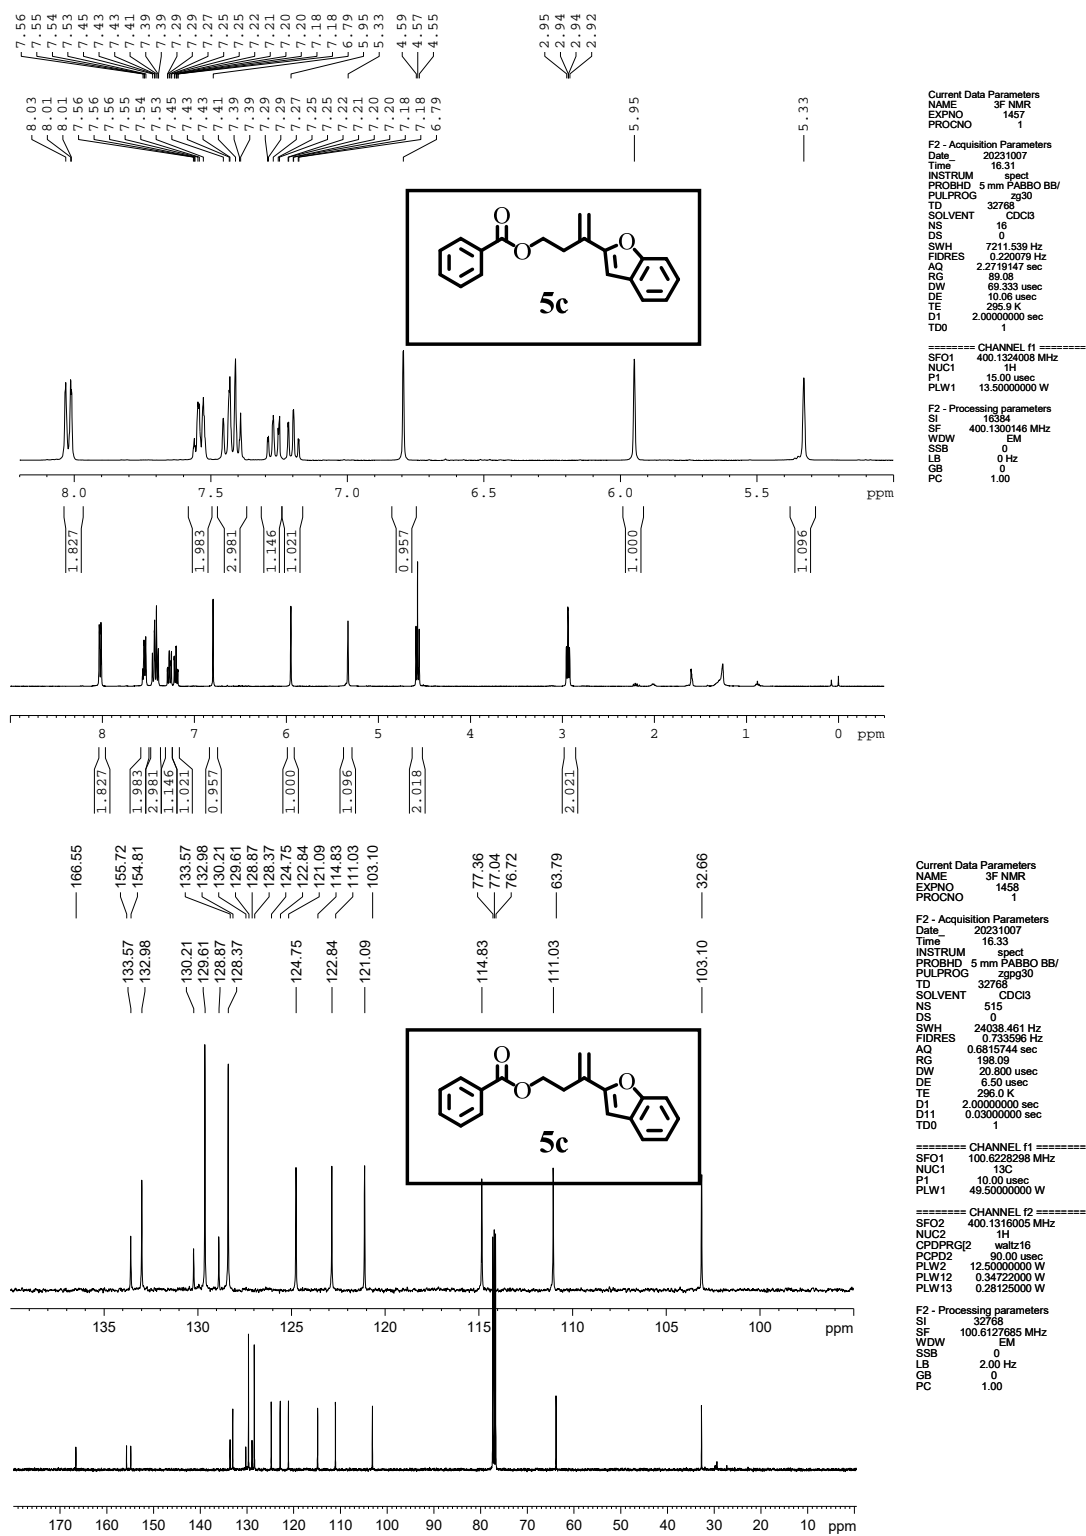

# <sup>1</sup>H and <sup>13</sup>C NMR spectra of compound 5d.

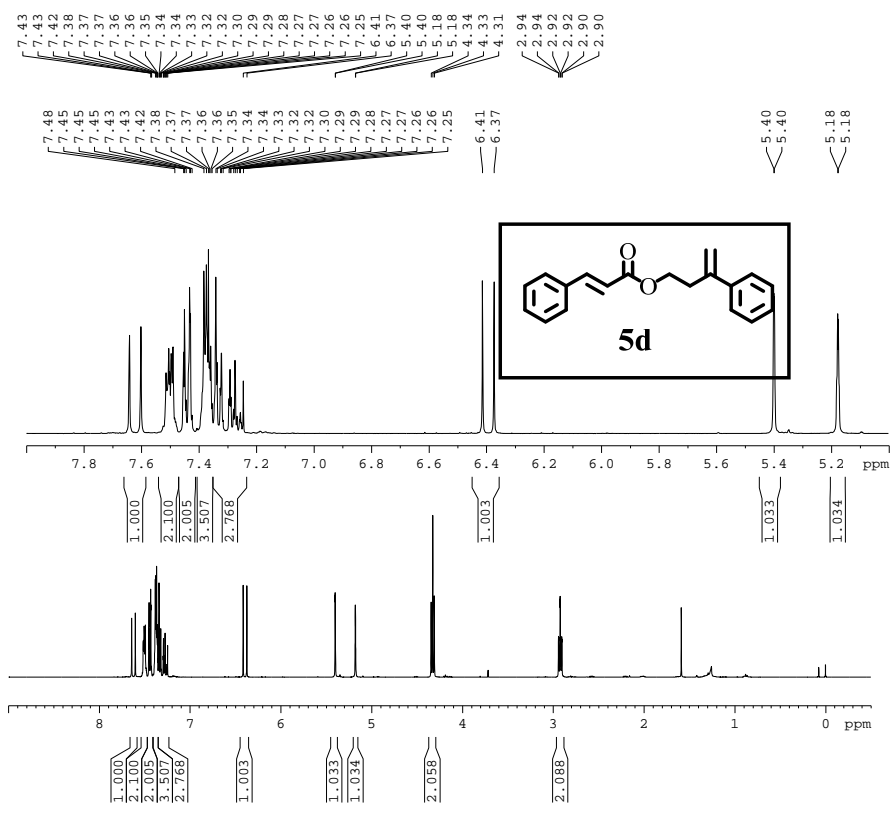

Current Data Parameters  
 NAME 3F NMR  
 EXPNO 1503  
 PROCNO 1

F2 - Acquisition Parameters  
 Date\_ 20231021  
 Time 21.59  
 INSTRUM spect  
 PROBHD 5 mm PABBO BB/  
 PULPROG zg30  
 TD 32768  
 SOLVENT CDCl3  
 NS 16  
 DS 0  
 SWH 7211.539 Hz  
 FIDRES 0.220079 Hz  
 AQ 2.2719147 sec  
 RG 78.51  
 DW 68.333 usec  
 DE 10.36 usec  
 TE 299.3 K  
 D1 2.0000000 sec  
 TDO

===== CHANNEL f1 =====  
 SFO1 400.1324008 MHz  
 NUC1 1H  
 P1 15.00 usec  
 PLW1 13.5000000 W

F2 - Processing parameters  
 SI 6384  
 SE 400.1303154 MHz  
 WDW EM  
 SSB 0  
 GB 0  
 PC 1.00

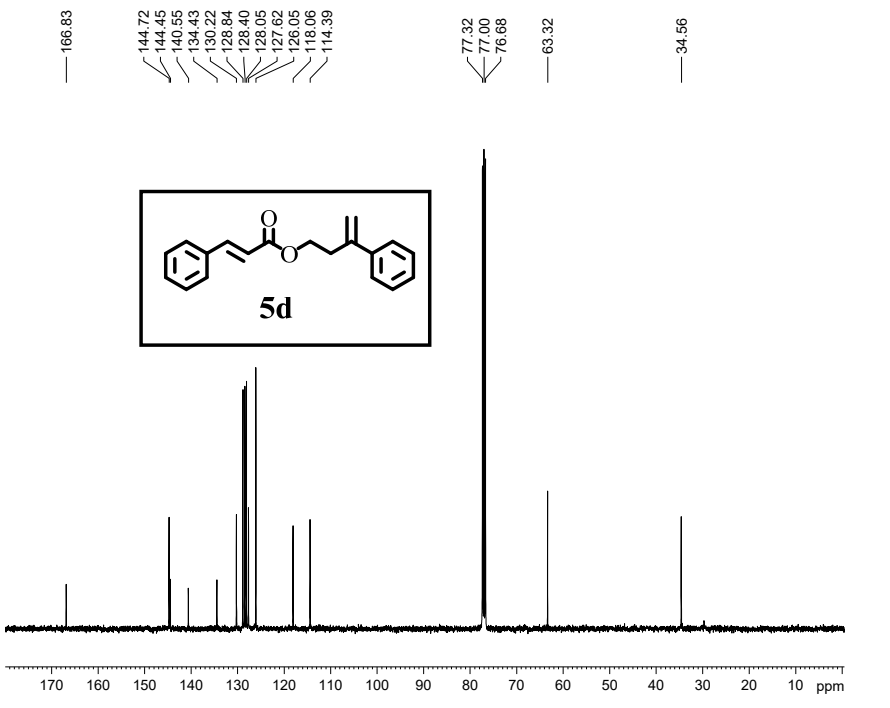

Current Data Parameters  
 NAME 3F NMR  
 EXPNO 1504  
 PROCNO 1

F2 - Acquisition Parameters  
 Date\_ 20231021  
 Time 22.02  
 INSTRUM spect  
 PROBHD 5 mm PABBO BB/  
 PULPROG zgpg30  
 TD 32768  
 SOLVENT CDCl3  
 NS 285  
 DS 0  
 SWH 24038.461 Hz  
 FIDRES 0.733596 Hz  
 AQ 0.6815744 sec  
 RG 158.09  
 DW 20.800 usec  
 DE 6.50 usec  
 TE 299.5 K  
 D1 2.0000000 sec  
 D11 0.0300000 sec  
 TDO 1

===== CHANNEL f1 =====  
 SFO1 100.6228298 MHz  
 NUC1 13C  
 P1 10.00 usec  
 PLW1 49.5000000 W

===== CHANNEL f2 =====  
 SFO2 400.1316005 MHz  
 NUC2 1H  
 CPDPRG2 waltz16  
 PCPD2 90.00 usec  
 PLW12 12.5000000 W  
 PLW13 0.3472200 W  
 PLW13 0.28125000 W

F2 - Processing parameters  
 SI 32768  
 SF 100.612726 MHz  
 WDW EM  
 SSB 0  
 LB 2.00 Hz  
 GB 0  
 PC 1.00



<sup>1</sup>H and <sup>13</sup>C NMR spectra of compound 5e.

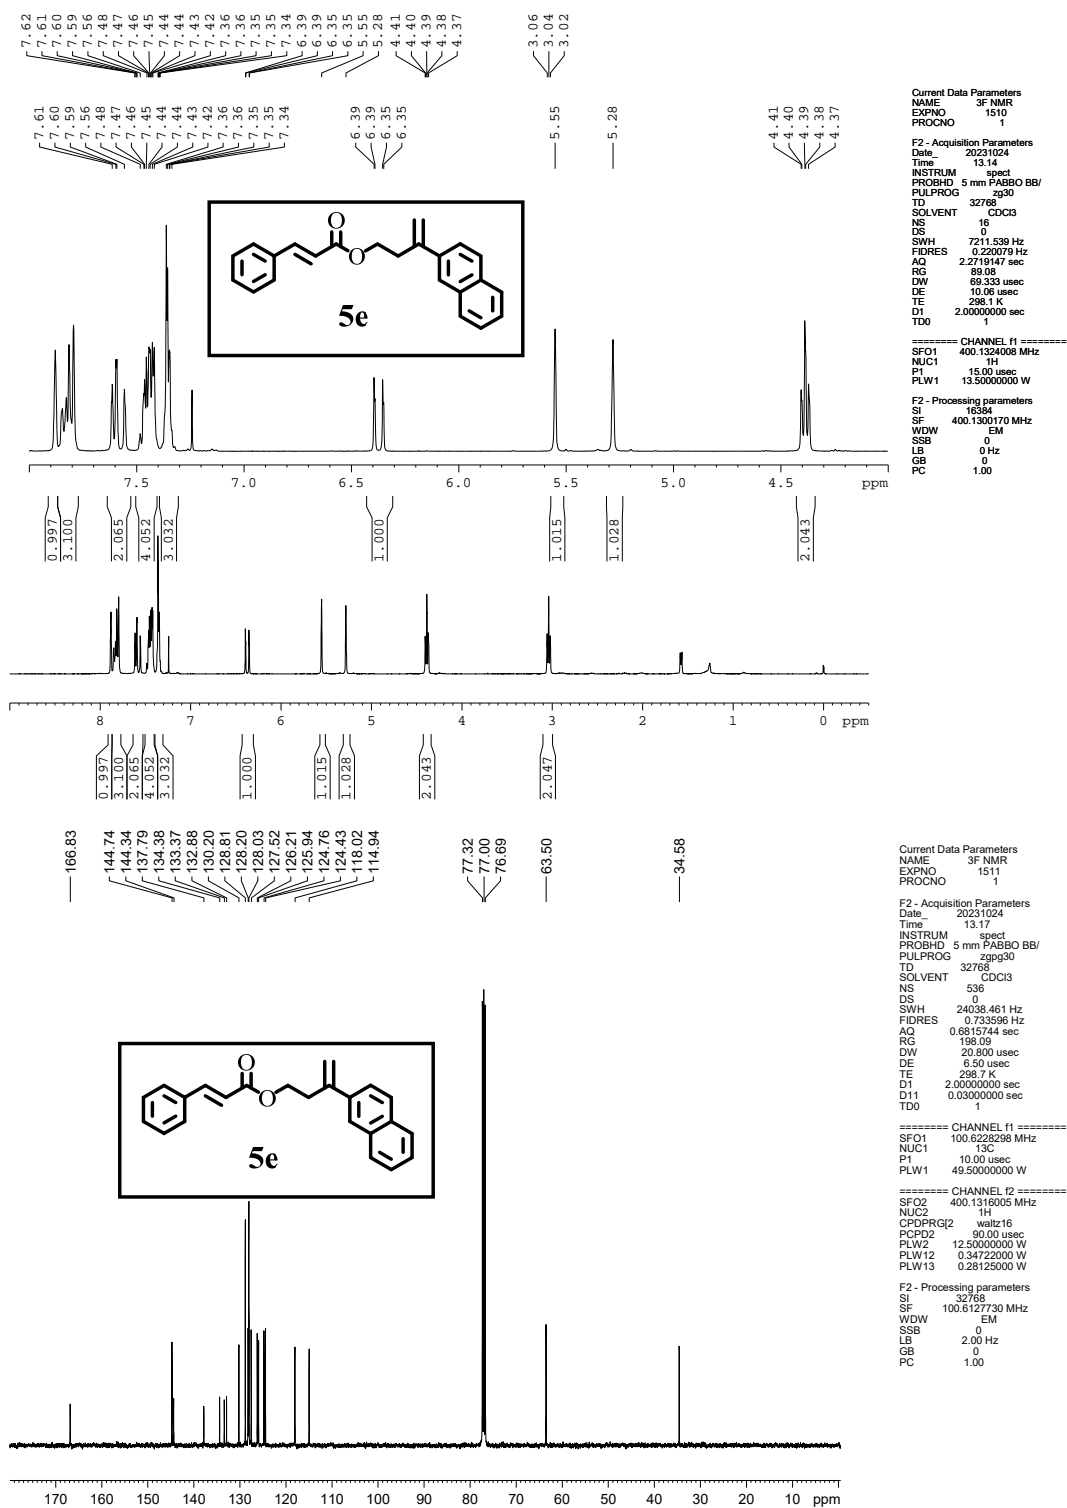

Current Data Parameters  
 NAME 3F NMR  
 EXPNO 1510  
 PROCNO 1

F2 - Acquisition Parameters  
 Date\_ 20231024  
 Time 13.14  
 INSTRUM spect  
 PROBHD 5 mm PABBO BB/  
 PULPROG zg30  
 TD 32768  
 SOLVENT CDCl3  
 NS 16  
 DS 0  
 SWH 7211.539 Hz  
 FIDRES 0.220079 Hz  
 AQ 2.2719147 sec  
 RG 89.08  
 DW 69.33 usec  
 DE 10.98 usec  
 TE 298.1 K  
 D1 2.0000000 sec  
 TDO

===== CHANNEL f1 =====  
 SFO1 400.1324008 MHz  
 NUC1 1H  
 P1 15.00 usec  
 PLW1 13.5000000 W

F2 - Processing parameters  
 SI 32768  
 SF 400.1300170 MHz  
 WDW EM  
 SSB 0  
 LB 0 Hz  
 GB 0  
 PC 1.00

Current Data Parameters  
 NAME 3F NMR  
 EXPNO 1511  
 PROCNO 1

F2 - Acquisition Parameters  
 Date\_ 20231024  
 Time 13.17  
 INSTRUM spect  
 PROBHD 5 mm PABBO BB/  
 PULPROG zgpg30  
 TD 32768  
 SOLVENT CDCl3  
 NS 536  
 DS 0  
 SWH 24038.461 Hz  
 FIDRES 0.733596 Hz  
 AQ 0.8815744 sec  
 RG 198.09  
 DW 20.800 usec  
 DE 6.50 usec  
 TE 298.7 K  
 D1 2.0000000 sec  
 D11 0.0300000 sec  
 TDO 1

===== CHANNEL f1 =====  
 SFO1 100.6228298 MHz  
 NUC1 13C  
 P1 10.00 usec  
 PLW1 49.5000000 W

===== CHANNEL f2 =====  
 SFO2 400.1316005 MHz  
 NUC2 1H  
 CPDPRG2 waltz16  
 PCPD2 90.00 usec  
 PLW2 12.5000000 W  
 PLW12 0.3472200 W  
 PLW13 0.2812500 W

F2 - Processing parameters  
 SI 32768  
 SF 100.6127730 MHz  
 WDW EM  
 SSB 0  
 LB 2.00 Hz  
 GB 0  
 PC 1.00

**<sup>1</sup>H and <sup>13</sup>C NMR spectra of compound 5f.**

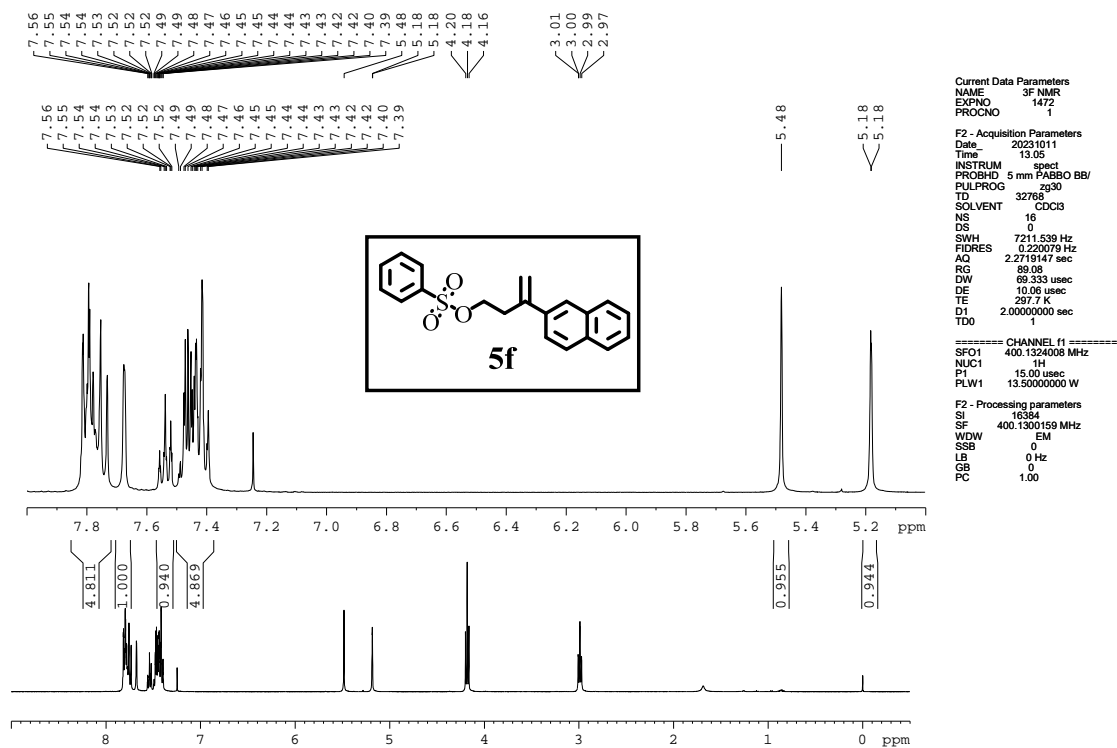

Current Data Parameters  
 NAME 3F NMR  
 EXPNO 1472  
 PROCNO 1  
 F2 - Acquisition Parameters  
 Date\_ 20231011  
 Time 13.05  
 INSTRUM spect  
 PROBHD 5 mm PABBO BB/  
 PULPROG zg30  
 TD 32768  
 SOLVENT CDCl3  
 NS 16  
 DS 0  
 SWH 7211.539 Hz  
 FIDRES 0.220079 Hz  
 AQ 2.271917 sec  
 RG 89.08  
 DW 69.333 usec  
 DE 10.06 usec  
 TE 297.7 K  
 D1 2.0000000 sec  
 TDO 1  
 ===== CHANNEL f1 =====  
 SFO1 400.1324008 MHz  
 NUC1 <sup>1</sup>H  
 P1 15.00 usec  
 PLW1 13.50000000 W  
 F2 - Processing parameters  
 SI 16384  
 SF 400.1300159 MHz  
 WDW EM  
 SSB 0  
 LB 0 Hz  
 GB 0  
 PC 1.00

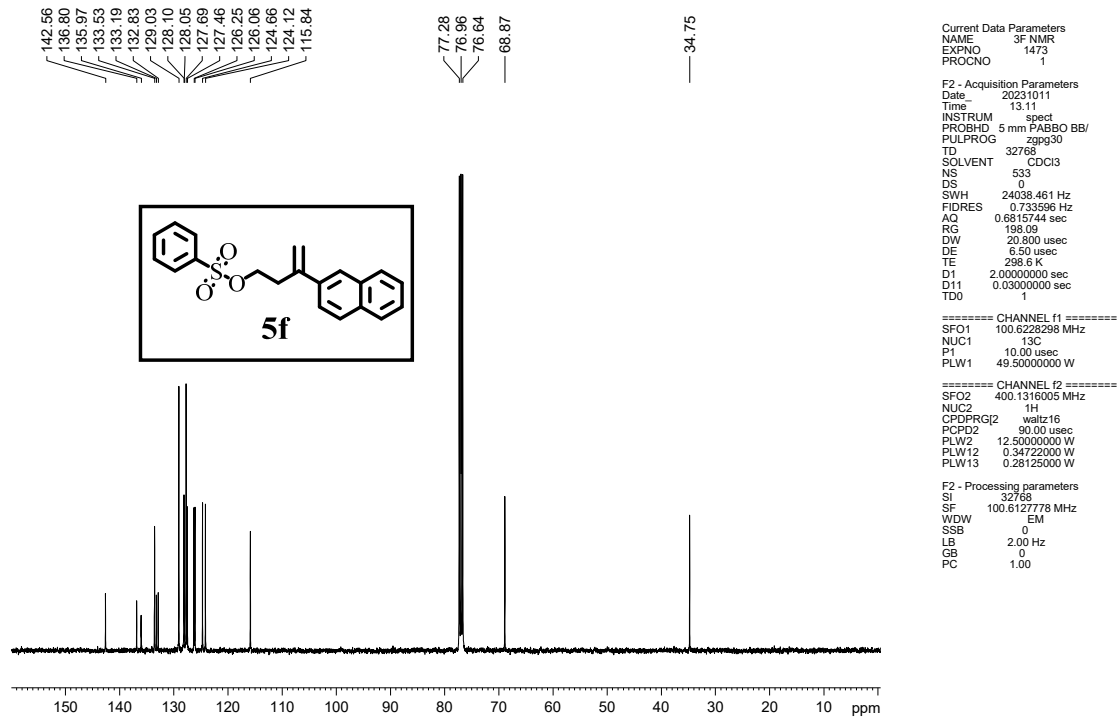

Current Data Parameters  
 NAME 3F NMR  
 EXPNO 1473  
 PROCNO 1  
 F2 - Acquisition Parameters  
 Date\_ 20231011  
 Time 13.11  
 INSTRUM spect  
 PROBHD 5 mm PABBO BB/  
 PULPROG zgpg30  
 TD 32768  
 SOLVENT CDCl3  
 NS 533  
 DS 0  
 SWH 24038.461 Hz  
 FIDRES 0.733596 Hz  
 AQ 0.6815744 sec  
 RG 198.03  
 DW 20.800 usec  
 DE 6.50 usec  
 TE 298.6 K  
 D1 2.0000000 sec  
 D11 0.03000000 sec  
 TDO 1  
 ===== CHANNEL f1 =====  
 SFO1 100.6228298 MHz  
 NUC1 <sup>13</sup>C  
 P1 10.00 usec  
 PLW1 49.50000000 W  
 ===== CHANNEL f2 =====  
 SFO2 400.1316005 MHz  
 NUC2 <sup>1</sup>H  
 CDPFRG2 waltz16  
 PCPD2 90.00 usec  
 PLW2 12.50000000 W  
 PLW12 0.34722000 W  
 PLW13 0.28125000 W  
 F2 - Processing parameters  
 SI 32768  
 SF 100.6127778 MHz  
 WDW EM  
 SSB 0  
 LB 2.00 Hz  
 GB 0  
 PC 1.00

<sup>1</sup>H and <sup>13</sup>C NMR spectra of compound 6a.

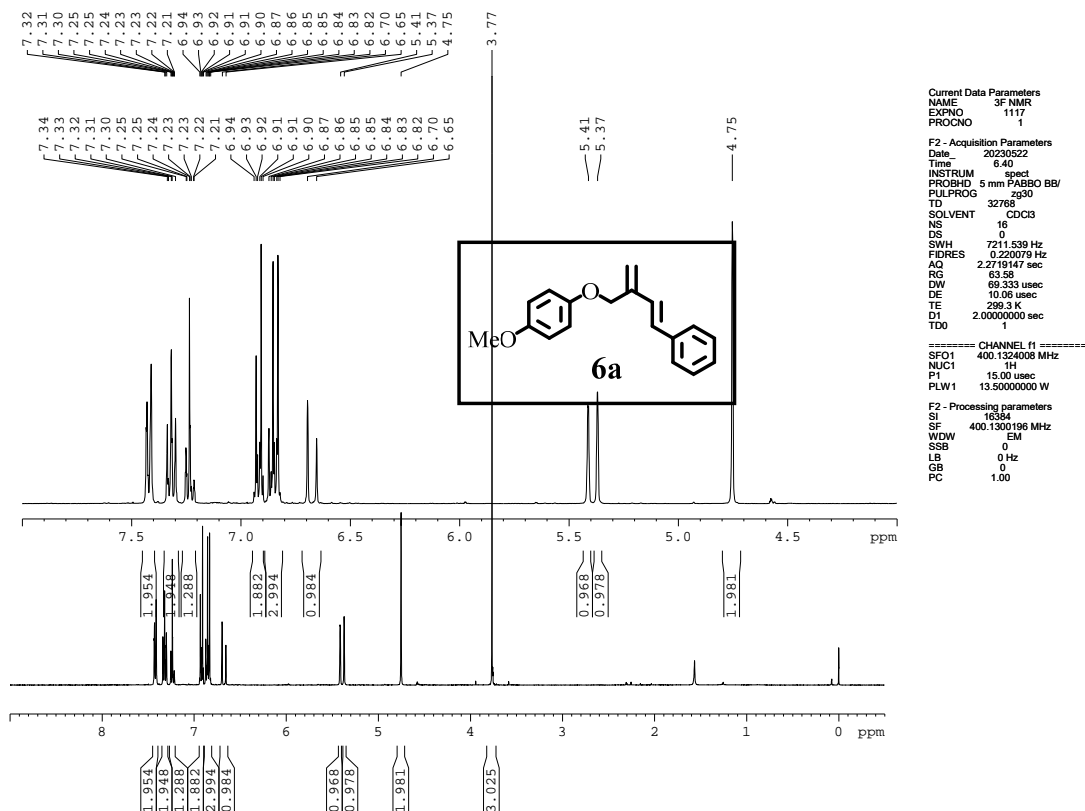

```

Current Data Parameters
NAME 3F NMR
EXPNO 1117
PROCNO 1

F2 - Acquisition Parameters
Date_ 20230522
Time 6.40
INSTRUM spect
PROBHD 5 mm PABBO BB/
PULPROG zgpg30
TD 32768
SOLVENT CDCl3
NS 16
DS 0
SWH 7211.539 Hz
FIDRES 0.220079 Hz
AQ 2.2719147 sec
RG 63.88
DW 68.333 usec
DE 10.06 usec
TE 299.3 K
D1 2.00000000 sec
TD0 1

===== CHANNEL f1 =====
SFO1 400.1324068 MHz
NUC1 1H
P1 15.00 usec
PLW1 13.50000000 W

F2 - Processing parameters
SI 16384
SF 400.1300198 MHz
WDW EM
SSB 0
LB 0 Hz
GB 0
PC 1.00
    
```

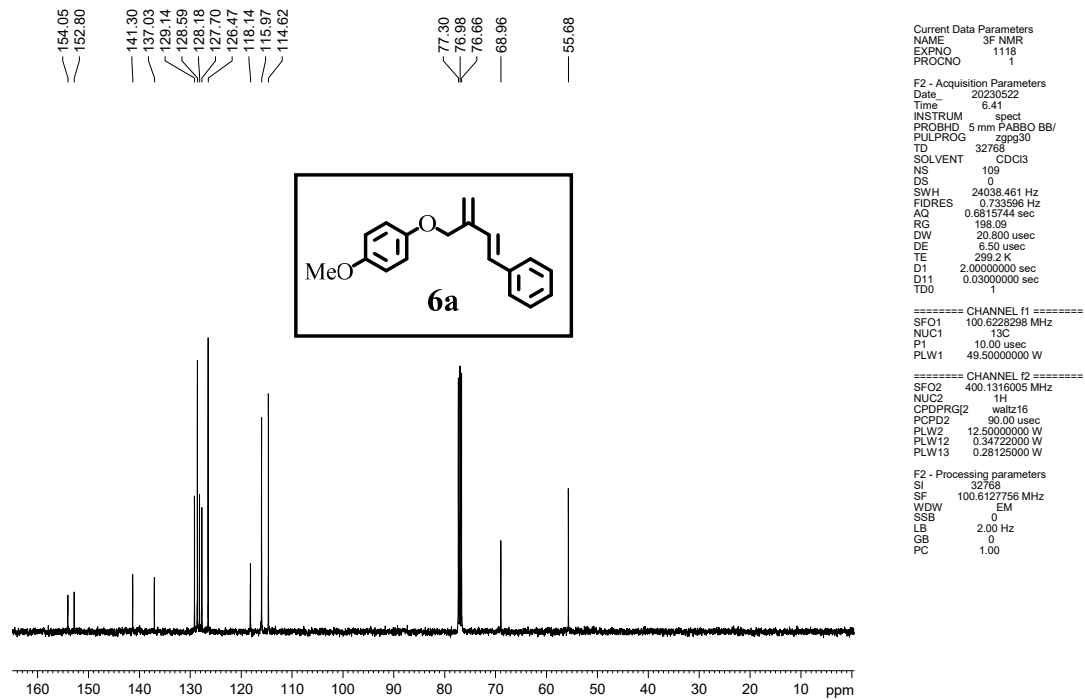

```

Current Data Parameters
NAME 3F NMR
EXPNO 1118
PROCNO 1

F2 - Acquisition Parameters
Date_ 20230522
Time 6.41
INSTRUM spect
PROBHD 5 mm PABBO BB/
PULPROG zgpg30
TD 32768
SOLVENT CDCl3
NS 109
DS 0
SWH 24038.461 Hz
FIDRES 0.733596 Hz
AQ 0.6815744 sec
RG 198.09
DW 20.800 usec
DE 6.50 usec
TE 299.2 K
D1 2.00000000 sec
D11 0.03000000 sec
TD0 1

===== CHANNEL f1 =====
SFO1 100.6226398 MHz
NUC1 13C

===== CHANNEL f2 =====
SFO2 400.1316005 MHz
NUC2 1H
CPDPRG2 waltz16
PCPD2 90.00 usec
PLW2 12.50000000 W
PLW12 0.34722000 W
PLW13 0.28125000 W

F2 - Processing parameters
SI 32768
SF 100.6127756 MHz
WDW EM
SSB 0
LB 2.00 Hz
GB 0
PC 1.00
    
```

<sup>1</sup>H and <sup>13</sup>C NMR spectra of compound 6b.

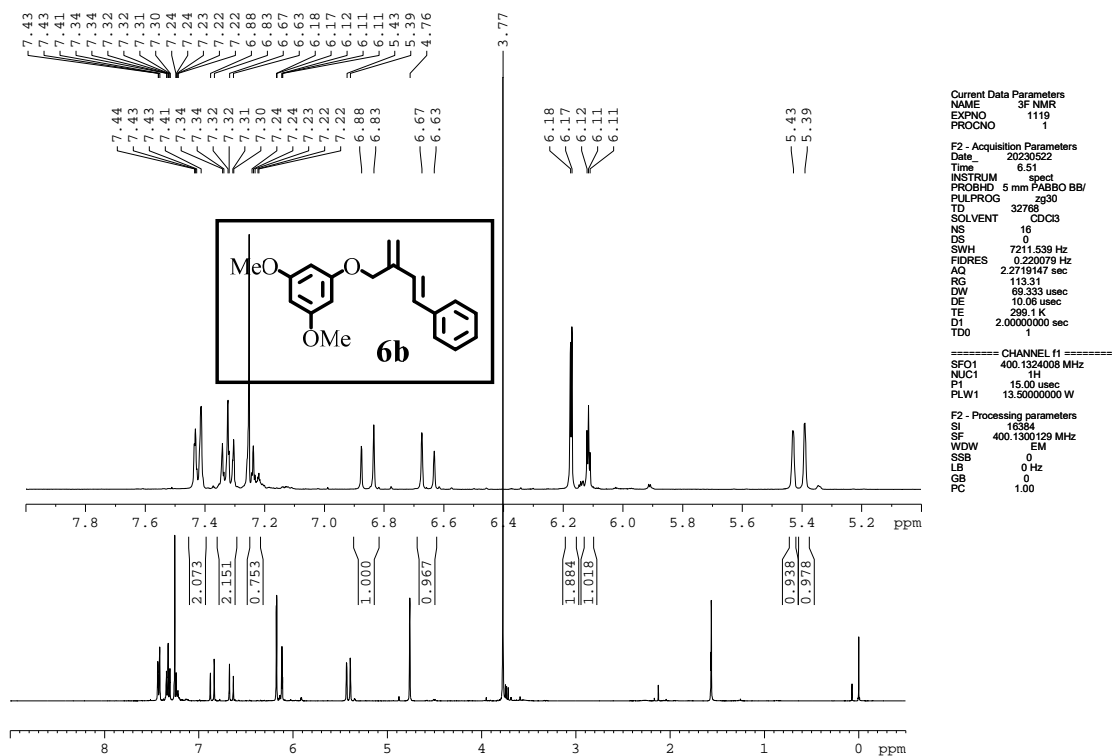

```
Current Data Parameters
NAME      3F NMR
EXPNO    1119
PROCNO   1

F2 - Acquisition Parameters
Date_    20230522
Time     6.51
INSTRUM  spect
PROBHD   5 mm PABBO BB/
PULPROG  zg30
TD        32768
SOLVENT  CDCl3
NS        16
DS        0
SWH       721.539 Hz
FIDRES    0.220079 Hz
AQ        2.2719147 sec
RG        113.31
DW        89.333 usec
DE        10.06 usec
TE        298.1 K
D1        2.0000000 sec
TD0       1

===== CHANNEL f1 =====
SFO1     400.132408 MHz
NUC1     1H
P1       15.00 usec
PLW1     13.5000000 W

F2 - Processing parameters
SI       16384
SF       400.1300129 MHz
WDW      EM
SSB      0
LB       0 Hz
GB       0
PC       1.00
```

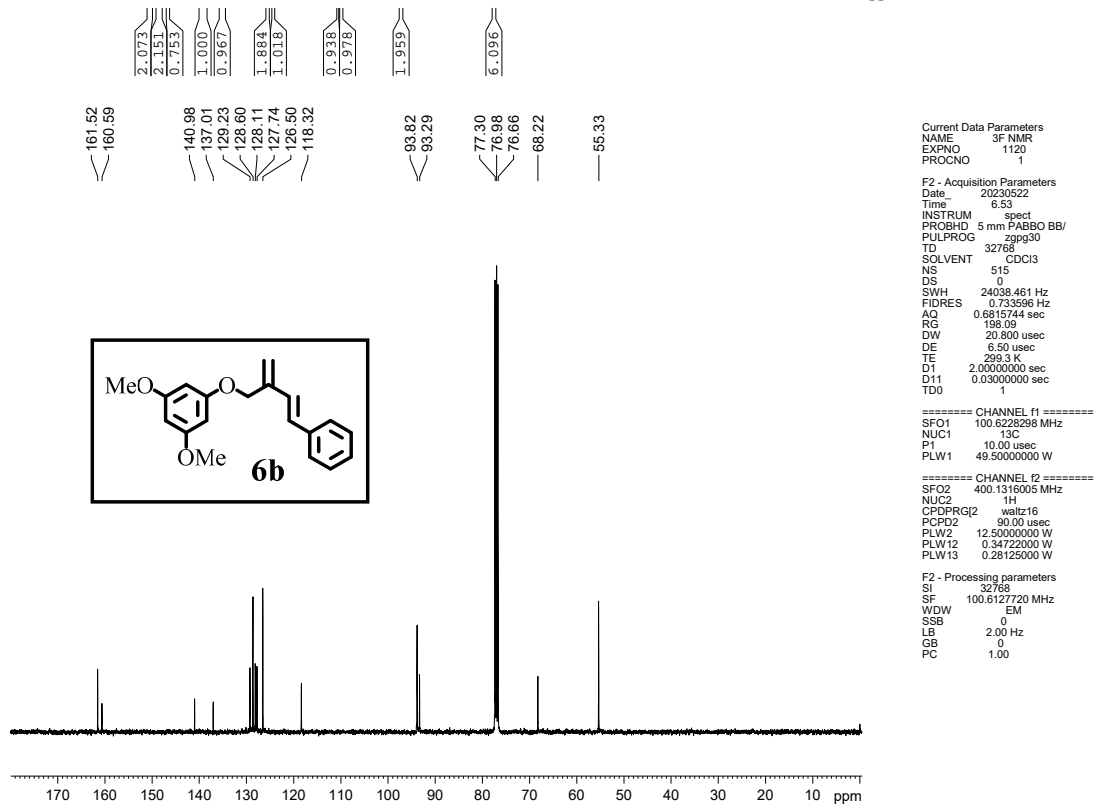

```
Current Data Parameters
NAME      3F NMR
EXPNO    1120
PROCNO   1

F2 - Acquisition Parameters
Date_    20230522
Time     6.53
INSTRUM  spect
PROBHD   5 mm PABBO BB/
PULPROG  zgpg30
TD        32768
SOLVENT  CDCl3
NS        515
DS        0
SWH       24038.461 Hz
FIDRES    0.733596 Hz
AQ        0.6815744 sec
RG        196.09
DW        20.800 usec
DE        6.50 usec
TE        298.3 K
D1        2.0000000 sec
D11      0.0300000 sec
TD0       1

===== CHANNEL f1 =====
SFO1     100.6228298 MHz
NUC1     13C
P1       10.00 usec
PLW1     49.5000000 W

===== CHANNEL f2 =====
SFO2     400.1316005 MHz
NUC2     1H
CPDPRG2  waltz16
PCPD2    90.00 usec
PLW2    12.5000000 W
PLW12   0.34722000 W
PLW13   0.28125000 W

F2 - Processing parameters
SI       32768
SF       100.6127720 MHz
WDW      EM
SSB      0
LB       2.00 Hz
GB       0
PC       1.00
```

# <sup>1</sup>H and <sup>13</sup>C NMR spectra of compound 6c.

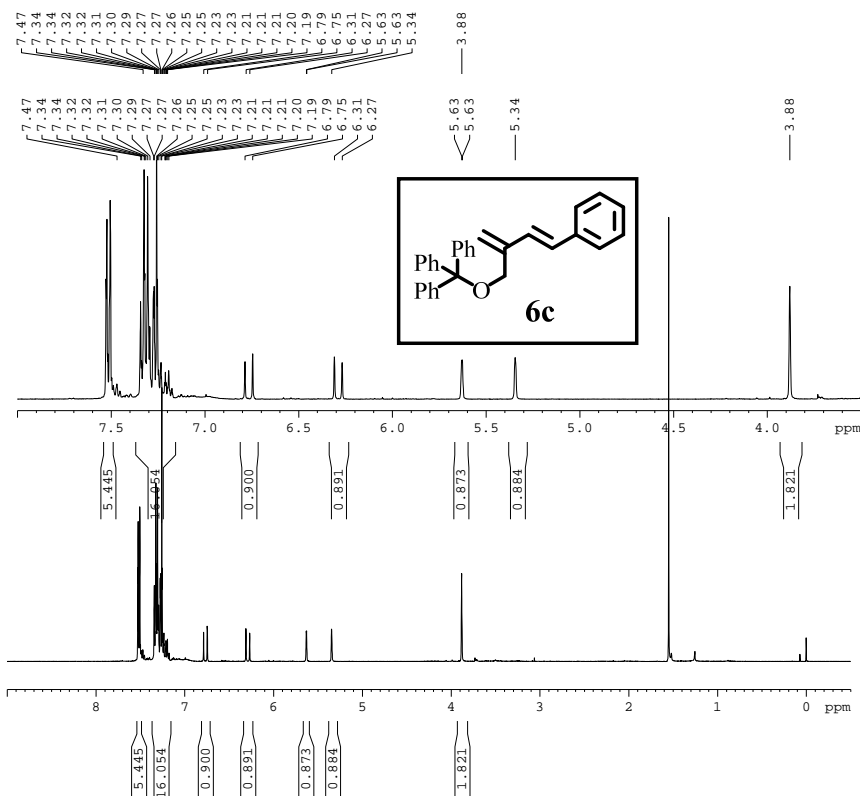

Current Data Parameters  
 NAME 3F NMR  
 EXPNO 1438  
 PROCNO 1

F2 - Acquisition Parameters  
 Date 20231003  
 Time 9.38  
 INSTRUM spect  
 PROBHD 5 mm PABBO BB/  
 PULPROG zg30  
 TD 32768  
 SOLVENT CDCl3  
 NS 109  
 DS 0  
 SWH 7211.539 Hz  
 FIDRES 0.220079 Hz  
 AQ 2.2719147 sec  
 RG 158.74  
 DW 89.333 usec  
 DE 10.06 usec  
 TE 296.6 K  
 D1 2.0000000 sec  
 TDO 1

===== CHANNEL f1 =====  
 SFO1 400.1324008 MHz  
 NUC1 1H  
 P1 15.00 usec  
 PLW1 13.5000000 W

F2 - Processing parameters  
 SI 16384  
 SF 400.1300106 MHz  
 WDW EM  
 SSB 0  
 LB 0 Hz  
 GB 0  
 PC 1.00

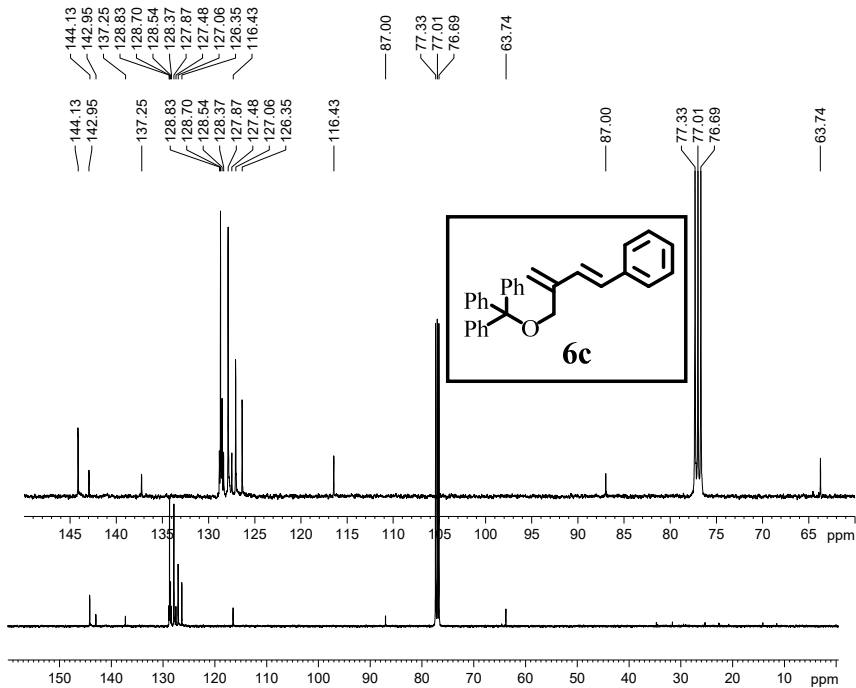

Current Data Parameters  
 NAME 3F NMR  
 EXPNO 1429  
 PROCNO 1

F2 - Acquisition Parameters  
 Date 20230930  
 Time 18.56  
 INSTRUM spect  
 PROBHD 5 mm PABBO BB/  
 PULPROG zgpg30  
 TD 32768  
 SOLVENT CDCl3  
 NS 1457  
 DS 0  
 SWH 24038.461 Hz  
 FIDRES 0.733696 Hz  
 AQ 0.6815744 sec  
 RG 198.09  
 DW 20.800 usec  
 DE 6.50 usec  
 TE 298.2 K  
 D1 2.0000000 sec  
 D11 0.0300000 sec  
 TDO 1

===== CHANNEL f1 =====  
 SFO1 100.6228298 MHz  
 NUC1 13C  
 P1 10.00 usec  
 PLW1 49.5000000 W

===== CHANNEL f2 =====  
 SFO2 400.1316005 MHz  
 NUC2 1H  
 CPDPRG2 waltz16  
 PCPD2 90.00 usec  
 PLW2 12.5000000 W  
 PLW12 0.3472200 W  
 PLW13 0.2812500 W

F2 - Processing parameters  
 SI 32768  
 SF 100.6127685 MHz  
 WDW EM  
 SSB 0  
 LB 2.00 Hz  
 GB 0  
 PC 1.00

<sup>1</sup>H and <sup>13</sup>C NMR spectra of compound 6d.

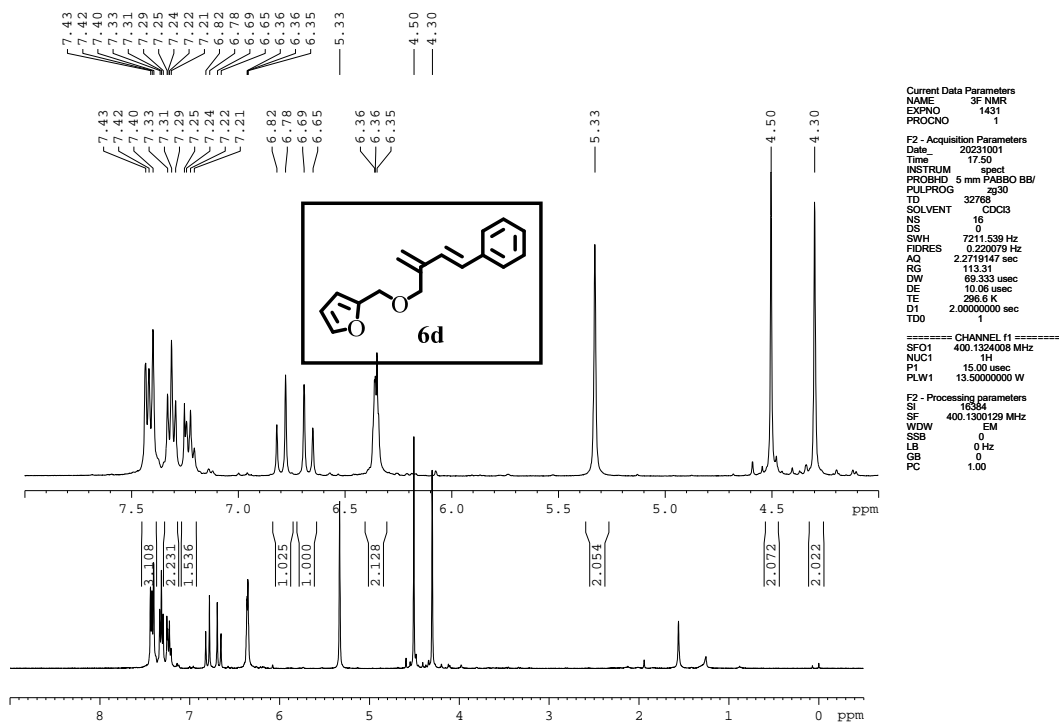

```

Current Data Parameters
NAME      3F NMR
EXPNO    1431
PROCNO   1

F2 - Acquisition Parameters
Date_    20231001
Time     17.50
INSTRUM  spect
PROBHD   5 mm PABBO BB/
PULPROG  zg30
TD       32768
SOLVENT  CDCl3
NS       0
DS       0
SWH      7211.539 Hz
FIDRES   0.220079 Hz
AQ       2.2719147 sec
RG       113.31
DW       68.333 usec
DE       10.06 usec
TE       296.6 K
D1       2.0000000 sec
TDO      1

===== CHANNEL f1 =====
SFO1    400.1324008 MHz
NUC1     1H
P1      15.00 usec
PLW1    13.5000000 W

F2 - Processing parameters
SI      16384
SF      400.1300129 MHz
WDW     EM
SSB     0
LB      0 Hz
GB      0
PC      1.00
    
```

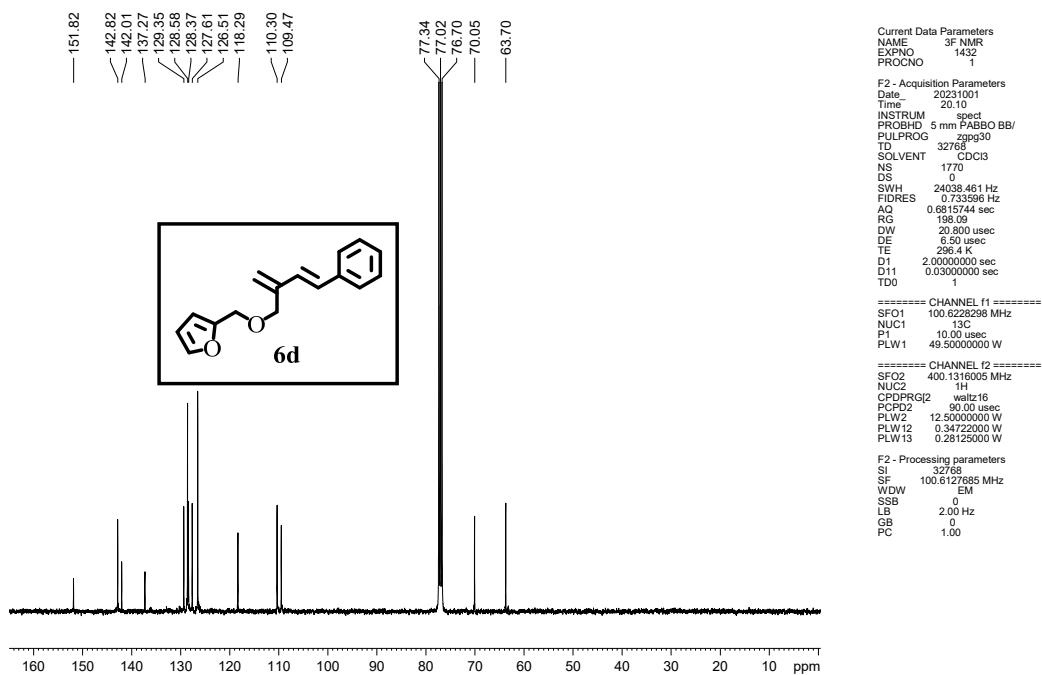

```

Current Data Parameters
NAME      3F NMR
EXPNO    1432
PROCNO   1

F2 - Acquisition Parameters
Date_    20231001
Time     20.10
INSTRUM  spect
PROBHD   5 mm PABBO BB/
PULPROG  zgpg30
TD       32768
SOLVENT  CDCl3
NS       0
DS       0
SWH      24038.461 Hz
FIDRES   0.733596 Hz
AQ       0.6815744 sec
RG       198.09
DW       20.500 usec
DE       6.50 usec
TE       296.4 K
D1       2.0000000 sec
D11     0.0300000 sec
TDO      1

===== CHANNEL f1 =====
SFO1    100.6229298 MHz
NUC1     13C
P1      10.00 usec
PLW1    49.5000000 W

===== CHANNEL f2 =====
SFO2    400.1316005 MHz
NUC2     1H
CPDPRG2  waltz16
PCPD2    90.00 usec
PLW2    12.5000000 W
PLW12   0.34722000 W
PLW13   0.28172000 W

F2 - Processing parameters
SI      32768
SF      100.6127885 MHz
WDW     EM
SSB     0
LB      2.00 Hz
GB      0
PC      1.00
    
```

<sup>1</sup>H and <sup>13</sup>C NMR spectra of compound 6e.

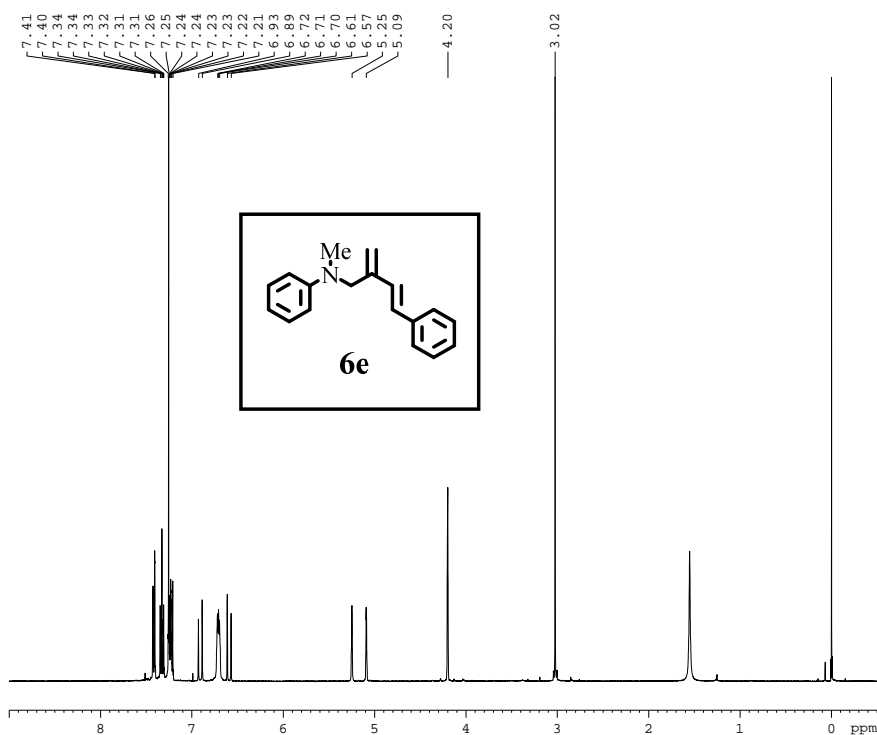

```

Current Data Parameters
NAME      3F NMR
EXPNO    1182
PROCNO   1

F2 - Acquisition Parameters
Date_    20230616
Time     21:22
INSTRUM  spect
PROBHD   5 mm PABBO BB/
PULPROG  zg30
TD        32768
SOLVENT  CDCl3
NS        16
DS        0
SWH       7211.539 Hz
FIDRES    0.220079 Hz
AQ        2.2719147 sec
RG        177.16
DW        69.333 usec
DE        10.06 usec
TE        299.2 K
D1        2.0000000 sec
TD0       1

===== CHANNEL f1 =====
SFO1     400.1324008 MHz
NUC1      1H
P1        15.00 usec
PLW1     13.50000000 W

F2 - Processing parameters
SI        16384
SF        400.1300127 MHz
WDW       EM
SSB       0
LB        0 Hz
GB        0
PC        1.00
    
```

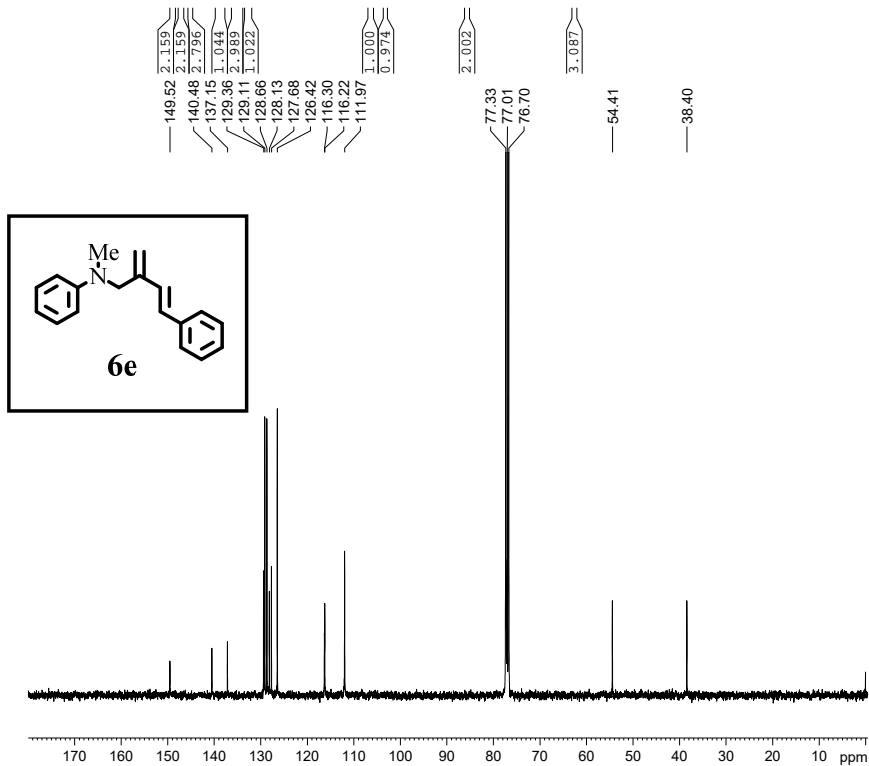

```

Current Data Parameters
NAME      3F NMR
EXPNO    1183
PROCNO   1

F2 - Acquisition Parameters
Date_    20230617
Time     22:06
INSTRUM  spect
PROBHD   5 mm PABBO BB/
PULPROG  zgpg30
TD        32768
SOLVENT  CDCl3
NS        1081
DS        0
SWH       24038.461 Hz
FIDRES    0.733596 Hz
AQ        0.6815744 sec
RG        188.09
DW        20.800 usec
DE        6.50 usec
TE        298.2 K
D1        2.0000000 sec
D11      0.03000000 sec
TD0       1

===== CHANNEL f1 =====
SFO1     100.6228298 MHz
NUC1      13C
P1        10.00 usec
PLW1     48.50000000 W

===== CHANNEL f2 =====
SFO2     400.1316005 MHz
NUC2      1H
CPDPRG2  waltz16
PCPD2    90.00 usec
PLW2     12.50000000 W
PLW12    0.34722000 W
PLW13    0.28125000 W

F2 - Processing parameters
SI        32768
SF        100.6127685 MHz
WDW       EM
SSB       0
LB        2.00 Hz
GB        0
PC        1.00
    
```

# <sup>1</sup>H and <sup>13</sup>C NMR spectra of compound 6f.

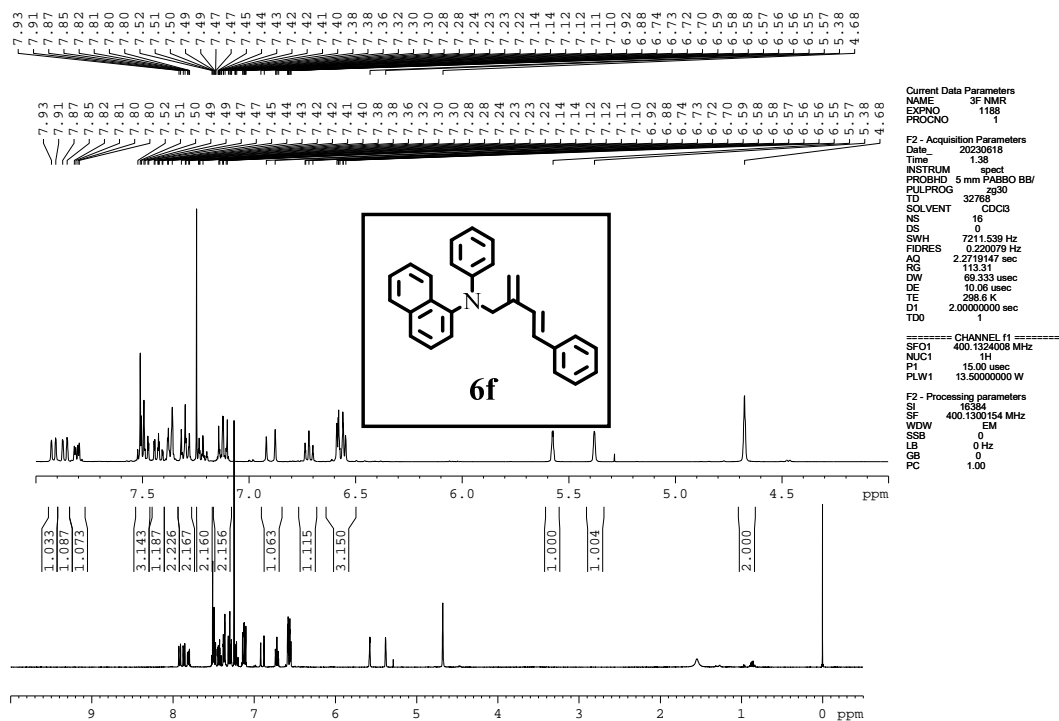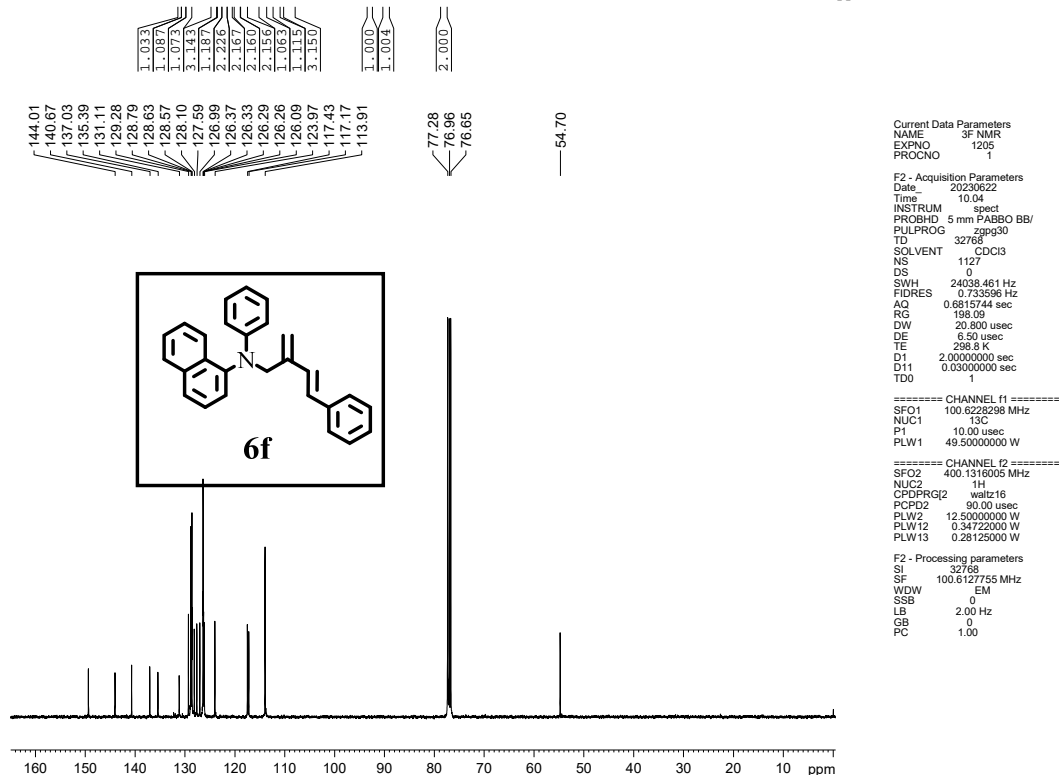



# <sup>1</sup>H and <sup>13</sup>C NMR spectra of compound 6g.

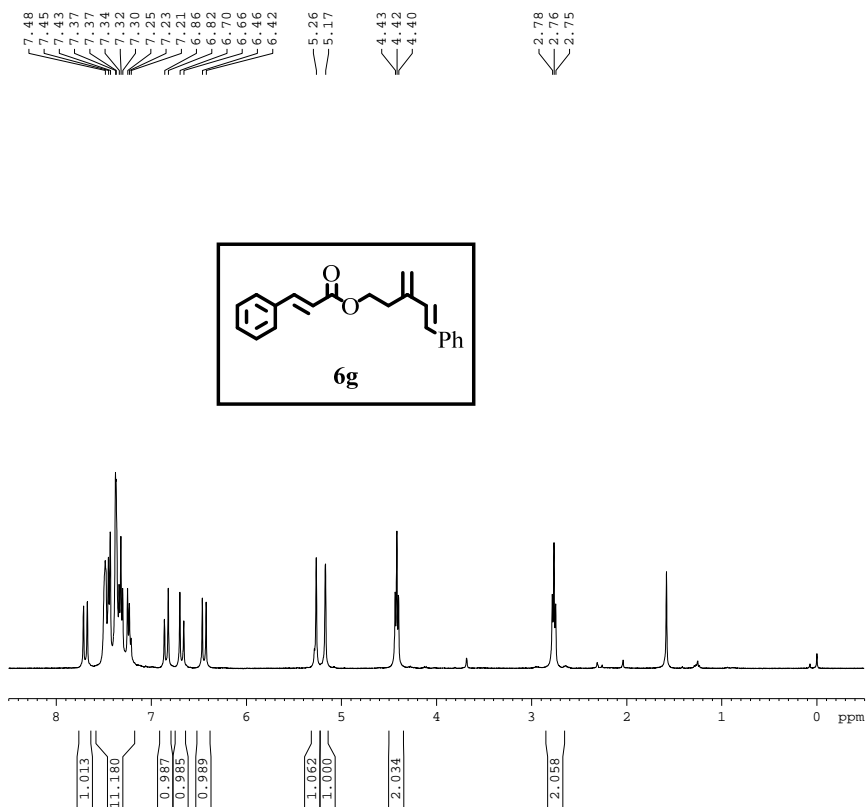

```

Current Data Parameters
NAME      3F NMR
EXPNO    1529
PROCNO   1

F2 - Acquisition Parameters
Date_    20231029
Time     17.09
INSTRUM  spect
PROBHD   5 mm PABBO BB/
PULPROG  zg30
TD        32768
SOLVENT  CDCl3
NS        16
DS        0
SWH       7211.539 Hz
FIDRES   0.220079 Hz
AQ        2.2719141 sec
RG        99.72
DW        66.333 usec
DE        10.06 usec
TE        299.2 K
D1        2.0000000 sec
D11       1
D12       1
D13       1
D14       1
D15       1
D16       1
D17       1
D18       1
D19       1
D20       1

===== CHANNEL f1 =====
SFO1     400.1324008 MHz
NUC1     1H
P1        15.00 usec
PLW1     13.50000000 W

F2 - Processing parameters
SI        16384
SF        400.1300149 MHz
WDW       EM
SSB       0
LB        0 Hz
GB        0
PC        1.00
    
```

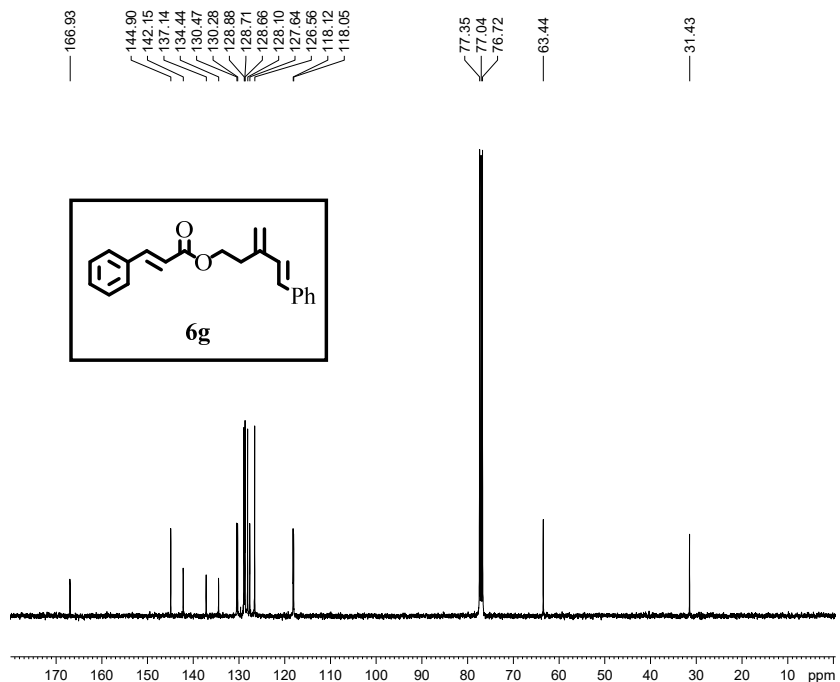

```

Current Data Parameters
NAME      3F NMR
EXPNO    1530
PROCNO   1

F2 - Acquisition Parameters
Date_    20231029
Time     17.11
INSTRUM  spect
PROBHD   5 mm PABBO BB/
PULPROG  zgpg30
TD        32768
SOLVENT  CDCl3
NS        566
DS        0
SWH       24038.461 Hz
FIDRES   0.733596 Hz
AQ        0.6815744 sec
RG        198.09
DW        20.800 usec
DE        6.50 usec
TE        299.2 K
D1        2.0000000 sec
D11       0.03000000 sec
D12       1
D13       1
D14       1
D15       1
D16       1
D17       1
D18       1
D19       1
D20       1

===== CHANNEL f1 =====
SFO1     100.6228298 MHz
NUC1     13C
P1        10.00 usec
PLW1     49.50000000 W

===== CHANNEL f2 =====
SFO2     400.1316005 MHz
NUC2     1H
CPDPRG2  .waltz16
PCPD2    90.00 usec
PLW2     12.50000000 W
PLW12    0.34722000 W
PLW13    0.28125000 W

F2 - Processing parameters
SI        32768
SF        100.6127685 MHz
WDW       EM
SSB       0
LB        2.00 Hz
GB        0
PC        1.00
    
```

**<sup>1</sup>H and <sup>13</sup>C NMR spectra of compound 6h.**

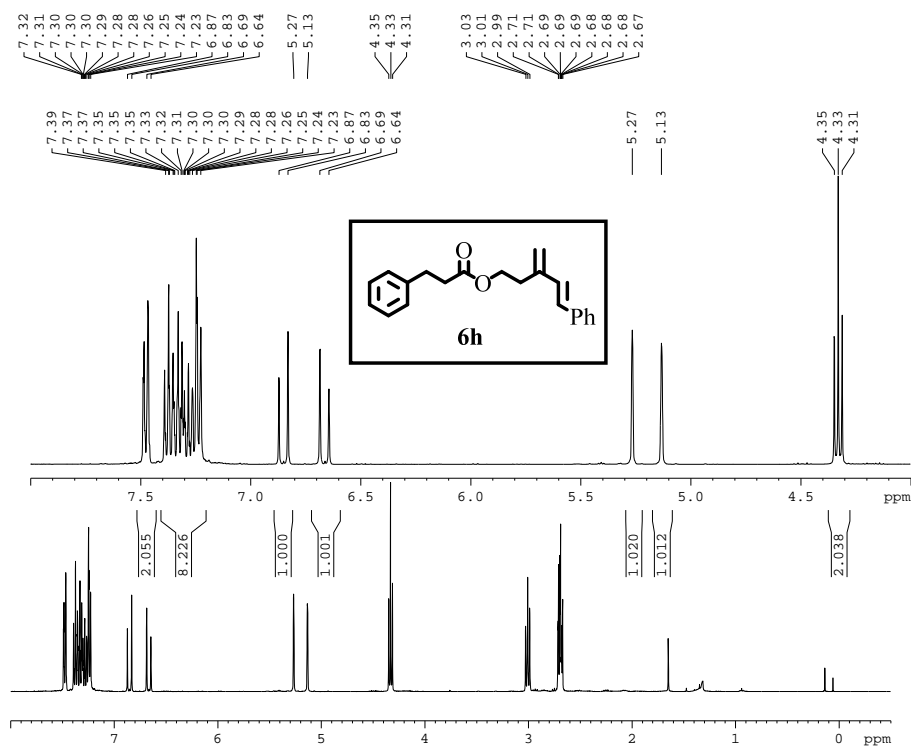

```

Current Data Parameters
NAME      3F NMR
EXPNO    1519
PROCNO   1

F2 - Acquisition Parameters
Date_    20231026
Time     22.24
INSTRUM  spect
PROBHD   5 mm FAPBO BB/
PULPROG  zg30
TD        32768
SOLVENT  CDCl3
NS        16
DS        0
SWH      7211.539 Hz
FIDRES   0.220079 Hz
AQ        2.2719147 sec
RG        51.8
DW        69.333 usec
DE        10.06 usec
TE        298.2 K
D1        2.0000000 sec
D11       1
TD0       1

===== CHANNEL f1 =====
SFO1     400.1334008 MHz
NUC1      1H
P1        15.00 usec
PLW1     13.5000000 W

F2 - Processing parameters
SI        16384
SF        400.1300000 MHz
WDW       EM
SSB       0
LB        0 Hz
GB        0
PC        1.00
    
```

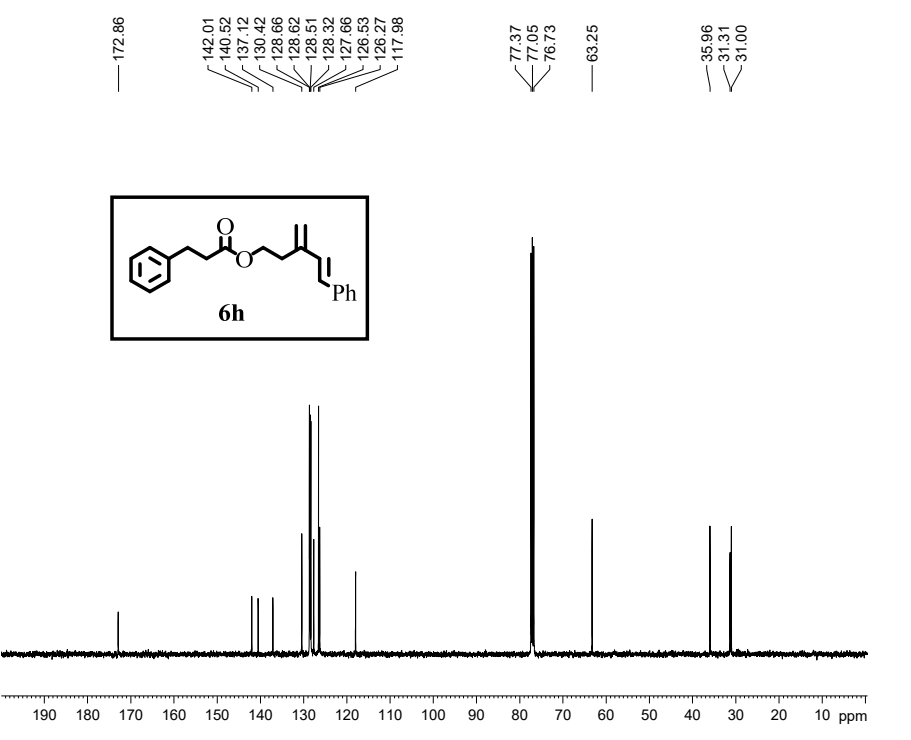

```

Current Data Parameters
NAME      3F NMR
EXPNO    1518
PROCNO   1

F2 - Acquisition Parameters
Date_    20231026
Time     22.09
INSTRUM  spect
PROBHD   5 mm FAPBO BB/
PULPROG  zgpg30
TD        32768
SOLVENT  CDCl3
NS        253
DS        0
SWH      24038.461 Hz
FIDRES   0.733596 Hz
AQ        0.6815744 sec
RG        198.09
DW        20.800 usec
DE        6.59 usec
TE        299.0 K
D1        2.0000000 sec
D11       0.0300000 sec
TD0       1

===== CHANNEL f1 =====
SFO1     100.6228298 MHz
NUC1      13C
P1        10.00 usec
PLW1     49.5000000 W

===== CHANNEL f2 =====
SFO2     400.1316005 MHz
NUC2      1H
CPDPRG2  waltz16
PCPD2    90.00 usec
PLW2     12.5000000 W
PLW12    0.34722000 W
PLW13    0.28125000 W

F2 - Processing parameters
SI        32768
SF        100.6127685 MHz
WDW       EM
SSB       0
LB        2.00 Hz
GB        0
PC        1.00
    
```

# <sup>1</sup>H and <sup>13</sup>C NMR spectra of compound 6i.

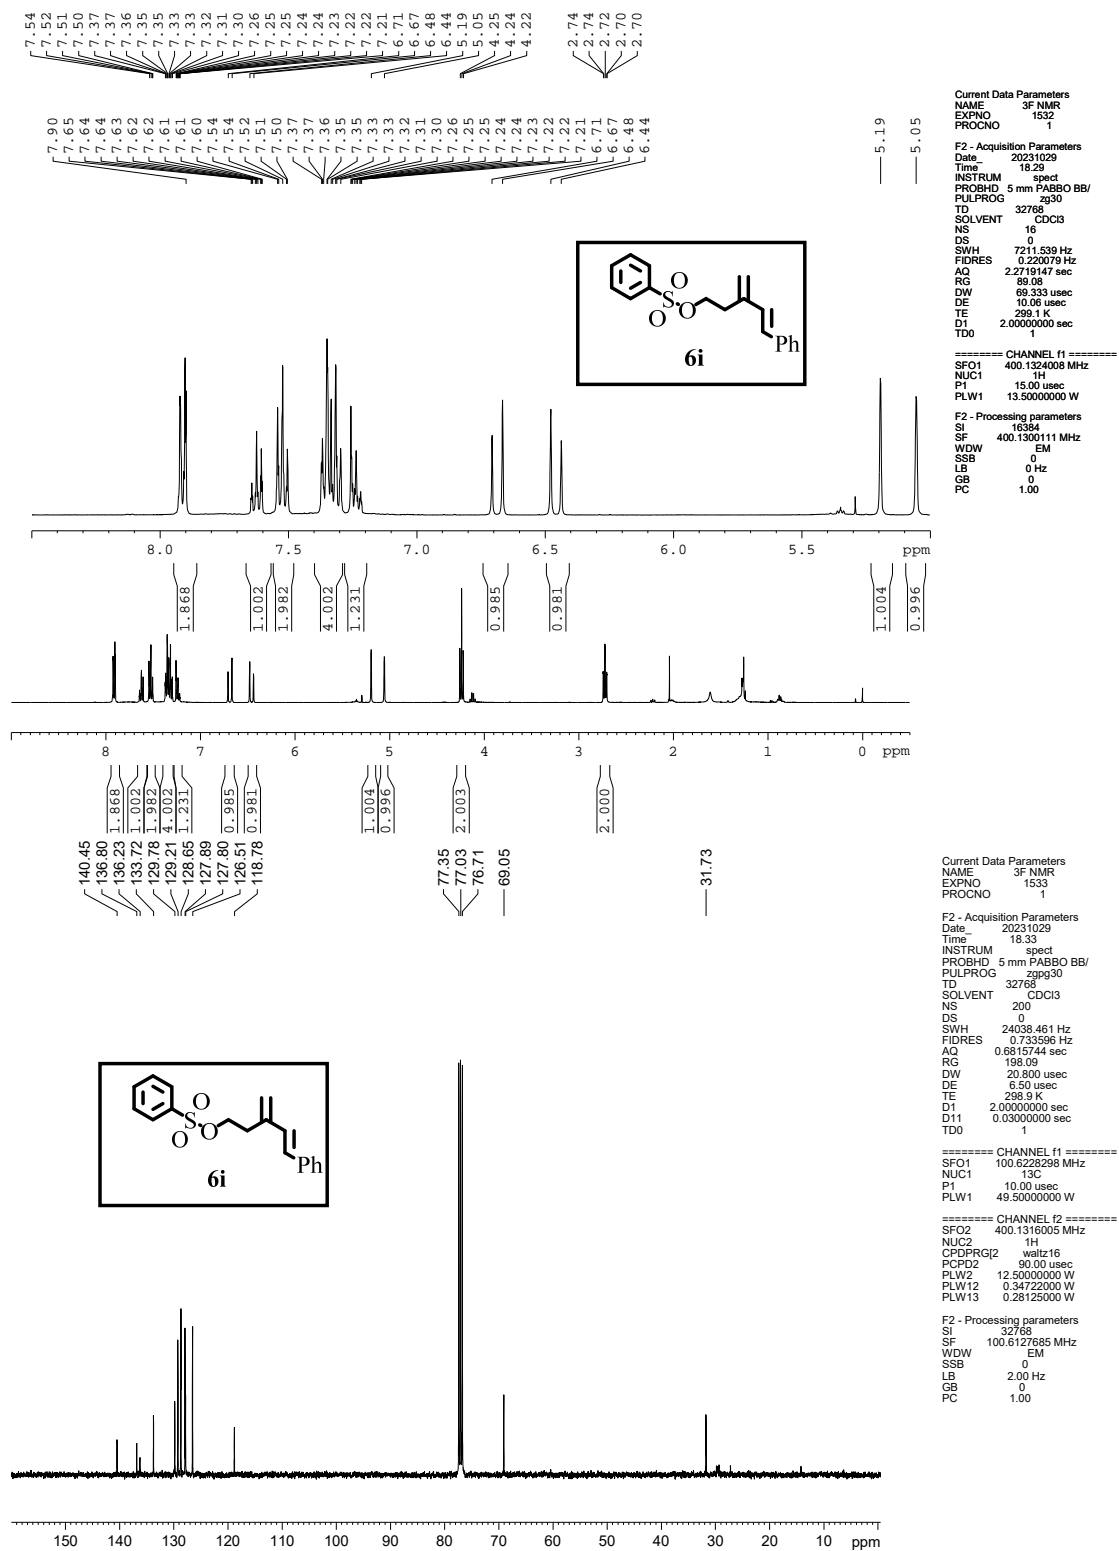

<sup>1</sup>H and <sup>13</sup>C NMR spectra of compound 7a.

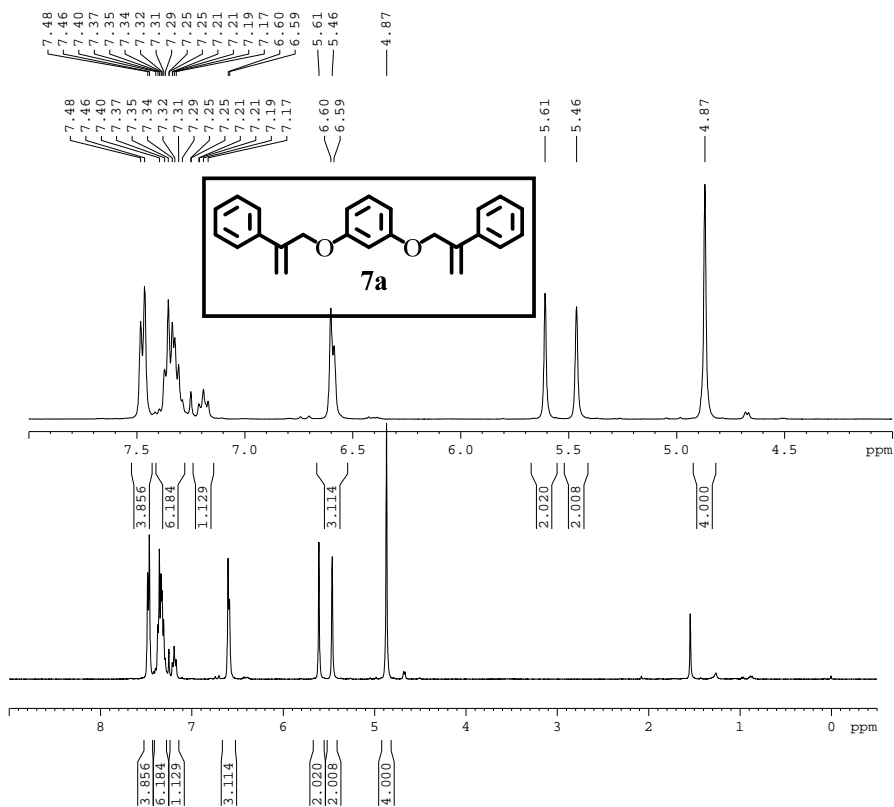

Current Data Parameters  
 NAME 3F NMR  
 EXPNO 1555  
 PROCNO 1

F2 - Acquisition Parameters  
 Date\_ 20231203  
 Time 19.29  
 INSTRUM spect  
 PROBHD 5 mm PABBO BB/  
 PULPROG zg30  
 TD 32768  
 SOLVENT CDCl3  
 NS 16  
 DS 0  
 SWH 7211.539 Hz  
 FIDRES 0.220079 Hz  
 AQ 2.2719147 sec  
 RG 98.72  
 DW 69.333 usec  
 DE 10.06 usec  
 TE 298.1 K  
 D1 2.0000000 sec  
 TDO 1

===== CHANNEL f1 =====  
 SFO1 400.1324008 MHz  
 NUC1 1H  
 P1 15.00 usec  
 PLW1 13.5000000 W

F2 - Processing parameters  
 SI 16384  
 SF 400.1300143 MHz  
 WDW EM  
 SSB 0  
 LB 0 Hz  
 GB 0  
 PC 1.00

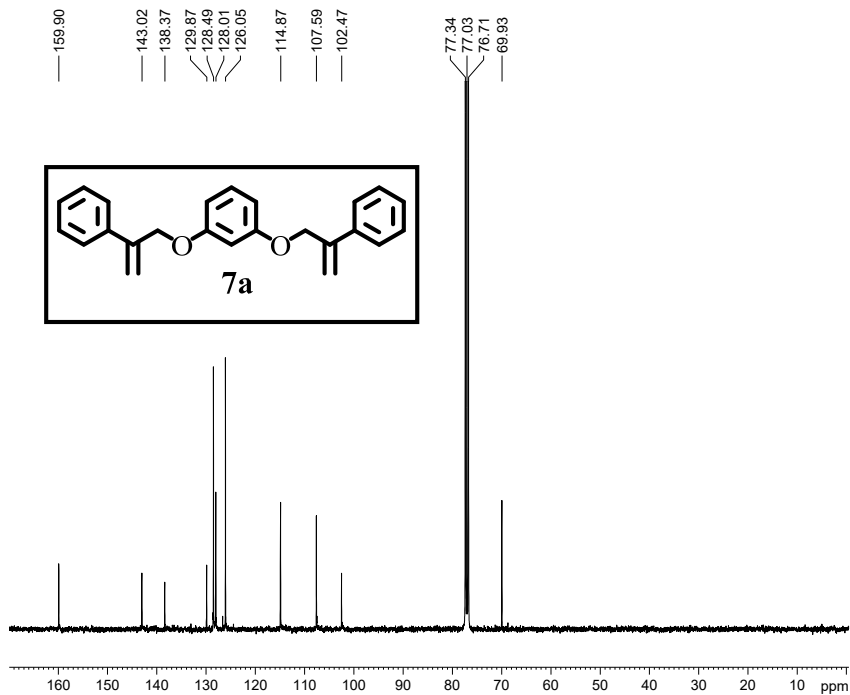

Current Data Parameters  
 NAME 3F NMR  
 EXPNO 1556  
 PROCNO 1

F2 - Acquisition Parameters  
 Date\_ 20231203  
 Time 19.29  
 INSTRUM spect  
 PROBHD 5 mm PABBO BB/  
 PULPROG zg30  
 TD 32768  
 SOLVENT CDCl3  
 NS 636  
 DS 0  
 SWH 24038.461 Hz  
 FIDRES 0.733596 Hz  
 AQ 0.6815744 sec  
 RG 198.09  
 DW 20.800 usec  
 DE 6.50 usec  
 TE 298.5 K  
 D1 2.0000000 sec  
 D11 0.03000000 sec  
 TDO 1

===== CHANNEL f1 =====  
 SFO1 100.6228298 MHz  
 NUC1 13C  
 P1 10.00 usec  
 PLW1 49.5000000 W

===== CHANNEL f2 =====  
 SFO2 400.1316005 MHz  
 NUC2 1H  
 CPDPRG2 waltz16  
 PCPD2 90.00 usec  
 PLW2 12.5000000 W  
 PLW12 0.3472300 W  
 PLW13 0.28125000 W

F2 - Processing parameters  
 SI 32768  
 SF 100.6127685 MHz  
 WDW EM  
 SSB 0  
 LB 2.00 Hz  
 GB 0  
 PC 1.00

<sup>1</sup>H and <sup>13</sup>C NMR spectra of compound 7b.

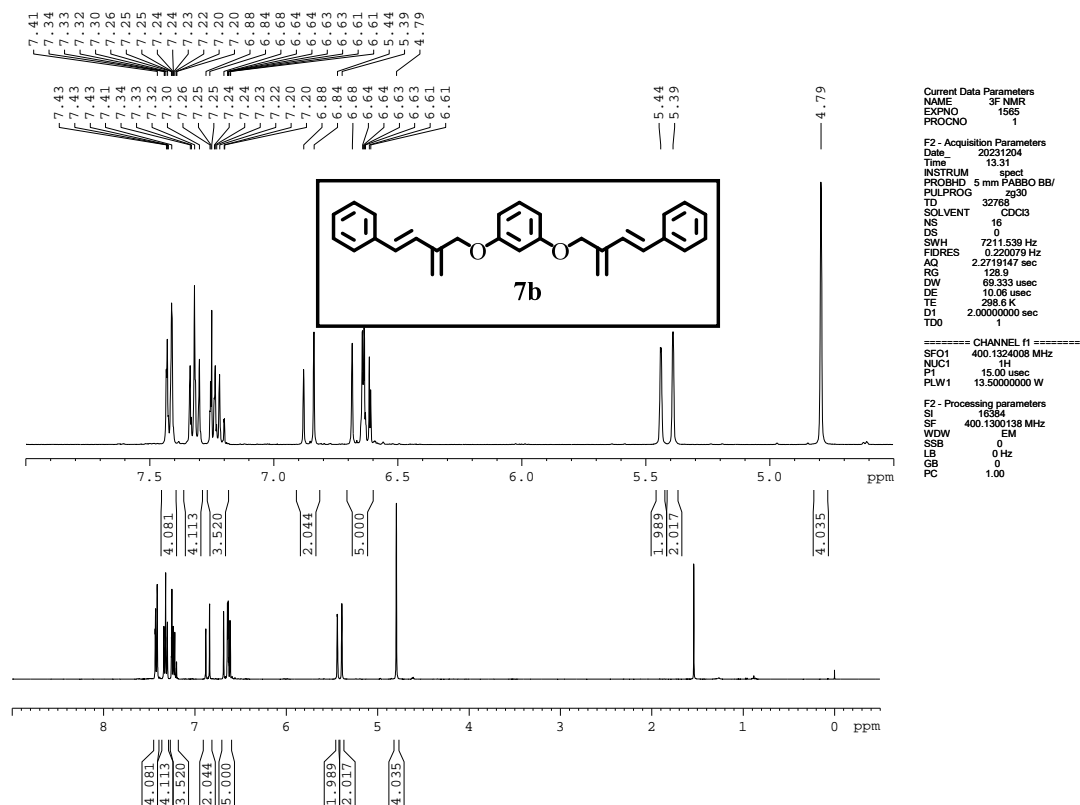

Current Data Parameters  
 NAME 3F NMR  
 EXPNO 1565  
 PROCNO 1

F2 - Acquisition Parameters  
 Date\_ 20231204  
 Time 13.31  
 INSTRUM spect  
 PROBHD 5 mm PABBO BB/  
 PULPROG zg30  
 TD 32768  
 SOLVENT CDCl3  
 NS 16  
 DS 0  
 SWH 7211.539 Hz  
 FIDRES 0.220079 Hz  
 AQ 2.2719147 sec  
 RG 128.9  
 DW 69.333 usec  
 DE 10.06 usec  
 TE 298.6 K  
 D1 2.0000000 sec  
 TDO

===== CHANNEL f1 =====  
 SFO1 400.1324008 MHz  
 NUC1 1H  
 P1 15.00 usec  
 PLW1 13.50000000 W

F2 - Processing parameters  
 SI 16364  
 SF 400.1301138 MHz  
 WDW EM  
 SSB 0  
 LB 0 Hz  
 GB 0  
 PC 1.00

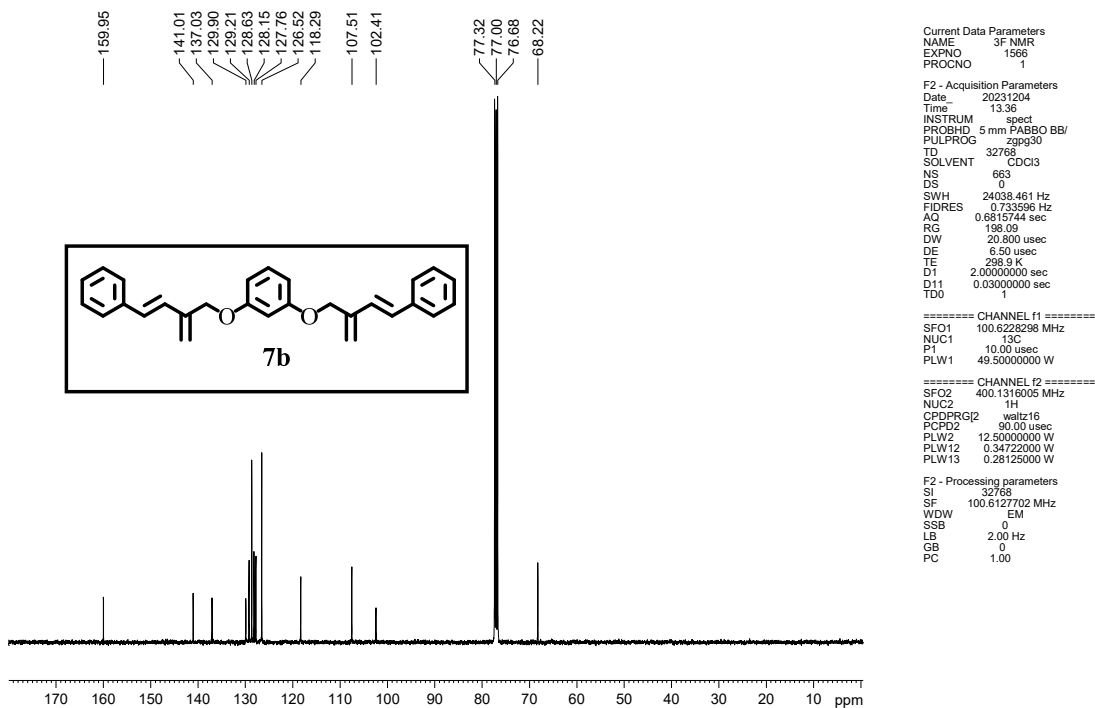

Current Data Parameters  
 NAME 3F NMR  
 EXPNO 1566  
 PROCNO 1

F2 - Acquisition Parameters  
 Date\_ 20231204  
 Time 13.36  
 INSTRUM spect  
 PROBHD 5 mm PABBO BB/  
 PULPROG zgpg30  
 TD 32768  
 SOLVENT CDCl3  
 NS 663  
 DS 0  
 SWH 24038.461 Hz  
 FIDRES 0.735596 Hz  
 AQ 0.6815744 sec  
 RG 158.09  
 DW 20.800 usec  
 DE 6.50 usec  
 TE 298.9 K  
 D1 2.0000000 sec  
 D11 0.03000000 sec  
 TDO 1

===== CHANNEL f1 =====  
 SFO1 100.6228298 MHz  
 NUC1 13C  
 P1 10.00 usec  
 PLW1 49.50000000 W

===== CHANNEL f2 =====  
 SFO2 400.1316005 MHz  
 NUC2 1H  
 CPDPRG2 waltz16  
 PCDP2 90.00 usec  
 PLW2 12.50000000 W  
 PLW12 0.34722000 W  
 PLW13 0.26125000 W

F2 - Processing parameters  
 SI 32768  
 SF 100.6127702 MHz  
 WDW EM  
 SSB 0  
 LB 2.00 Hz  
 GB 0  
 PC 1.00

# <sup>1</sup>H and <sup>13</sup>C NMR spectra of compound 8a.

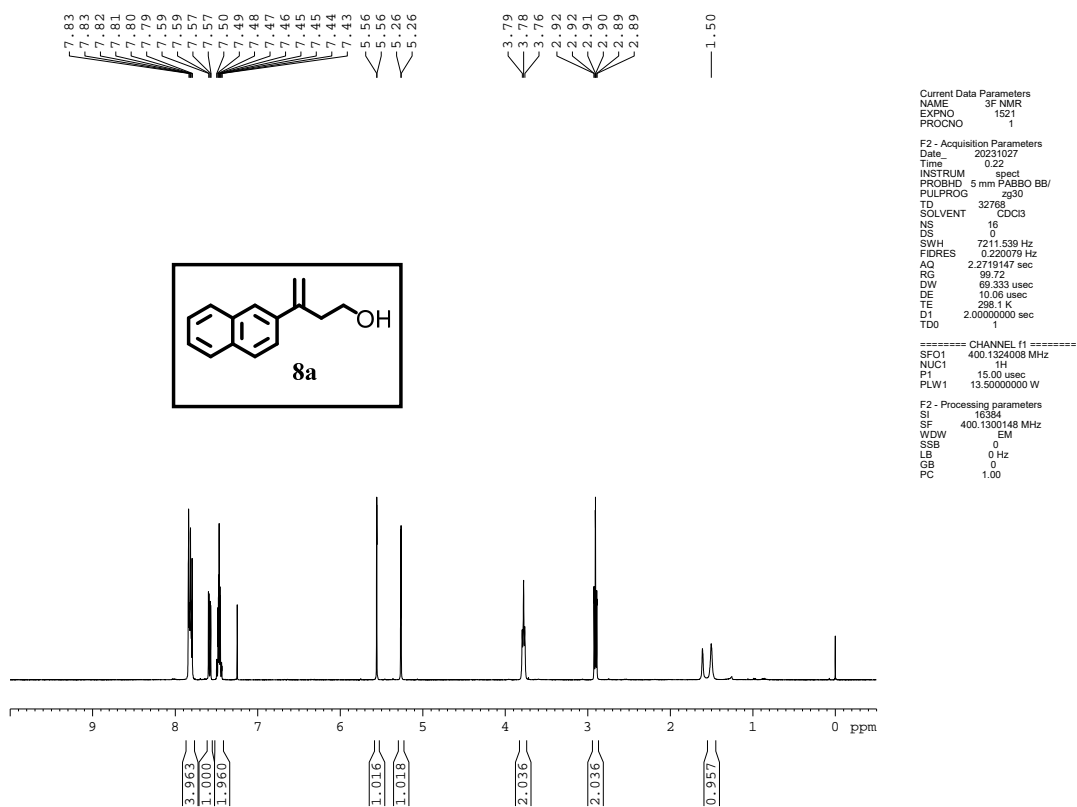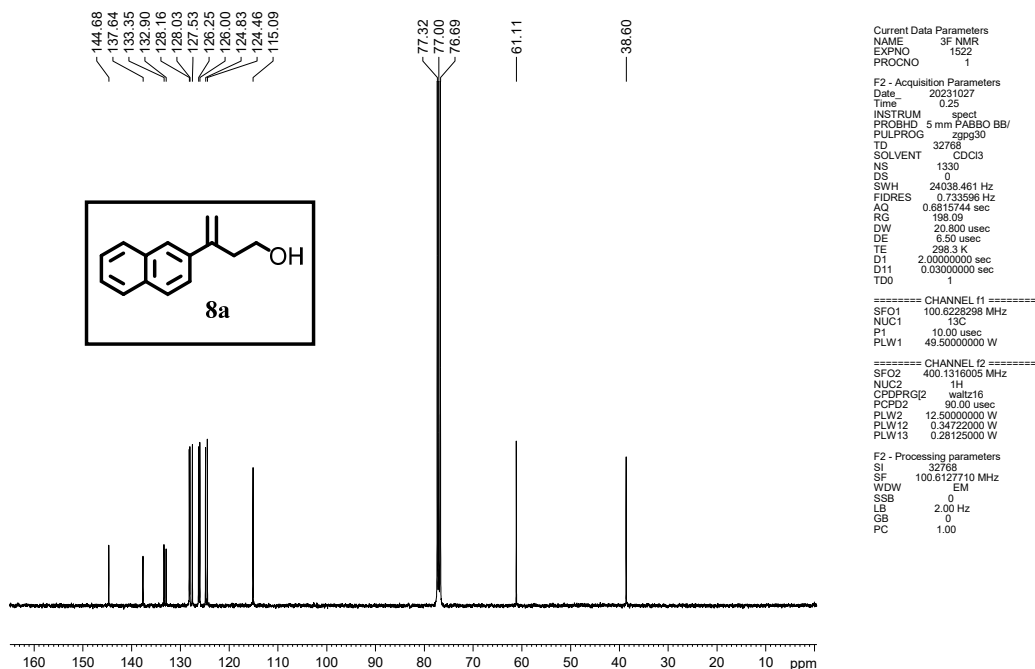

# <sup>1</sup>H and <sup>13</sup>C NMR spectra of compound 8b.

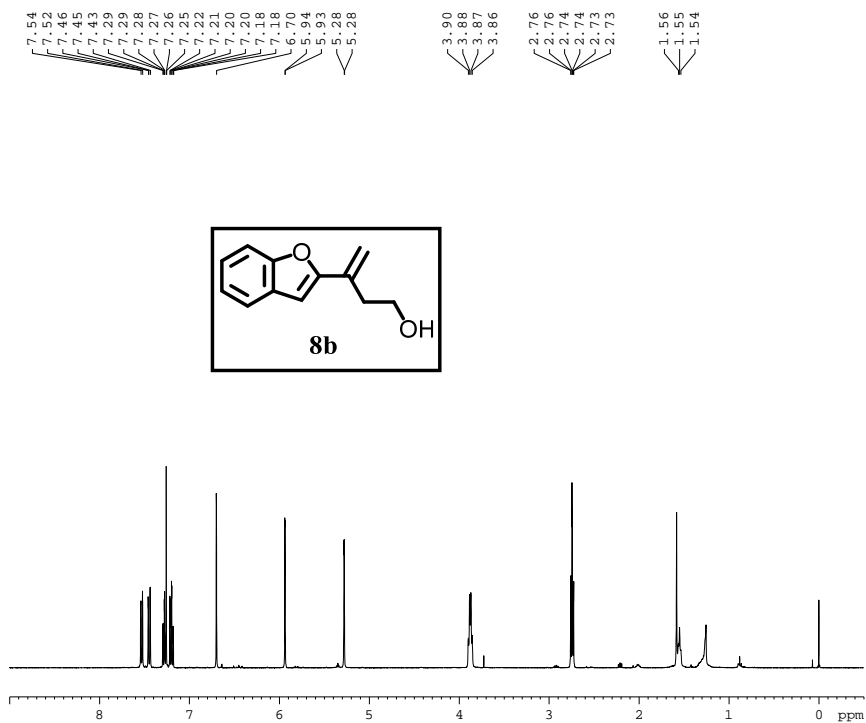

```

Current Data Parameters
NAME      3F NMR
EXPNO    1501
PROCNO   1

F2 - Acquisition Parameters
Date_    20231021
Time     21.03
INSTRUM  spect
PROBHD   5 mm PABBO BB/
PULPROG  zg30
TD       32768
SOLVENT  CDCl3
NS       16
DS       0
SWH      7211.539 Hz
FIDRES   0.220079 Hz
AQ       2.2719147 sec
RG       128.9
DW       69.833 usec
DE       10.06 usec
TE       299.1 K
D1       2.0000000 sec
D11      1
TDO      1

===== CHANNEL f1 =====
SFO1    400.1324008 MHz
NUC1     1H
P1      15.00 usec
PLW1    13.50000000 W

F2 - Processing parameters
SI      16384
SF      400.1300112 MHz
WDW     EM
SSB     0
LB      0 Hz
GB      0
PC      1.00
    
```

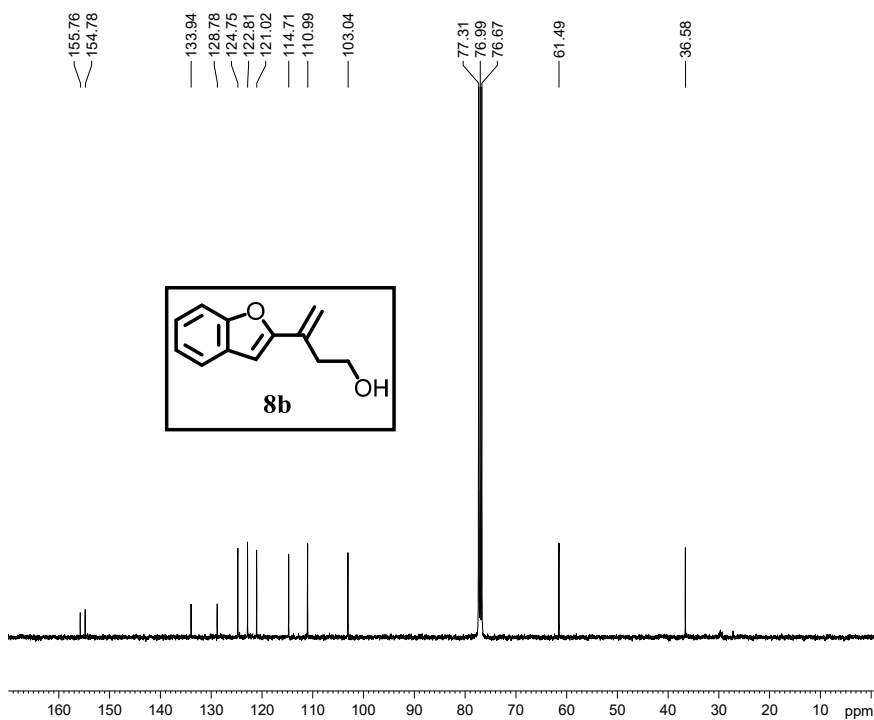

```

Current Data Parameters
NAME      3F NMR
EXPNO    1502
PROCNO   1

F2 - Acquisition Parameters
Date_    20231021
Time     21.06
INSTRUM  spect
PROBHD   5 mm PABBO BB/
PULPROG  zgpg30
TD       32768
SOLVENT  CDCl3
NS       1059
DS       0
SWH      24408.461 Hz
FIDRES   0.733596 Hz
AQ       0.6815744 sec
RG       198.09
DW       20.800 usec
DE       6.50 usec
TE       299.2 K
D1       2.0000000 sec
D11      0.03000000 sec
TDO      1

===== CHANNEL f1 =====
SFO1    100.6228298 MHz
NUC1     13C
P1      10.00 usec
PLW1    49.50000000 W

===== CHANNEL f2 =====
SFO2    400.1316005 MHz
NUC2     1H
CPDPRG2  waltz16
PCPD2    90.00 usec
PLW2    12.50000000 W
PLW12   0.34722000 W
PLW13   0.28125000 W

F2 - Processing parameters
SI      32768
SF      100.6127705 MHz
WDW     EM
SSB     0
LB      2.00 Hz
GB      0
PC      1.00
    
```

# <sup>1</sup>H and <sup>13</sup>C NMR spectra of compound 8c.

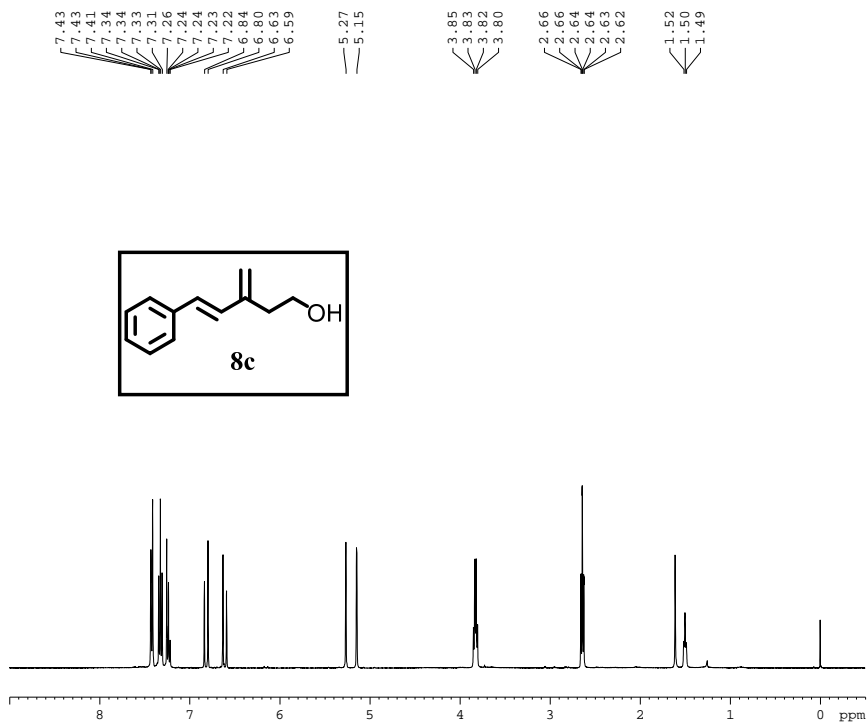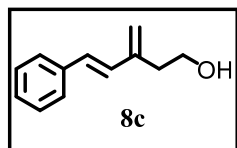

Current Data Parameters  
NAME 3F NMR  
EXPNO 1525  
PROCNO 1

F2 - Acquisition Parameters  
Date\_ 20231028  
Time 16.08  
INSTRUM spect  
PROBHD 5 mm PABBO BB/  
PULPROG zg30  
TD 32768  
SOLVENT CDCl3  
NS 16  
DS 0  
SWH 7211.539 Hz  
FIDRES 0.220079 Hz  
AQ 2.2719141 sec  
RG 128.9  
DW 69.333 usec  
DE 10.06 usec  
TE 298.0 K  
D1 2.0000000 sec  
TDO 1

===== CHANNEL f1 =====  
SFO1 400.1324008 MHz  
NUC1 1H  
P1 15.00 usec  
PLW1 13.5000000 W

F2 - Processing parameters  
SI 16384  
SF 400.1300114 MHz  
WDW EM  
SSB 0  
LB 0 Hz  
GB 0  
PC 1.00

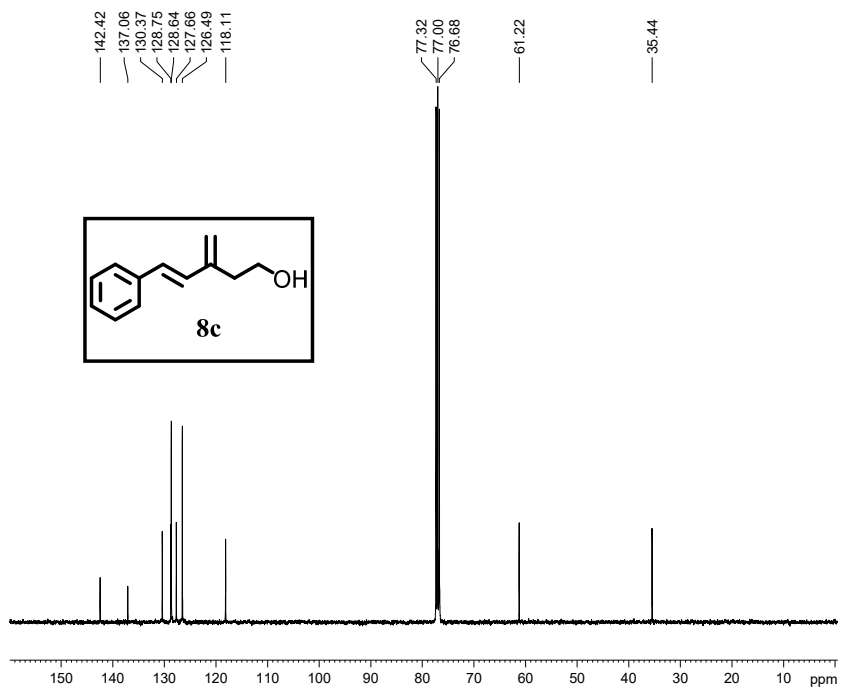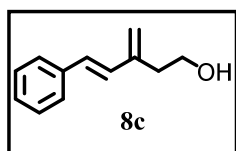

Current Data Parameters  
NAME 3F NMR  
EXPNO 1526  
PROCNO 1

F2 - Acquisition Parameters  
Date\_ 20231028  
Time 16.10  
INSTRUM spect  
PROBHD 5 mm PABBO BB/  
PULPROG zgpg30  
TD 32768  
SOLVENT CDCl3  
NS 867  
DS 0  
SWH 24038.461 Hz  
FIDRES 0.733596 Hz  
AQ 0.6915744 sec  
RG 198.09  
DW 20.800 usec  
DE 6.50 usec  
TE 299.0 K  
D1 2.0000000 sec  
D11 0.0300000 sec  
TDO 1

===== CHANNEL f1 =====  
SFO1 100.6228298 MHz  
NUC1 13C  
P1 10.00 usec  
PLW1 49.5000000 W

===== CHANNEL f2 =====  
SFO2 400.1316005 MHz  
NUC2 1H  
CPDPRG2 waltz16  
PCPD2 90.00 usec  
PLW2 12.5000000 W  
PLW12 0.34722000 W  
PLW13 0.28125000 W

F2 - Processing parameters  
SI 32768  
SF 100.6127700 MHz  
WDW EM  
SSB 0  
LB 2.00 Hz  
GB 0  
PC 1.00



# <sup>1</sup>H and <sup>13</sup>C NMR spectra of compound 9a.

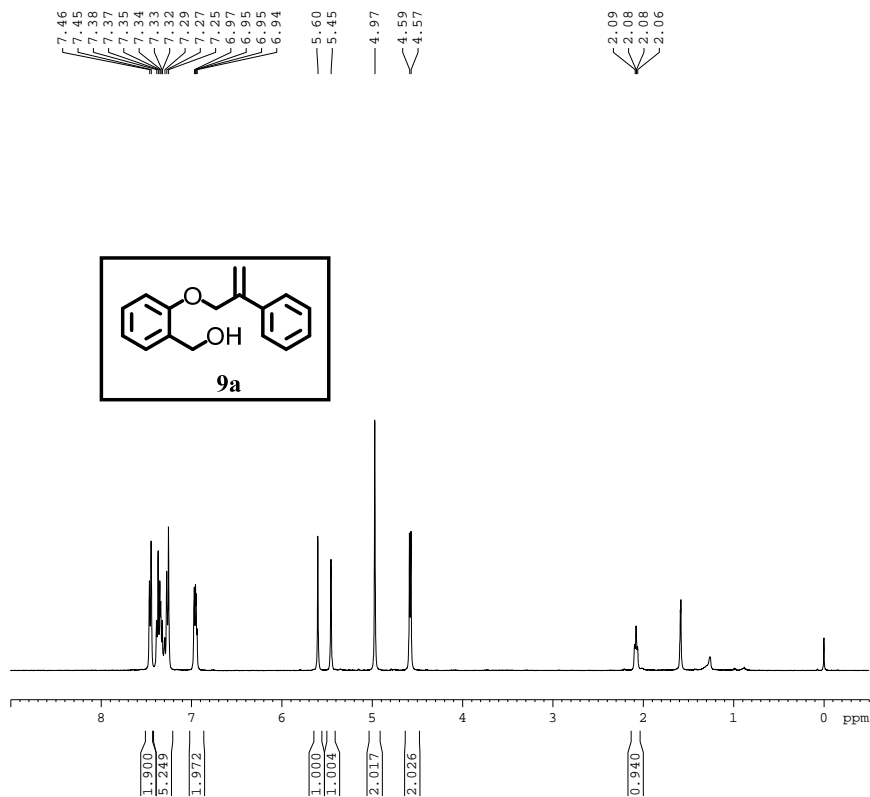

```

Current Data Parameters
NAME      3F NMR
EXPNO    1477
PROCNO   1

F2 - Acquisition Parameters
Date_    20231011
Time     21.55
INSTRUM spect
PROBHD   5 mm PABBO BB/
PULPROG zg30
TD       32768
SOLVENT  CDCl3
NS       16
DS       0
SWH      7211.539 Hz
FIDRES   0.220079 Hz
AQ       2.2719147 sec
RG       128.9
DW       69.333 usec
DE       10.08 usec
TE       296.6 K
D1       2.00000000 sec
TD0      1

===== CHANNEL f1 =====
SFO1    400.1324008 MHz
NUC1     1H
P1       15.00 usec
PLW1    13.50000000 W

F2 - Processing parameters
SI       16384
SF       400.1300128 MHz
WDW      EM
SSB      0
LB       0 Hz
GB       0
PC       1.00
    
```

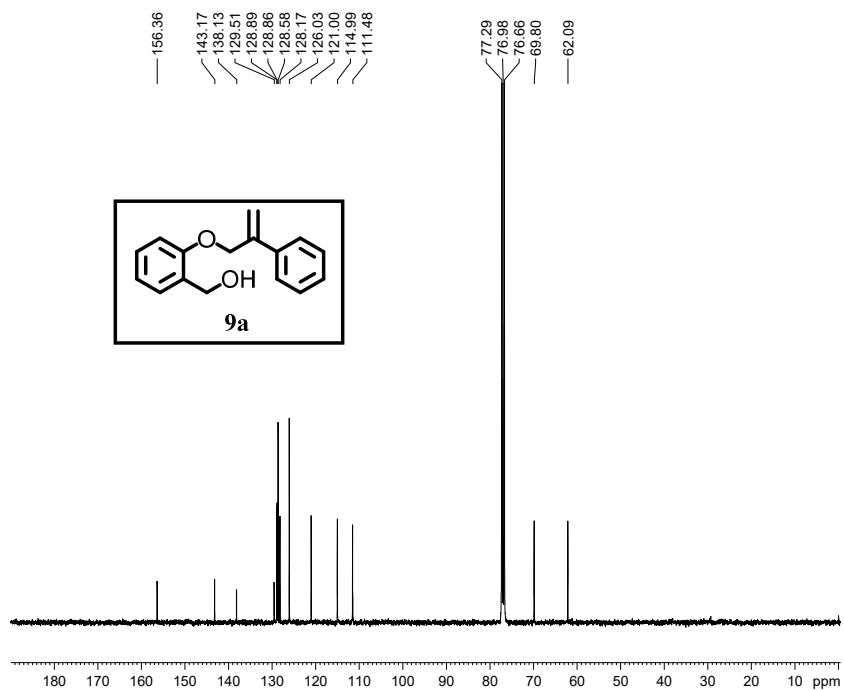

```

Current Data Parameters
NAME      3F NMR
EXPNO    1481
PROCNO   1

F2 - Acquisition Parameters
Date_    20231012
Time     22.23
INSTRUM spect
PROBHD   5 mm PABBO BB/
PULPROG zgpg30
TD       32768
SOLVENT  CDCl3
NS       1001
DS       0
SWH      24038.461 Hz
FIDRES   0.733596 Hz
AQ       0.6815744 sec
RG       198.09
DW       20.800 usec
DE       6.50 usec
TE       299.0 K
D1       2.00000000 sec
D11      0.03000000 sec
TD0      1

===== CHANNEL f1 =====
SFO1    100.6228298 MHz
NUC1     13C
P1       10.00 usec
PLW1    49.50000000 W

===== CHANNEL f2 =====
SFO2    400.1316005 MHz
NUC2     1H
CPDPRG2 waltz16
PCPD2   90.00 usec
PLW2    12.50000000 W
PLW12   0.34722000 W
PLW13   0.28125000 W

F2 - Processing parameters
SI       32768
SF       100.6127736 MHz
WDW      EM
SSB      0
LB       2.00 Hz
GB       0
PC       1.00
    
```

<sup>1</sup>H and <sup>13</sup>C NMR spectra of compound 9b.

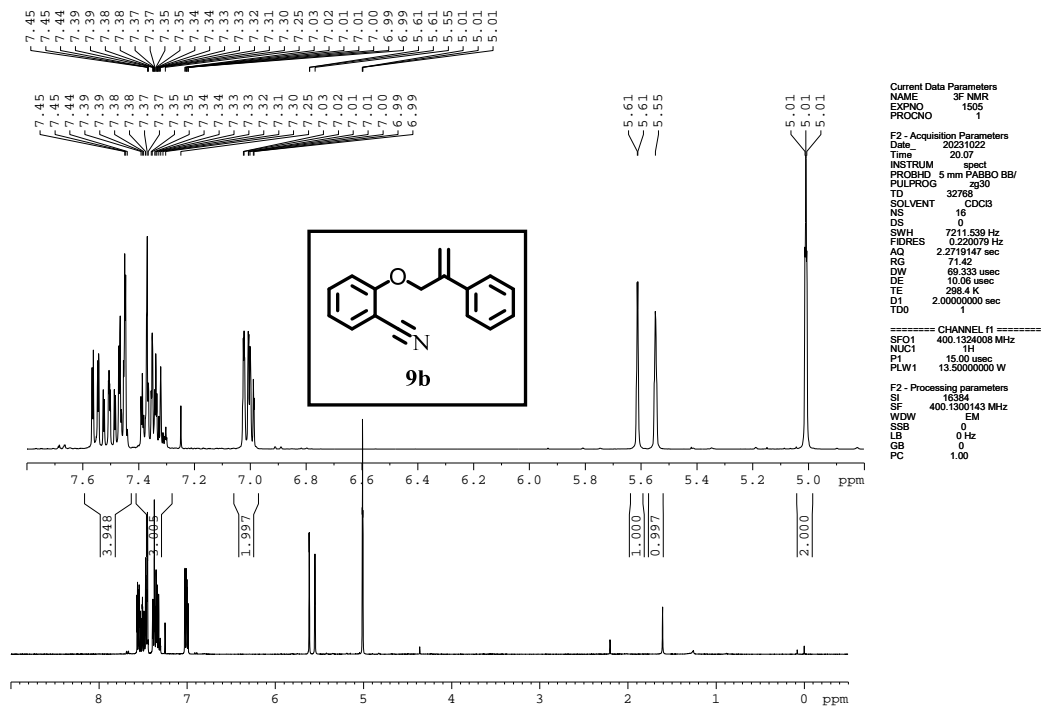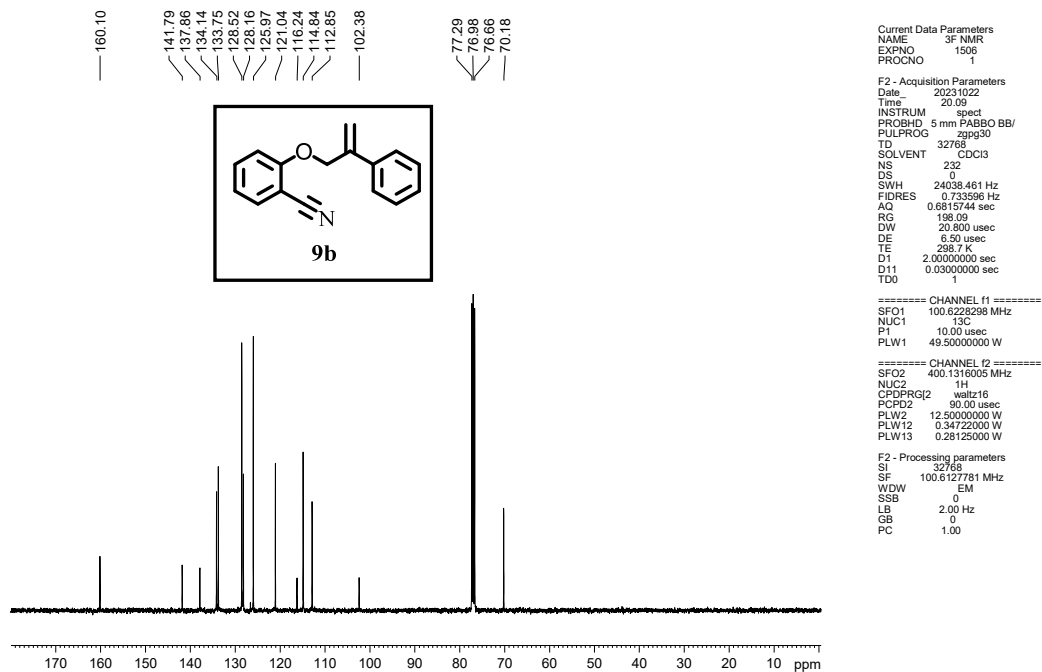

# <sup>1</sup>H and <sup>13</sup>C NMR spectra of compound 9c.

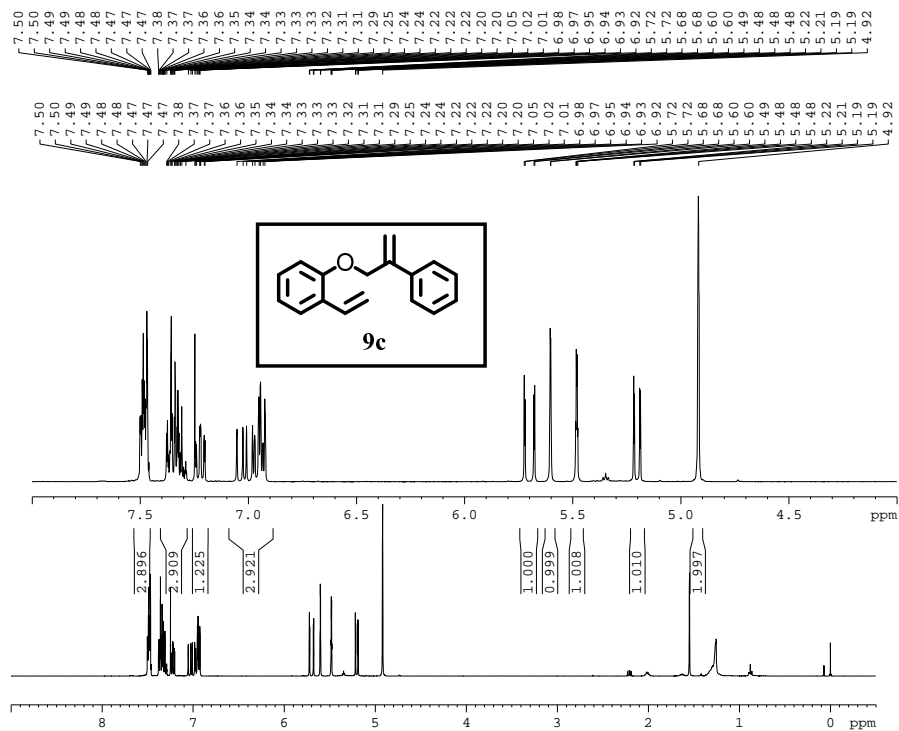

Current Data Parameters  
 NAME 3F NMR  
 EXPNO 1478  
 PROCNO 1

F2 - Acquisition Parameters  
 Date\_ 20231012  
 Time 22:05  
 INSTRUM spect  
 PROBHD 5 mm PABBO BB/  
 PULPROG zg30  
 TD 32768  
 SOLVENT CDCl3  
 NS 64  
 DS 0  
 SWH 7211.539 Hz  
 FIDRES 0.220079 Hz  
 AQ 2.2719147 sec  
 RG 113.31  
 DW 89.333 usec  
 DE 10.06 usec  
 TE 298.4 K  
 D1 2.0000000 sec  
 TDO 1

===== CHANNEL f1 =====  
 SFO1 400.1324008 MHz  
 NUC1 1H  
 P1 15.00 usec  
 PLW1 13.5000000 W

F2 - Processing parameters  
 SI 16384  
 SF 400.1300148 MHz  
 WDW EM  
 SSB 0  
 LB 0 Hz  
 GB 0  
 PC 1.00

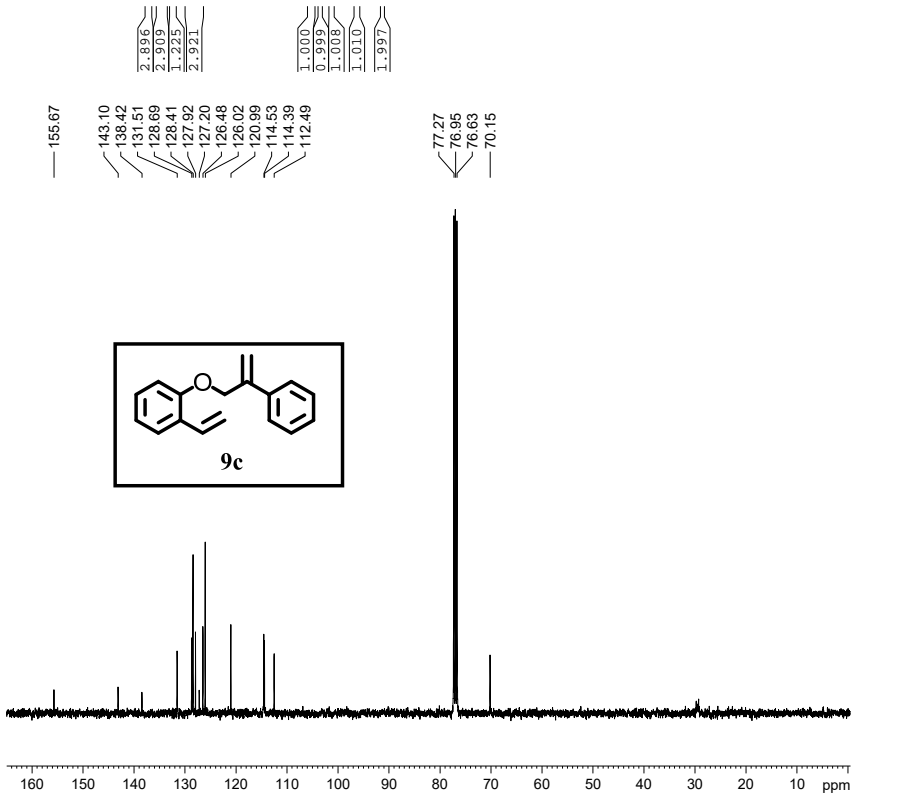

Current Data Parameters  
 NAME 3F NMR  
 EXPNO 1479  
 PROCNO 1

F2 - Acquisition Parameters  
 Date\_ 20231012  
 Time 22:08  
 INSTRUM spect  
 PROBHD 5 mm PABBO BB/  
 PULPROG zgpg30  
 TD 32768  
 SOLVENT CDCl3  
 NS 192  
 DS 0  
 SWH 24038.461 Hz  
 FIDRES 0.733596 Hz  
 AQ 0.6815744 sec  
 RG 198.09  
 DW 20.800 usec  
 DE 6.50 usec  
 TE 298.7 K  
 D1 2.0000000 sec  
 D11 0.03000000 sec  
 TDO 1

===== CHANNEL f1 =====  
 SFO1 100.6228298 MHz  
 NUC1 13C  
 P1 10.00 usec  
 PLW1 49.5000000 W

===== CHANNEL f2 =====  
 SFO2 400.1316005 MHz  
 NUC2 1H  
 CPOPRG2 waltz16  
 PCPD2 90.00 usec  
 PLW2 12.5000000 W  
 PLW12 0.3472000 W  
 PLW13 0.28125000 W

F2 - Processing parameters  
 SI 32768  
 SF 100.6127757 MHz  
 WDW EM  
 SSB 0  
 LB 2.00 Hz  
 GB 0  
 PC 1.00

<sup>1</sup>H and <sup>13</sup>C NMR spectra of compound 9d.

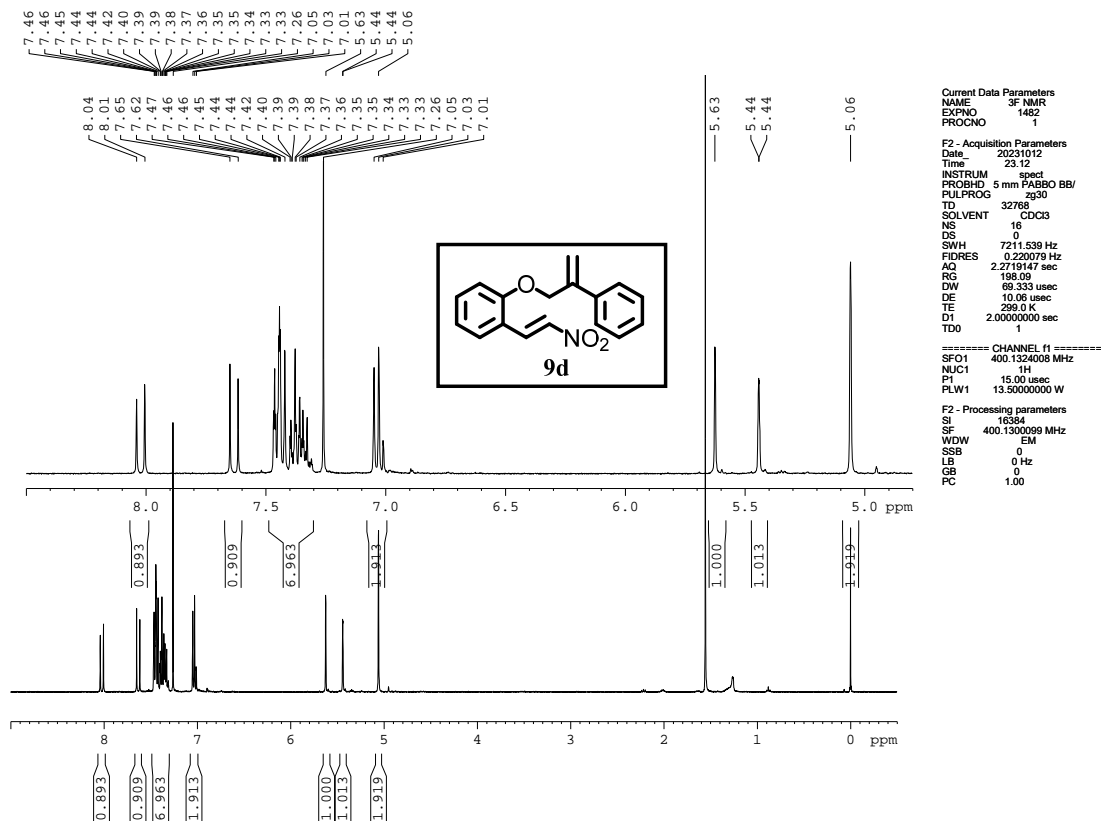

Current Data Parameters  
 NAME 3F NMR  
 EXPNO 1482  
 PROCNO 1

F2 - Acquisition Parameters  
 Date\_ 20231012  
 Time 23.12  
 INSTRUM spect  
 PROBHD 5 mm PABBO BB/  
 PULPROG zg30  
 TD 32768  
 SOLVENT CDCl3  
 NS 16  
 DS 0  
 SWH 7211.539 Hz  
 FIDRES 0.220079 Hz  
 AQ 2.2719147 sec  
 RG 198.09  
 DW 69.333 usec  
 DE 10.06 usec  
 TE 299.0 K  
 D1 2.0000000 sec  
 TDO 1

===== CHANNEL f1 =====  
 SFO1 400.1324008 MHz  
 NUC1 1H  
 P1 15.00 usec  
 PLW1 13.5000000 W

F2 - Processing parameters  
 SI 16384  
 SF 400.1300099 MHz  
 WDW EM  
 SSB 0  
 LB 0 Hz  
 GB 0  
 PC 1.00

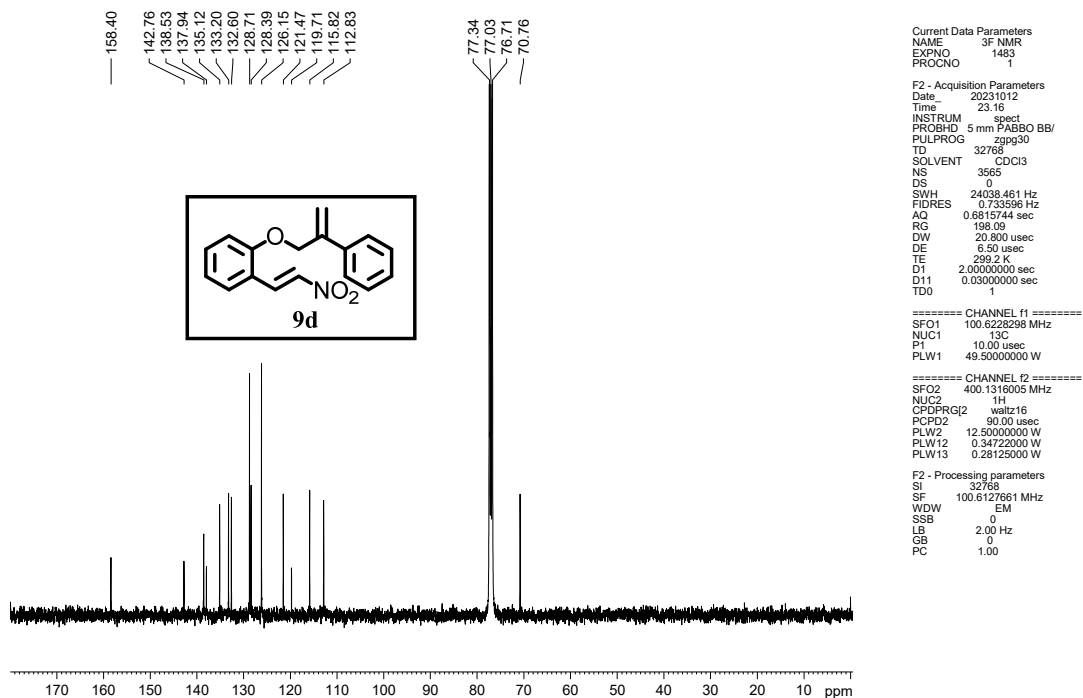

Current Data Parameters  
 NAME 3F NMR  
 EXPNO 1483  
 PROCNO 1

F2 - Acquisition Parameters  
 Date\_ 20231012  
 Time 23.16  
 INSTRUM spect  
 PROBHD 5 mm PABBO BB/  
 PULPROG zgpg30  
 TD 32768  
 SOLVENT CDCl3  
 NS 3565  
 DS 0  
 SWH 24038.461 Hz  
 FIDRES 0.733596 Hz  
 AQ 0.6615744 sec  
 RG 198.09  
 DW 20.800 usec  
 DE 6.50 usec  
 TE 299.2 K  
 D1 2.0000000 sec  
 D11 0.0000000 sec  
 TDO 1

===== CHANNEL f1 =====  
 SFO1 100.6228298 MHz  
 NUC1 13C  
 P1 10.00 usec  
 PLW1 49.5000000 W

===== CHANNEL f2 =====  
 SFO2 400.1316005 MHz  
 NUC2 1H  
 CPDPRG2 waltz16  
 PCPD2 90.00 usec  
 PLW2 12.5000000 W  
 PLW12 0.3472200 W  
 PLW13 0.28125000 W

F2 - Processing parameters  
 SI 32768  
 SF 100.6127661 MHz  
 WDW EM  
 SSB 0  
 LB 2.00 Hz  
 GB 0  
 PC 1.00

# <sup>1</sup>H and <sup>13</sup>C NMR spectra of compound 3aa.

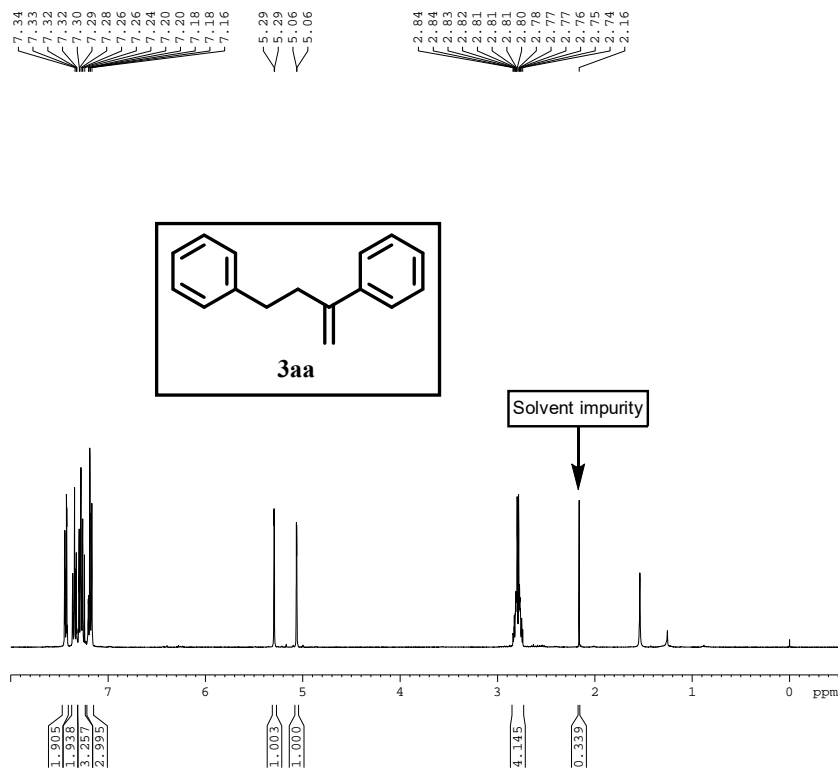

```

Current Data Parameters
NAME      3F NMR
EXPNO    1404
PROCNO   1

F2 - Acquisition Parameters
Date_    20230923
Time     20:45
INSTRUM  spect
PROBHD   5 mm PABBO BB/
PULPROG  zg30
TD        32768
SOLVENT  CDCl3
NS        16
DS        0
SWH       7211.539 Hz
FIDRES   0.220070 Hz
AQ        2.2719147 sec
RG         99.72
DW         89.333 usec
DE         10.06 usec
TE         298.15 K
D1         2.00000000 sec
TDO        1

===== CHANNEL f1 =====
SFO1     400.1324068 MHz
NUC1      1H
P1        15.00 usec
PLW1     13.50000000 W

F2 - Processing parameters
SI        16384
SF        400.1300178 MHz
WDW       EM
SSB       0
LB        0 Hz
GB        0
PC        1.00
    
```

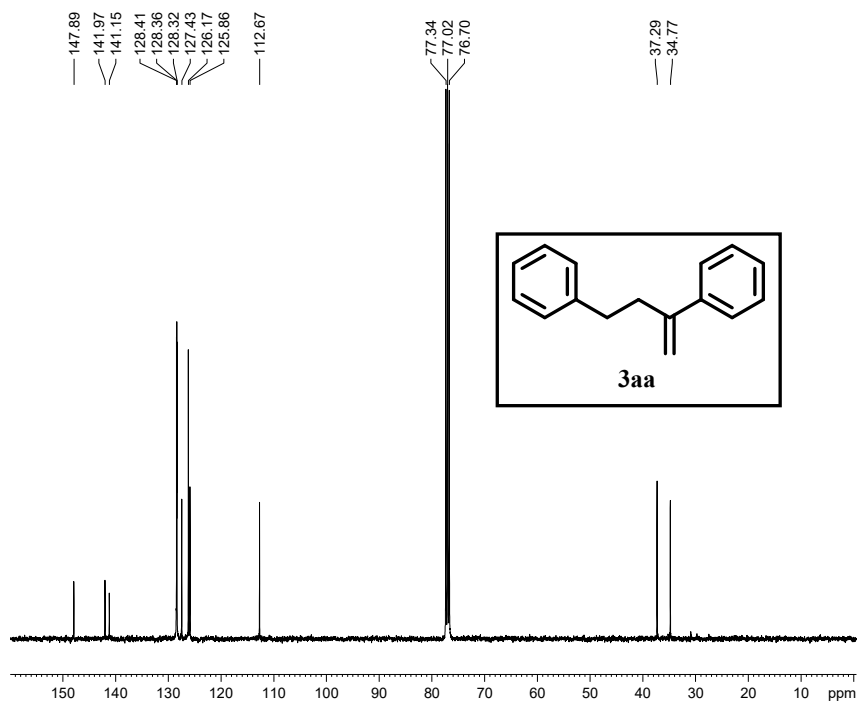

```

Current Data Parameters
NAME      3F NMR
EXPNO    1405
PROCNO   1

F2 - Acquisition Parameters
Date_    20230923
Time     20:48
INSTRUM  spect
PROBHD   5 mm PABBO BB/
PULPROG  zgpg30
TD        32768
SOLVENT  CDCl3
NS        821
DS        0
SWH       24038.461 Hz
FIDRES   0.733696 Hz
AQ        0.6815744 sec
RG         190.09
DW         20.800 usec
DE         6.50 usec
TE         299.1 K
D1         2.00000000 sec
D11       0.03000000 sec
TDO        1

===== CHANNEL f1 =====
SFO1     100.6228298 MHz
NUC1      13C
P1        10.00 usec
PLW1     49.50000000 W

===== CHANNEL f2 =====
SFO2     400.1316005 MHz
NUC2      1H
CPDPRG2  waltz16
PCPD2     90.00 usec
PLW2     12.50000000 W
PLW12    0.34722000 W
PLW13    0.28125000 W

F2 - Processing parameters
SI        32768
SF        100.6127695 MHz
WDW       EM
SSB       0
LB        2.00 Hz
GB        0
PC        1.00
    
```

# <sup>1</sup>H and <sup>13</sup>C NMR spectra of compound 3bb and 3bb' (4:1)

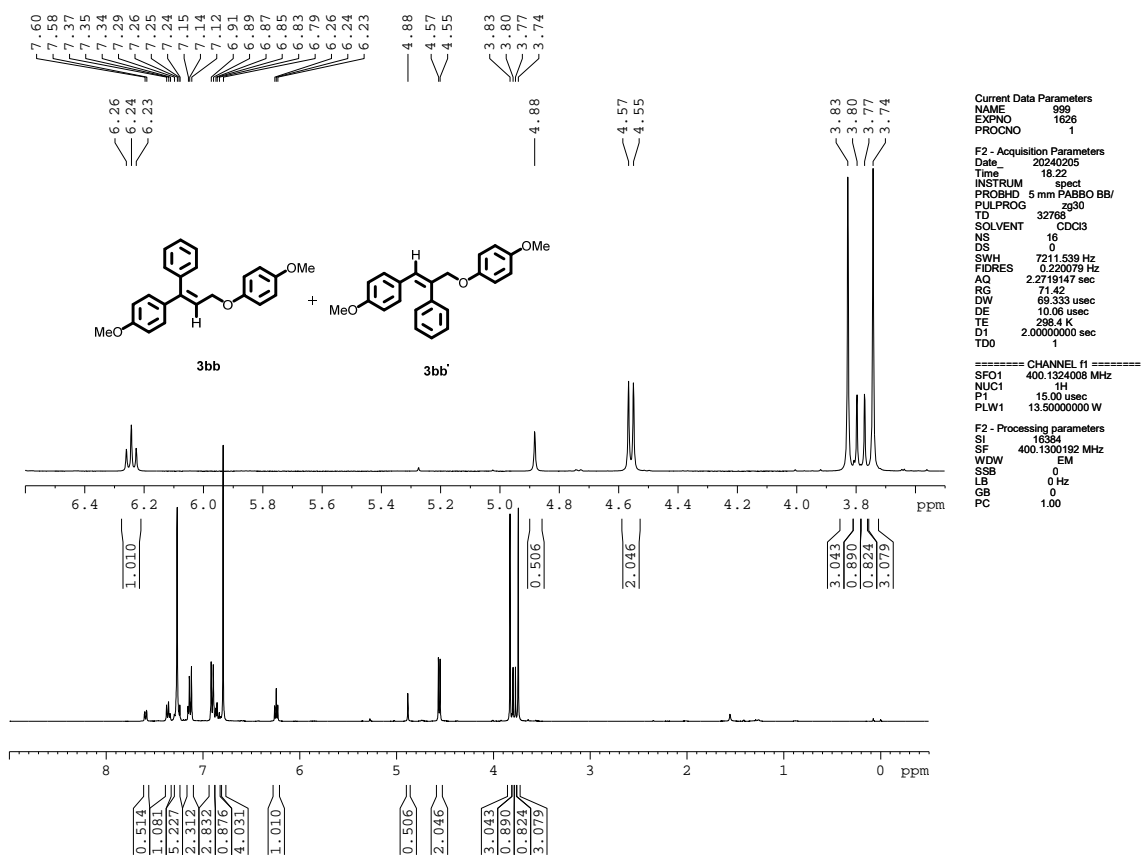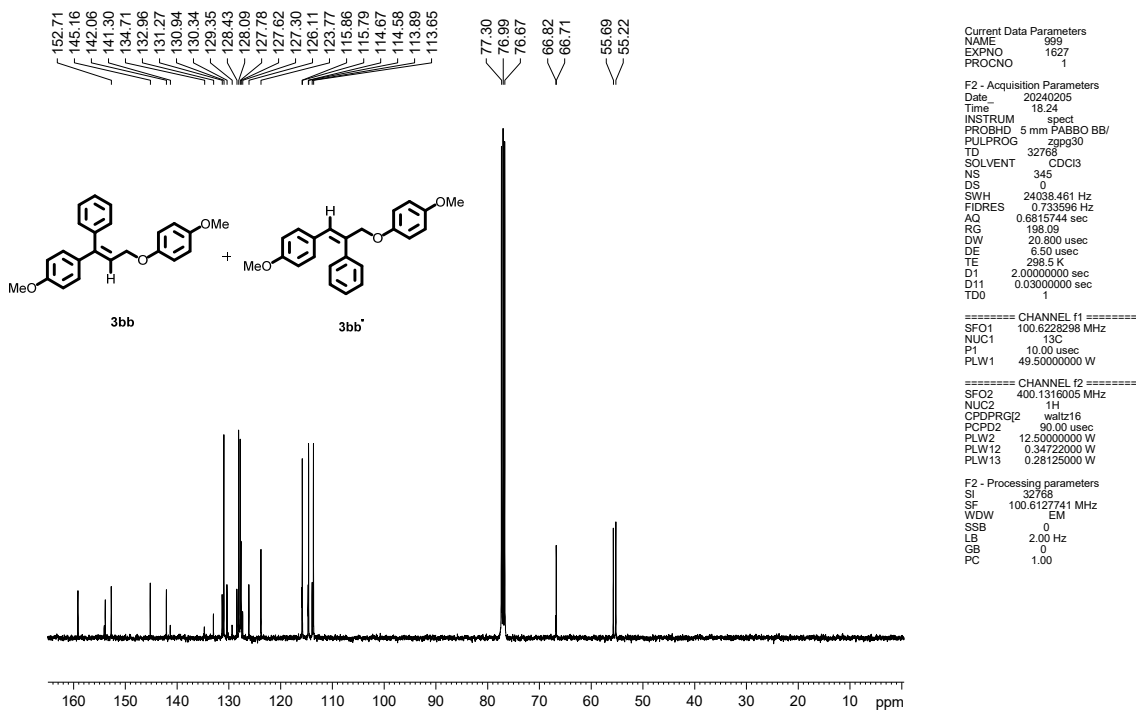

Supplement: d4cc00049h1.pdf [file d4cc00049h1.pdf]
